# Supplementary material for: ECAsT: a large dataset for conversational search and an evaluation of metric robustness
Source: PeerJ journal article supplement (doi:10.7717/peerj-cs.1328), 2023-04-17
Supplement: Submission_Supplementary_Files.xlsx [file Submission_Supplementary_Files.xlsx]

## Sheet: RAW_Test_Passage_Analysis
RAW TESTS														Paraphrased
R1,R2 and R3 are random Paraphrase Test sets.		Overall Results										[R1+R2+R3]									[ORG]				[QREL]
ORG is the original CAsT Turn Baseline.		RAW							Statistics:				SCORED Passages:				NEW #N/A Passages:				ORG Passages:				Full QREL file:
#N/A are passages not included in original QREL file.			Before new QREL addition	R1	R2	R3	ORG		# of Topics		25		Total Passages:	1872			QREL Additon:				Original QREL:
New #N/A passages are scored according to CAsT guidelines.			NDCG@3	0.3678	0.3881	0.3861	0.4802		# of Turns:		216		#N/A [no score]	446	0.238248	new!	Total [Duplicate]	446			Total	624			Original QREL:
			Recall@1000	0.4726	0.5279	0.5279	0.5875		# of Assesed Turns		208		Total Scored:	1426	0.761752		Total [unique]	393	0.881166		#N/A [no score]	10	0.0160256		Total	40451
			Map	0.2189	0.2359	0.236	0.3085						0 -not relevant	513	0.359748		0 -not relevant	317	0.806616		0 -not relevant	240	0.384615	9	0 -not relevant	33781	0.835109
			After new QREL addition										1- Slightly meets	213	0.149369		1- Slightly meets	57	0.145038		1- Slightly meets	81	0.129808	0	1- Slightly meets	2697	0.0666733
			NDCG@3	0.3885	0.3996	0.4003	0.4755						2- Moderately meets	214	0.15007		2- Moderately meets	32	0.0814249		2- Moderately meets	74	0.11859	1	2- Moderately meets	1834	0.0453388
			Recall@1000	0.4714	0.5253	0.5253	0.5787						3- highly meets	278	0.194951		3- highly meets	33	0.0839695		3- highly meets	115	0.184295	0	3- highly meets	1408	0.0348075
			Map	0.2235	0.2401	0.2413	0.3056						4-Fully meets	208	0.145863		4-Fully meets	16	0.0407125		4-Fully meets	104	0.166667	0	4-Fully meets	731	0.0180712
													R1				R2				R3
													Total Passages:	624			Total Passages:	624			Total Passages:	624
													#N/A [no score]	162	0.259615		#N/A [no score]	156	0.25		#N/A [no score]	128	0.205128		Average #N/A	0.238248
													Total Scored:	462	0.740385	#N/A Scores	Total Scored:	468	0.75	#N/A Scores	Total Scored:	496	0.794872	#N/A Scores	Average Scored	0.761752
													0 -not relevant	173	0.277244	0.734568	0 -not relevant	158	0.253205	0.75641	0 -not relevant	182	0.291667	0.625
													1- Slightly meets	73	0.116987	0.0864198	1- Slightly meets	67	0.107372	0.147436	1- Slightly meets	73	0.116987	0.15625
													2- Moderately meets	64	0.102564	0.0740741	2- Moderately meets	76	0.121795	0.0576923	2- Moderately meets	74	0.11859	0.0859375
													3- highly meets	86	0.137821	0.0679012	3- highly meets	99	0.158654	0.0384615	3- highly meets	93	0.149038	0.125
													4-Fully meets	66	0.105769	0.0555556	4-Fully meets	68	0.108974	0.0192308	4-Fully meets	74	0.11859	0.03125
				0.25				0.25				0.205128							REFERENCES [Ignore Following Columns]:
8 TURNS NOT INCLUDED IN QREL:	Total	R1				R2				R3				ORG [Baseline]						R1		R2		R3
87_6, 92_8, 93_7, 96_2, 103_7, 104_2, 104_5, 104_11	648		0.87037	162	141		0.865385	156	135		0.835938	128	107		1	10	10	446		R1											10
ORG QUERY	TURN ID	QUERY	PASSAGE	QREL	NEW QREL	QUERY	PASSAGE	QREL	NEW QREL	QUERY	PASSAGE	QREL	NEW QREL	QUERY	PASSAGE	QREL	NEW QREL	0	TRUE	COMBO ID	PASSAGE ID	COMBO ID	PASSAGE ID	COMBO ID	PASSAGE ID		QUERY	PASSAGE ID	COMBO ID	PASSAGE	QREL	NEW QREL
How do you know when your garage door opener is going bad?	81_1	When can I tell my garage door opener is going bad ?	If the unit still doesnât work the original wires are probably not the problem. 7) If all else fails most likely their is a defective part on your garage door opener. However you can not be 100% sure that one of the sensors is bad. The main logic board supplies the power to them so it is possible that the board and/or the sensors could be defective.	1		When can you tell if your garage door opener is starting to break ?	When the beam is broken, the garage door opener will not close the garage door. You can check several things to correct the problem. First, use the wall button to open the garage door to a fully opened position. Now, wipe any debris, moisture, or fingerprints off of the lenses located on both of the safety sensors.	2		How do you know your garage door opener is in a bad state ?	If the unit still doesnât work the original wires are probably not the problem. 7) If all else fails most likely their is a defective part on your garage door opener. However you can not be 100% sure that one of the sensors is bad. The main logic board supplies the power to them so it is possible that the board and/or the sensors could be defective.	1		How do you know when your garage door opener is going bad ?	If the unit still doesnât work the original wires are probably not the problem. 7) If all else fails most likely their is a defective part on your garage door opener. However you can not be 100% sure that one of the sensors is bad. The main logic board supplies the power to them so it is possible that the board and/or the sensors could be defective.	1		1	FALSE	81_1_MARCO_4516826	MARCO_4516826	81_1_MARCO_4913842	MARCO_4913842	81_1_MARCO_4516826	MARCO_4516826		How do you know when your garage door opener is going bad?	MARCO_4516826	81_1_MARCO_4516826	If the unit still doesnât work the original wires are probably not the problem. 7) If all else fails most likely their is a defective part on your garage door opener. However you can not be 100% sure that one of the sensors is bad. The main logic board supplies the power to them so it is possible that the board and/or the sensors could be defective.	1		#N/A	#N/A	#N/A
How do you know when your garage door opener is going bad?	81_1	When can I tell my garage door opener is going bad ?	The IR sensors can go bad. Not a very common problem though. I'd check rough alignment first, then inspect the wiring (it's exposed wiring so many things can bump into them). A pair of sensors is pretty cheap, but if all of a sudden your garage door refuses to close all the way it could be what's going on.	2		When can you tell if your garage door opener is starting to break ?	One sensor sends a signal to the opposite sensor in the form of an invisible beam. When the beam is broken, the garage door opener will not close the garage door. You can check several things to correct the problem. First, use the wall button to open the garage door to a fully opened position.Now, wipe any debris, moisture, or fingerprints off of the lenses located on both of the safety sensors.h…	2		How do you know your garage door opener is in a bad state ?	Garage Door Openers. Getting out of your car to open the garage door in bad weather is more than just an annoyance -- it can be dangerous. Save yourself the hassle and risk by investing in a garage door opener -- or by updating your worn-out unit. Sears offers many quality openers at competitive prices.Open the door remotely from your car, or with the press of a wall-mounted button, and never fin…	0		How do you know when your garage door opener is going bad ?	Garage Door Opener Problems. So, when the garage door opener decides to take a day off, it can leave you stuck outside, probably during a rain or snow storm. Though they may seem complicated, there really are several things most homeowners can do to diagnose and repair opener failures.nd, if you are careful not to damage the door or the seal on the bottom of the door, use a flat shovel or similar…	0		1	FALSE	81_1_MARCO_4516817	MARCO_4516817	81_1_MARCO_3942604	MARCO_3942604	81_1_MARCO_7699205	MARCO_7699205		How do you know when your garage door opener is going bad?	MARCO_5498474	81_1_MARCO_5498474	Garage Door Opener Problems. So, when the garage door opener decides to take a day off, it can leave you stuck outside, probably during a rain or snow storm. Though they may seem complicated, there really are several things most homeowners can do to diagnose and repair opener failures.nd, if you are careful not to damage the door or the seal on the bottom of the door, use a flat shovel or similar…	0		#N/A	#N/A	#N/A
How do you know when your garage door opener is going bad?	81_1	When can I tell my garage door opener is going bad ?	If you can hear your garage door motor running for what seems like the full amount of time it normally would take to open or close the door, but the door doesnât move, chances are the disconnect switch has been enabled. Every garage door opener comes with a disconnect switch in case you lose power.	1		When can you tell if your garage door opener is starting to break ?	If you have two garage doors and they get similar use, have the springs above both doors replaced when one breaks. The other one will probably break within a year. If your garage door is opening slowly or making a lot of noise, the problem may not be your opener.ip 3: Choose the right opener. When buying an opener, choose a 1/3 hp or 1/2 hp opener for a single garage door (1/3 hp can be hard to f…	1		How do you know your garage door opener is in a bad state ?	However, insulation adds weight to the door, and that may throw off the balance. If your door falls after you let go of it, hire a garage door service company to readjust the spring tension. Leaving the door in an unbalanced state can damage your garage door opener.	#N/A	0	How do you know when your garage door opener is going bad ?	The second most common reason is damage... If your door is physically damged due to wear and tear, high winds, vehicle contact or other damage you likely need to replace it. Not only can the door panels be damaged or stressed, so can the spring mechanisms, the track, and the garage door opener.	1		1	FALSE	81_1_MARCO_7246602	MARCO_7246602	81_1_MARCO_1900270	MARCO_1900270	81_1_MARCO_5756822	MARCO_5756822		How do you know when your garage door opener is going bad?	MARCO_5822853	81_1_MARCO_5822853	The second most common reason is damage... If your door is physically damged due to wear and tear, high winds, vehicle contact or other damage you likely need to replace it. Not only can the door panels be damaged or stressed, so can the spring mechanisms, the track, and the garage door opener.	1		#N/A	#N/A	#N/A
Now my garage door opener stopped working. Why?	81_2	Why is my garage door opener always breaking ?	One sensor sends a signal to the opposite sensor in the form of an invisible beam. When the beam is broken, the garage door opener will not close the garage door. You can check several things to correct the problem. First, use the wall button to open the garage door to a fully opened position.Now, wipe any debris, moisture, or fingerprints off of the lenses located on both of the safety sensors.h…	1		What broke your garage door opener ?	Check the Remote Control. The lightest and most easily damaged of garage door opener repair parts, the handheld remote control is often at the root of a malfunctioning garage door. Check to ensure the remote's battery is installed and properly seated.	3		Why does your garage door opener break ?	When the beam is broken, the garage door opener will not close the garage door. You can check several things to correct the problem. First, use the wall button to open the garage door to a fully opened position. Now, wipe any debris, moisture, or fingerprints off of the lenses located on both of the safety sensors.	2		Why did my garage door opener stop working ?	In November 2005, many automatic garage doors in Ottawa, Canada, had suddenly stopped working, due to a powerful radio signal that appeared to be interfering with the remote controls that open them.	1		2	TRUE	81_2_MARCO_3942604	MARCO_3942604	81_2_MARCO_6115074	MARCO_6115074	81_2_MARCO_4913842	MARCO_4913842		Now my garage door opener stopped working. Why?	CAR_e24797700a9c01bf0aa53a913ae8727ae275d9e6	81_2_CAR_e24797700a9c01bf0aa53a913ae8727ae275d9e6	With the garage door opener powered-up to the electrical outlet, test the center contact with a 120 volt electrical meter or test light, with one lead on the center contact of the socket and one to the metal chassis of the opener (serving as the ground).his genuine LiftMaster replacement light socket (4A1344) replaces the burnt-out socket in your current Chamberlain brand garage door opener. Thes…	1		#N/A	#N/A	#N/A
Now my garage door opener stopped working. Why?	81_2	Why is my garage door opener always breaking ?	When the beam is broken, the garage door opener will not close the garage door. You can check several things to correct the problem. First, use the wall button to open the garage door to a fully opened position. Now, wipe any debris, moisture, or fingerprints off of the lenses located on both of the safety sensors.	2		What broke your garage door opener ?	When the beam is broken, the garage door opener will not close the garage door. You can check several things to correct the problem. First, use the wall button to open the garage door to a fully opened position. Now, wipe any debris, moisture, or fingerprints off of the lenses located on both of the safety sensors.	2		Why does your garage door opener break ?	If so, you might just have a broken torsion garage door spring. Torsion springs are located above the garage door and they are what lift the actual weight of the garage door. Most doors weigh between 150 to 250 pounds and without working springs, the garage door opener cannot lift the door. Attempting to use a garage door opener to lift a garage door with a broken spring can cause numerous parts …	2		Why did my garage door opener stop working ?	Check the Remote Control. The lightest and most easily damaged of garage door opener repair parts, the handheld remote control is often at the root of a malfunctioning garage door. Check to ensure the remote's battery is installed and properly seated.	3		2	TRUE	81_2_MARCO_4913842	MARCO_4913842	81_2_MARCO_4913842	MARCO_4913842	81_2_MARCO_6024410	MARCO_6024410		Now my garage door opener stopped working. Why?	MARCO_6115074	81_2_MARCO_6115074	Check the Remote Control. The lightest and most easily damaged of garage door opener repair parts, the handheld remote control is often at the root of a malfunctioning garage door. Check to ensure the remote's battery is installed and properly seated.	3		#N/A	#N/A	#N/A
Now my garage door opener stopped working. Why?	81_2	Why is my garage door opener always breaking ?	If so, you might just have a broken torsion garage door spring. Torsion springs are located above the garage door and they are what lift the actual weight of the garage door. Most doors weigh between 150 to 250 pounds and without working springs, the garage door opener cannot lift the door. Attempting to use a garage door opener to lift a garage door with a broken spring can cause numerous parts …	2		What broke your garage door opener ?	If so, you might just have a broken torsion garage door spring. Torsion springs are located above the garage door and they are what lift the actual weight of the garage door. Most doors weigh between 150 to 250 pounds and without working springs, the garage door opener cannot lift the door. Attempting to use a garage door opener to lift a garage door with a broken spring can cause numerous parts …	2		Why does your garage door opener break ?	Opener Types. Make sure that you get the right kind of opener for your type of garage door. Most openers have a weight limit and installing a opener that doesn't support your weight could cause it to break. By selecting the right type of opener, you can avoid having to buy a new opener before the 10,000 cycles.	#N/A	0	Why did my garage door opener stop working ?	With the garage door opener powered-up to the electrical outlet, test the center contact with a 120 volt electrical meter or test light, with one lead on the center contact of the socket and one to the metal chassis of the opener (serving as the ground).his genuine LiftMaster replacement light socket (4A1344) replaces the burnt-out socket in your current Chamberlain brand garage door opener. Thes…	0		2	TRUE	81_2_MARCO_6024410	MARCO_6024410	81_2_MARCO_6024410	MARCO_6024410	81_2_MARCO_6555545	MARCO_6555545		Now my garage door opener stopped working. Why?	MARCO_8752378	81_2_MARCO_8752378	Replace the battery or batteries in the remote control. The batteries provide the power to send the signal; a lower voltage in the battery will reduce the garage door opener's range. Remove obstructions between the remote control and the door.	0	3	#N/A	#N/A	#N/A
How much does it cost for someone to repair a garage door opener?	81_3	How much does fixing a garage door opener cost ?	On average, homeowners report paying $210 to have a garage door opener repaired by a handyman. Most homeowners pay between $170 and $250 for the cost of such a repair project. The minimum reported cost to repair a broken garage door opener is $50, while the most costly repair may amount to $350. If an electrician is needed to repair faulty wiring, the cost of the repair will increase.	3		How much does it cost for someone to fix your garage door opener ?	On average, homeowners report paying $210 to have a garage door opener repaired by a handyman. Most homeowners pay between $170 and $250 for the cost of such a repair project. The minimum reported cost to repair a broken garage door opener is $50, while the most costly repair may amount to $350. If an electrician is needed to repair faulty wiring, the cost of the repair will increase.	3		What 's the cost of fixing a garage door opener ?	On average, homeowners report paying $210 to have a garage door opener repaired by a handyman. Most homeowners pay between $170 and $250 for the cost of such a repair project. The minimum reported cost to repair a broken garage door opener is $50, while the most costly repair may amount to $350. If an electrician is needed to repair faulty wiring, the cost of the repair will increase.	3		How much does it cost for someone to fix your garage door opener ?	On average, homeowners report paying $210 to have a garage door opener repaired by a handyman. Most homeowners pay between $170 and $250 for the cost of such a repair project. The minimum reported cost to repair a broken garage door opener is $50, while the most costly repair may amount to $350. If an electrician is needed to repair faulty wiring, the cost of the repair will increase.	3		3	FALSE	81_3_MARCO_368559	MARCO_368559	81_3_MARCO_368559	MARCO_368559	81_3_MARCO_368559	MARCO_368559		How much does it cost for someone to repair a garage door opener?	MARCO_368559	81_3_MARCO_368559	On average, homeowners report paying $210 to have a garage door opener repaired by a handyman. Most homeowners pay between $170 and $250 for the cost of such a repair project. The minimum reported cost to repair a broken garage door opener is $50, while the most costly repair may amount to $350. If an electrician is needed to repair faulty wiring, the cost of the repair will increase.	3		#N/A	#N/A	#N/A
How much does it cost for someone to repair a garage door opener?	81_3	How much does fixing a garage door opener cost ?	On average, homeowners report paying $210 to have a garage door opener repaired by a handyman. Most homeowners pay between $170 and $250 for the cost of such a repair project.The minimum reported cost to repair a broken garage door opener is $50, while the most costly repair may amount to $350.If an electrician is needed to repair faulty wiring, the cost of the repair will increase.he minimum rep…	4		How much does it cost for someone to fix your garage door opener ?	On average, homeowners report paying $210 to have a garage door opener repaired by a handyman. Most homeowners pay between $170 and $250 for the cost of such a repair project.The minimum reported cost to repair a broken garage door opener is $50, while the most costly repair may amount to $350.If an electrician is needed to repair faulty wiring, the cost of the repair will increase.he minimum rep…	4		What 's the cost of fixing a garage door opener ?	On average, homeowners report paying $210 to have a garage door opener repaired by a handyman. Most homeowners pay between $170 and $250 for the cost of such a repair project.The minimum reported cost to repair a broken garage door opener is $50, while the most costly repair may amount to $350.If an electrician is needed to repair faulty wiring, the cost of the repair will increase.he minimum rep…	4		How much does it cost for someone to fix your garage door opener ?	On average, homeowners report paying $210 to have a garage door opener repaired by a handyman. Most homeowners pay between $170 and $250 for the cost of such a repair project.The minimum reported cost to repair a broken garage door opener is $50, while the most costly repair may amount to $350.If an electrician is needed to repair faulty wiring, the cost of the repair will increase.he minimum rep…	4		3	FALSE	81_3_MARCO_1767683	MARCO_1767683	81_3_MARCO_1767683	MARCO_1767683	81_3_MARCO_1767683	MARCO_1767683		How much does it cost for someone to repair a garage door opener?	MARCO_1767683	81_3_MARCO_1767683	A typical service call will include a manual inspection of the door and opener. Then adjustments can be made including spring tension, chain/belt tension, limits and force adjustments and door lubrication. Fees for this service vary from place to place, but garage door repairs typically cost between $148 and $319.	4		#N/A	#N/A	#N/A
How much does it cost for someone to repair a garage door opener?	81_3	How much does fixing a garage door opener cost ?	A typical service call will include a manual inspection of the door and opener. Then adjustments can be made including spring tension, chain/belt tension, limits and force adjustments and door lubrication. Fees for this service vary from place to place, but garage door repairs typically cost between $148 and $321.	3		How much does it cost for someone to fix your garage door opener ?	Garage door opener repair can cost between $100 and $300 depending on the extent of the problem. Return to Top. The type of garage door you select -- and any extra pieces or labor required -- will influence how much you pay to have it professionally installed.	2		What 's the cost of fixing a garage door opener ?	On average, homeowners report paying $210 to have a garage door opener repaired by a handyman. Most homeowners pay between $170 and $250 for the cost of such a repair project.The minimum reported cost to repair a broken garage door opener is $50, while the most costly repair may amount to $350.ost homeowners pay between $170 and $250 for the cost of such a repair project. The minimum reported cos…	3		How much does it cost for someone to fix your garage door opener ?	Garage door opener repair can cost between $100 and $300 depending on the extent of the problem. Return to Top. The type of garage door you select -- and any extra pieces or labor required -- will influence how much you pay to have it professionally installed.	2		3	FALSE	81_3_MARCO_7070417	MARCO_7070417	81_3_MARCO_3052629	MARCO_3052629	81_3_MARCO_6159304	MARCO_6159304		How much does it cost for someone to repair a garage door opener?	MARCO_3052629	81_3_MARCO_3052629	On average, homeowners report paying $210 to have a garage door opener repaired by a handyman. Most homeowners pay between $170 and $250 for the cost of such a repair project.The minimum reported cost to repair a broken garage door opener is $50, while the most costly repair may amount to $350.If an electrician is needed to repair faulty wiring, the cost of the repair will increase.he minimum rep…	2		#N/A	#N/A	#N/A
How much does it cost to replace a garage door opener?	81_4	What is the price of a new garage door opener ?	To install a single new garage door opener will cost between $200 and $425. The higher pricing is associated with a professional installation, but for the purpose of this discussion we will actually look at the costs and requirements for installing a new garage door opener on a DIY basis.	3		What is the average price for a replacement garage door opener ?	A garage door installer charges $421 to replace a garage door opener or you can do the job yourself for $210 and save 50 percent.	3		When should you buy a new garage door opener instead of repairing the old one ?	When any object, such as a child or pet, runs through the light beam created by these sensors while the door is closing, the door immediately stops and reverses. If your garage door opener does not have a safety reversing feature, or if the one it does have no longer works, replacing the opener is highly recommended.	0		How about replacing your garage door opener instead of fixing it ?	Try installing a garage door opener yourself instead of paying someone else to do it. Installation should only take you a few hours to complete and having a garage door opener will make opening and closing your garage door every day so much quicker and easier.	1		4	TRUE	81_4_MARCO_1293770	MARCO_1293770	81_4_MARCO_1381079	MARCO_1381079	81_4_MARCO_4516825	MARCO_4516825		How much does it cost to replace a garage door opener?	MARCO_1381083	81_4_MARCO_1381083	A garage door installer charges $421 to replace a garage door opener or you can do the job yourself for $210 and save 50 percent.	1		#N/A	#N/A	#N/A
How much does it cost to replace a garage door opener?	81_4	What is the price of a new garage door opener ?	According to DIYOrNot.com, it will cost between $200 and $425 to install a single new garage door opener.	3		What is the average price for a replacement garage door opener ?	The cost of a garage door opener will depend on the horsepower, the brand and if you choose a professional to install it. A chain-driven opener can cost $150 to $350, while a belt-driven opener can cost $200 to $300. A screw-driven opener can cost $180 to $300. The popular Liftmaster garage door opener, for example, can cost $165 to $220. Genie, another popular brand, can cost $115 to $250, depen…	4		When should you buy a new garage door opener instead of repairing the old one ?	The second most common reason is damage... If your door is physically damged due to wear and tear, high winds, vehicle contact or other damage you likely need to replace it. Not only can the door panels be damaged or stressed, so can the spring mechanisms, the track, and the garage door opener.	0		How about replacing your garage door opener instead of fixing it ?	You can also replace a garage door opener with a wireless keypad. Wireless keypads can open up to three different gates or garage doors, and are usually mounted outside the garage so that family members can open the garage without the remote.ou can also replace a garage door opener with a wireless keypad. Wireless keypads can open up to three different gates or garage doors, and are usually mount…	0		4	TRUE	81_4_MARCO_97770	MARCO_97770	81_4_MARCO_8052397	MARCO_8052397	81_4_MARCO_5822853	MARCO_5822853		How much does it cost to replace a garage door opener?	MARCO_4532458	81_4_MARCO_4532458	A garage door installer charges $378 to replace a garage door opener or you can do the job yourself for $210 and save 44 percent. Adjust the home improvement and repair cost with your ZIP Code.	0		#N/A	#N/A	#N/A
How much does it cost to replace a garage door opener?	81_4	What is the price of a new garage door opener ?	, Garage Door Technician, Specialist. According to garagedooropenershq.com, it will cost between $200 and $425 to install a single new garage door opener. The higher pricing is associated with a professional installation, but for the purpose of this discussion we will actually look at the costs and requirements for installing a new garage door opener on a DIY basis.	#N/A	3	What is the average price for a replacement garage door opener ?	A garage door installer charges $378 to replace a garage door opener or you can do the job yourself for $210 and save 44 percent. Adjust the home improvement and repair cost with your ZIP Code.	3		When should you buy a new garage door opener instead of repairing the old one ?	When it comes time to buy a new garage door opener, you might be surprised at the number of options you face. Here are some guidelines on how to make the best choice for your garage. Type of Drive. Garage door openers come with three different types of drive: chain, belt and screw.1 Chain-drive openers are the oldest style, and they continue to be very popular and a good value.ype of Drive. Garag…	#N/A	0	How about replacing your garage door opener instead of fixing it ?	Get your quote now >>. If you have a garage door that is malfunctioning or not working at all, you may be in need of a repair. While the repair can be pricey, it will usually be less expensive than replacing the garage door altogether. With regular maintenance and quality parts, a garage door can last 20 or more years.	0		4	TRUE	81_4_MARCO_5107801	MARCO_5107801	81_4_MARCO_1293772	MARCO_1293772	81_4_MARCO_4532454	MARCO_4532454		How much does it cost to replace a garage door opener?	MARCO_5570939	81_4_MARCO_5570939	A garage door installation service charges $421 to replace an electric garage door opener in a typical two-car garage, which includes the labor and material. If you're a handy homeowner, you can replace an old unit with a new one for $210, the garage door opener installation cost, and save 50 percent.	0		3	#N/A	0							3
How do I choose a new garage door opener?	81_5	What should I look for when selecting a new garage door opener ?	How to Choose a Garage Door Opener. With so many different types of garage door openers on the market, you may not be sure where to start. The main consideration for a garage door opener is the drive type, which refers to the actual chain, belt, or other mechanism that moves and lifts the door. In some circumstances, the horsepower output of the motor should be considered as well, but typically i…	3		On what basis should I choose a replacement for my garage door opener ?	How to Choose a Garage Door Opener. With so many different types of garage door openers on the market, you may not be sure where to start. The main consideration for a garage door opener is the drive type, which refers to the actual chain, belt, or other mechanism that moves and lifts the door. In some circumstances, the horsepower output of the motor should be considered as well, but typically i…	3		What type of garage door opener should I get ?	How to Choose a Garage Door Opener. With so many different types of garage door openers on the market, you may not be sure where to start. The main consideration for a garage door opener is the drive type, which refers to the actual chain, belt, or other mechanism that moves and lifts the door. In some circumstances, the horsepower output of the motor should be considered as well, but typically i…	3		How do I choose a new garage door opener ?	How to Choose a Garage Door Opener. With so many different types of garage door openers on the market, you may not be sure where to start. The main consideration for a garage door opener is the drive type, which refers to the actual chain, belt, or other mechanism that moves and lifts the door. In some circumstances, the horsepower output of the motor should be considered as well, but typically i…	3		5	FALSE	81_5_MARCO_7713538	MARCO_7713538	81_5_MARCO_7713538	MARCO_7713538	81_5_MARCO_7713538	MARCO_7713538		How do I choose a new garage door opener?	MARCO_7713538	81_5_MARCO_7713538	How to Choose a Garage Door Opener. With so many different types of garage door openers on the market, you may not be sure where to start. The main consideration for a garage door opener is the drive type, which refers to the actual chain, belt, or other mechanism that moves and lifts the door. In some circumstances, the horsepower output of the motor should be considered as well, but typically i…	3		#N/A	#N/A	#N/A
How do I choose a new garage door opener?	81_5	What should I look for when selecting a new garage door opener ?	Look for horsepower (HP) ratings to compare the lifting power between garage door opener models. Ratings ranging from 1/2-horsepower to 1-1/2 horsepower are typical for residential models. If you have a sectional double-car garage door, a 1/2-horsepower motor should be sufficient, but a higher-power model will operate with less effort and less wear and tear on the motor.	2		On what basis should I choose a replacement for my garage door opener ?	When it comes time to buy a new garage door opener, you might be surprised at the number of options you face. Here are some guidelines on how to make the best choice for your garage. Type of Drive. Garage door openers come with three different types of drive: chain, belt and screw.1 Chain-drive openers are the oldest style, and they continue to be very popular and a good value.ype of Drive. Garag…	2		What type of garage door opener should I get ?	It really depends on how heavy your door is.The 1/3 horsepower garage door opener is pretty much for people who want to save money. Only the lightest garage door should be used with those. The 1/3 hp have a smaller work-load rating and do not have as good a warranty as the others have. For most garage doors, a 1/2 horsepower garage door opener is just fine, but if you have a really really heavy d…	2		How do I choose a new garage door opener ?	When it comes time to buy a new garage door opener, you might be surprised at the number of options you face. Here are some guidelines on how to make the best choice for your garage. Type of Drive. Garage door openers come with three different types of drive: chain, belt and screw.1 Chain-drive openers are the oldest style, and they continue to be very popular and a good value.ype of Drive. Garag…	2		5	FALSE	81_5_MARCO_6568087	MARCO_6568087	81_5_MARCO_4532454	MARCO_4532454	81_5_MARCO_6568085	MARCO_6568085		How do I choose a new garage door opener?	MARCO_4532454	81_5_MARCO_4532454	When it comes time to buy a new garage door opener, you might be surprised at the number of options you face. Here are some guidelines on how to make the best choice for your garage. Type of Drive. Garage door openers come with three different types of drive: chain, belt and screw.1 Chain-drive openers are the oldest style, and they continue to be very popular and a good value.ype of Drive. Garag…	2		#N/A	#N/A	#N/A
How do I choose a new garage door opener?	81_5	What should I look for when selecting a new garage door opener ?	Opener Types. Make sure that you get the right kind of opener for your type of garage door. Most openers have a weight limit and installing a opener that doesn't support your weight could cause it to break. By selecting the right type of opener, you can avoid having to buy a new opener before the 10,000 cycles.	2		On what basis should I choose a replacement for my garage door opener ?	The garage door motor is located on the ceiling. Extra garage door opener remotes come in handy; however, choosing the right opener can be confusing. Each manufacturer makes its own replacement remotes, and universal remotes are also available. You must determine the features you need and the size of the remote.	1		What type of garage door opener should I get ?	Types of Openers. Chain driven garage door openers are great option if price is the most important factor. These openers use chain to get the garage door open. They tend to be loud and so not the best choice for garages that also contain a work space or a living space above. But they are the cheapest so if price is the issue, choose this type of opener.	2		How do I choose a new garage door opener ?	Trending Now. Answers. Best Answer: Call (800) 35-GENIE they can help you select the proper opener. Please remember that the easier it is for you to operate your garage door manually, the easier it will be for the new garage door opener to open the door, resulting in a longer lifespan for the new system.	1		5	FALSE	81_5_MARCO_6555545	MARCO_6555545	81_5_MARCO_7095690	MARCO_7095690	81_5_MARCO_1778528	MARCO_1778528		How do I choose a new garage door opener?	MARCO_6568086	81_5_MARCO_6568086	Trending Now. Answers. Best Answer: Call (800) 35-GENIE they can help you select the proper opener. Please remember that the easier it is for you to operate your garage door manually, the easier it will be for the new garage door opener to open the door, resulting in a longer lifespan for the new system.	1		#N/A	#N/A	#N/A
What does a smart garage door opener do?	81_6	What is a smart one ?	A Smart Nation is one where people are empowered by technology to lead meaningful and fulfilled lives. A Smart Nation harnesses the power of networks, data and info-comm technologies to improve living, create economic opportunity and build a closer community. A Smart Nation is built not by Government, but by all of us - citizens, companies, agencies. This website chronicles some of our endeavours…	#N/A	0	What are the benefits of a smart garage door opener ?	Make the Smart Investment on a New Garage Door & Opener. Think about it â the garage is often one of the most prominent exterior features on most homes, and, a beautiful garage door not only enhances your homeâs curb appeal, itâs also a home improvement update that delivers one of the highest returns on investment.	0		What are the functionalities of a smart garage door opener ?	Get better versatility with the 3-Function Garage Door Opener. The Craftsman Visor Remote Control Garage Door Opener lets you control three different garage doors from the comfort of your car. The metallic hook slides onto the visor, and the slim, dark profile makes it easy to access when you need it, but easy to ignore when you don't.	0		What does a smart garage door opener do ?	A garage door opener is a motorized device that opens and closes garage doors. Most are controlled by switches on the garage wall, as well as by remote controls carried by the owner.	0		6	TRUE	81_6_MARCO_5041279	MARCO_5041279	81_6_MARCO_1720869	MARCO_1720869	81_6_MARCO_6542463	MARCO_6542463		What does a smart garage door opener do?	CAR_4a47011356515d1f05a97d2c045c085da86a55e5	81_6_CAR_4a47011356515d1f05a97d2c045c085da86a55e5	A garage door opener is a motorized device that opens and closes garage doors. Most are controlled by switches on the garage wall, as well as by remote controls carried by the owner.	0		#N/A	#N/A	#N/A							0
What does a smart garage door opener do?	81_6	What is a smart one ?	What is a Smart Home? A Smart Home is one that provides its home owners comfort, security, energy efficiency (low operating costs) and convenience at all times, regardless of whether anyone is home.	0		What are the benefits of a smart garage door opener ?	Our line of Wi-Fi garage door openers allow for seamless control of your garage through your smartphone without the need for add ons. From industry-leading, quiet operation, to state of the art technology, our most advanced openers perform beyond the highest expectation.	1		What are the functionalities of a smart garage door opener ?	More sophisticated features are also available, such as an integrated carbon monoxide sensor to open the door in case of the garage being flooded with exhaust fumes. Other systems allow door activation over the Internet to allow home owners to open their garage door from their office for deliveries.	#N/A	1	What does a smart garage door opener do ?	Smart Homes start with a Smart Garage. Now is the time to upgrade your garage door opener with smartphone controls. Update what you have Get a new opener. Available Now! Universal Mini Garage Door Remote â For On the Go! Buy Now. Get Connected Today! Try The Garage Door Opener Selector Tool. Learn More.	1		6	TRUE	81_6_MARCO_6531040	MARCO_6531040	81_6_MARCO_5089866	MARCO_5089866	81_6_CAR_eb49e319fcead64d226ffee5b1528b7850e78087	CAR_eb49e319fcead64d226ffee5b1528b7850e78087		What does a smart garage door opener do?	MARCO_5446008	81_6_MARCO_5446008	Smart Homes start with a Smart Garage. Now is the time to upgrade your garage door opener with smartphone controls. Update what you have Get a new opener. Available Now! Universal Mini Garage Door Remote â For On the Go! Buy Now. Get Connected Today! Try The Garage Door Opener Selector Tool. Learn More.	1		#N/A	#N/A	3
What does a smart garage door opener do?	81_6	What is a smart one ?	smart home or building. A smart home or building is a home or building, usually a new one, that is equipped with special structured wiring to enable occupants to remotely control or program an array of automated home electronic devices by entering a single command.	#N/A	0	What are the benefits of a smart garage door opener ?	Receive alerts when the garage door opens and closes. With Chamberlain's MyQ Garage, your Smartphone, Wi-Fi and any compatible garage door opener, you are committed in control. The Chamberlain MyQ Smartphone app is free with no monthly fees. 1 Know that your garage door is open and close it from anywhere.	#N/A	0	What are the functionalities of a smart garage door opener ?	Smart Homes start with a Smart Garage. Now is the time to upgrade your garage door opener with smartphone controls. Update what you have Get a new opener. Available Now! Universal Mini Garage Door Remote â For On the Go! Buy Now. Get Connected Today! Try The Garage Door Opener Selector Tool. Learn More.	1		What does a smart garage door opener do ?	A garage door opener is a motorized device that opens and closes a garage door. Most are controlled by switches on the garage wall, as well as by a remote control carried in the garage owner's vehicle. In 1926, the electric garage door opener was invented by C.G. Johnson, the inventor of the garage door and founder of the Overhead Door Corporation.	0		6	TRUE	81_6_MARCO_4668122	MARCO_4668122	81_6_MARCO_7517889	MARCO_7517889	81_6_MARCO_5446008	MARCO_5446008		What does a smart garage door opener do?	CAR_82e2512becbd3c7fe7614857c4d01841330b2a14	81_6_CAR_82e2512becbd3c7fe7614857c4d01841330b2a14	A garage door opener is a motorized device that opens and closes a garage door. Most are controlled by switches on the garage wall, as well as by a remote control carried in the garage owner's vehicle. In 1926, the electric garage door opener was invented by C.G. Johnson, the inventor of the garage door and founder of the Overhead Door Corporation.	0		#N/A	1	#N/A							0
What's important for me to know about the safety of smart garage door openers?	81_7	What do you think about the smart version 's security ?	On May 5, 2011, ESET released a beta test version of ESET Smart Security 5.0. The beta version adds parental control, a cloud-based file reputation service, gamer mode, HIPS and improvements to its antispam, firewall and removable media control functions. On June 14, 2011, ESET released a release candidate for ESET Smart Security version 5.0.	#N/A	0	What is the safety of a smart one ?	A smart gun, or personalized gun, is a firearm that includes a safety feature or features that allow it to fire only when activated by an authorized user. These safety features can prevent misuse, accidental shootings, gun thefts, use of the weapon against the owner, and self-harm. Smart guns distinguish between authorized users and unauthorized users in several different ways, including the use …	#N/A	0	What are some safety tips for using smart ones ?	Smart firearms safety technology is intended to prevent the accidental use and misuse of firearms by children and teens, as well as reducing accidental discharges or the use of a firearm against its owner if the firearm is stolen or taken away. Smart guns may also reduce incidents of suicide by unauthorized users of a firearm.	#N/A	0	What 's important for me to know about the safety of a smart garage door opener ?	The garage door is generally the largest moving object in a home. An improperly adjusted garage door opener can exert strong and deadly forces and might not reverse the garage door in an emergency. The garage door counterbalance springs should be properly adjusted in order for the safety reverse system to function properly. Thus, proper installation and maintenance are extremely important in orde…	0		7	FALSE	81_7_CAR_f1d73f96dc6986f4e216ef19f87268899e9aaf86	CAR_f1d73f96dc6986f4e216ef19f87268899e9aaf86	81_7_CAR_354606d83600114d9c5628b3d2692dbb06e6edd6	CAR_354606d83600114d9c5628b3d2692dbb06e6edd6	81_7_CAR_f84d63bf2d994bad804783a35521d0f68cb7e287	CAR_f84d63bf2d994bad804783a35521d0f68cb7e287		What's important for me to know about the safety of smart garage door openers?	CAR_353cc3cd905dd74409d47f331979acca2cd72545	81_7_CAR_353cc3cd905dd74409d47f331979acca2cd72545	The garage door is generally the largest moving object in a home. An improperly adjusted garage door opener can exert strong and deadly forces and might not reverse the garage door in an emergency. The garage door counterbalance springs should be properly adjusted in order for the safety reverse system to function properly. Thus, proper installation and maintenance are extremely important in orde…	0		#N/A	#N/A	#N/A							0
What's important for me to know about the safety of smart garage door openers?	81_7	What do you think about the smart version 's security ?	On September 14, 2011, ESET Smart Security version 5.0 was released.	#N/A	0	What is the safety of a smart one ?	Smart firearms safety technology is intended to prevent the accidental use and misuse of firearms by children and teens, as well as reducing accidental discharges or the use of a firearm against its owner if the firearm is stolen or taken away. Smart guns may also reduce incidents of suicide by unauthorized users of a firearm.	#N/A	0	What are some safety tips for using smart ones ?	Several types of smart pointers exist. Some work with reference counting, others by assigning ownership of an object to one pointer. If a language supports automatic garbage collection (for example, Java or [[C Sharp (programming language)|C#]]), then smart pointers are unneeded for the reclaiming and safety aspects of memory management, yet are useful for other purposes, such as cache data struc…	#N/A	0	What 's important for me to know about the safety of a smart garage door opener ?	Safety Information. A garage door is one of the largest moving objects in your home, and is typically used every day, giving you good reason to keep it in proper working order. Overhead Door is dedicated to providing safe and reliable products that last for many years. We would like to offer the following practical tips for keeping your garage doors and openers in safe, proper working order.	0		7	FALSE	81_7_CAR_c30915ee53931ab9b6c47abecdfd9264a1e92883	CAR_c30915ee53931ab9b6c47abecdfd9264a1e92883	81_7_CAR_f84d63bf2d994bad804783a35521d0f68cb7e287	CAR_f84d63bf2d994bad804783a35521d0f68cb7e287	81_7_CAR_5b89878da1b28e5c71af1639ad33e87af36310a0	CAR_5b89878da1b28e5c71af1639ad33e87af36310a0		What's important for me to know about the safety of smart garage door openers?	MARCO_7246606	81_7_MARCO_7246606	Safety Information. A garage door is one of the largest moving objects in your home, and is typically used every day, giving you good reason to keep it in proper working order. Overhead Door is dedicated to providing safe and reliable products that last for many years. We would like to offer the following practical tips for keeping your garage doors and openers in safe, proper working order.	0		#N/A	#N/A	#N/A							0
What's important for me to know about the safety of smart garage door openers?	81_7	What do you think about the smart version 's security ?	On October 13, 2015, ESET Smart Security version 9.0 was released.	#N/A	0	What is the safety of a smart one ?	The Smart Fortwo uses a very small front crumple zone. The second generation Smart Fortwo has been awarded 4 out of 5 stars in the Euro NCAP Adult Occupant Protection and 2 out of 4 stars in the Pedestrian protection test, but was not tested for Child Occupant Protection as it has no rear seats. The original Smart was awarded 3 out of 5 stars for Adult Occupant Protection. In American tests using…	#N/A	0	What are some safety tips for using smart ones ?	In our ever-changing hi-technology world it seems like everyone is turning to âsmartâ technology. From the phone and tablet you carry in your pocket to controlling your homeâs heating and air conditioning while away on vacation on a tropical beach, smart technology is everywhere.. Saving energy and controlling safety in the kitchen: Many homeowners think that smart technology is only for pe…	#N/A	0	What 's important for me to know about the safety of a smart garage door opener ?	Safety Features to keep in mind when buying a new garage door: 1 Tamper Resistant (Safety Feature) - Brackets at the bottom reduce your risk of injury form other door components. 2 Pinch Resistant (Safety Feature) - If fingers are too close to the door, pinch resistance will push them out of the way.	0		7	FALSE	81_7_CAR_1aa786f3bdd2ba2625f771615a24d8ea0df53124	CAR_1aa786f3bdd2ba2625f771615a24d8ea0df53124	81_7_CAR_6f561805843e21a823e7a388d7aaa483a1812b62	CAR_6f561805843e21a823e7a388d7aaa483a1812b62	81_7_MARCO_502611	MARCO_502611		What's important for me to know about the safety of smart garage door openers?	MARCO_1248461	81_7_MARCO_1248461	All garage door openers manufactured since 1993 require some form of safety device to protect people, pets and objects from injury or damage if they are in the doorâs path. The beam must be located at least 5 inches, but not more than 6 inches, from the floor.	0		#N/A	#N/A	#N/A							0
How could smart garage door openers be hacked?	81_8	How can a smart garage door opener be hacked ?	Many garage door opener remote controls use fixed-code encoding which use DIP switches or soldering to do the address pins coding process, and they usually use pt2262/pt2272 or compatible ICs. For these fixed-code garage door opener remotes, one can easily clone the existing remote using a self-learning remote control duplicator (copy remote) which can make a copy of the remote using face-to-face…	0		How do hackers get through the security of a smart garage door opener ?	The second stage of the wireless garage door opener system dealt with the shared frequency problem. To rectify this, multicode systems were developed. These systems required a garage door owner to preset a digital code by switching eight to twelve DIP switches on the receiver and transmitter. While these switches provided garage door systems with 2 = 256 to 2 = 4,096 different codes, they were no…	0		How can you break through the security of a smart garage door opener ?	The second stage of the wireless garage door opener system dealt with the shared frequency problem. To rectify this, multicode systems were developed. These systems required a garage door owner to preset a digital code by switching eight to twelve DIP switches on the receiver and transmitter. While these switches provided garage door systems with 2 = 256 to 2 = 4,096 different codes, they were no…	0		How could a garage door opener be hacked ?	Many garage door opener remote controls use fixed-code encoding which use DIP switches or soldering to do the address pins coding process, and they usually use pt2262/pt2272 or compatible ICs. For these fixed-code garage door opener remotes, one can easily clone the existing remote using a self-learning remote control duplicator (copy remote) which can make a copy of the remote using face-to-face…	0		8	TRUE	81_8_CAR_539da063637196db5e8a5235eafd405563648029	CAR_539da063637196db5e8a5235eafd405563648029	81_8_CAR_f3e5086fb72bb6237d74c732e47c6d81e8b722ad	CAR_f3e5086fb72bb6237d74c732e47c6d81e8b722ad	81_8_CAR_f3e5086fb72bb6237d74c732e47c6d81e8b722ad	CAR_f3e5086fb72bb6237d74c732e47c6d81e8b722ad		How could smart garage door openers be hacked?	CAR_539da063637196db5e8a5235eafd405563648029	81_8_CAR_539da063637196db5e8a5235eafd405563648029	Liftmaster MyQ technology thatâs found in the latest Chamberlain and Liftmaster garage door opener models makes it possible. All you need is a MyQ equipped opener with 2 communication radios instead of 1, a connected Internet gateway device and a garage door opener app.	0		#N/A	#N/A	#N/A
How could smart garage door openers be hacked?	81_8	How can a smart garage door opener be hacked ?	Liftmaster MyQ technology thatâs found in the latest Chamberlain and Liftmaster garage door opener models makes it possible. All you need is a MyQ equipped opener with 2 communication radios instead of 1, a connected Internet gateway device and a garage door opener app.	1		How do hackers get through the security of a smart garage door opener ?	The third stage of garage door opener market uses a frequency spectrum range between 300-400 MHz and most of the transmitter/receivers rely on hopping or rolling code technology. This approach prevents criminals from recording a code and replaying it to open a garage door. Since the signal is supposed to be significantly different from that of any other garage door remote control, manufacturers c…	0		How can you break through the security of a smart garage door opener ?	The third stage of garage door opener market uses a frequency spectrum range between 300-400 MHz and most of the transmitter/receivers rely on hopping or rolling code technology. This approach prevents criminals from recording a code and replaying it to open a garage door. Since the signal is supposed to be significantly different from that of any other garage door remote control, manufacturers c…	0		How could a garage door opener be hacked ?	The second stage of the wireless garage door opener system dealt with the shared frequency problem. To rectify this, multicode systems were developed. These systems required a garage door owner to preset a digital code by switching eight to twelve DIP switches on the receiver and transmitter. While these switches provided garage door systems with 2 = 256 to 2 = 4,096 different codes, they were no…	0		8	TRUE	81_8_MARCO_7517890	MARCO_7517890	81_8_CAR_4bcfc03a15cd87582510aff3a259798e4bfcd8d3	CAR_4bcfc03a15cd87582510aff3a259798e4bfcd8d3	81_8_CAR_4bcfc03a15cd87582510aff3a259798e4bfcd8d3	CAR_4bcfc03a15cd87582510aff3a259798e4bfcd8d3		How could smart garage door openers be hacked?	CAR_f3e5086fb72bb6237d74c732e47c6d81e8b722ad	81_8_CAR_f3e5086fb72bb6237d74c732e47c6d81e8b722ad	Many garage door opener remote controls use fixed-code encoding which use DIP switches or soldering to do the address pins coding process, and they usually use pt2262/pt2272 or compatible ICs. For these fixed-code garage door opener remotes, one can easily clone the existing remote using a self-learning remote control duplicator (copy remote) which can make a copy of the remote using face-to-face…	0		#N/A	#N/A	#N/A
How could smart garage door openers be hacked?	81_8	How can a smart garage door opener be hacked ?	1 Press and release the âsmartâ button on garage door opener motor unit. 2 The smart indicator light will glow steadily for 30 seconds. 3 Within 30 seconds, enter a four digit personal identification number (PIN) of your choice on the keypad.	0		How do hackers get through the security of a smart garage door opener ?	To avoid giving them easy access to your garage, take the remote with you when you leave the car. The handiest way to do this is to replace your big remote with a small keychain version (sold at home centers or where you bought your garage door opener).Match the remote to the brand and year of your opener.Then follow the instructions for programming it.o avoid giving them easy access to your gara…	#N/A	0	How can you break through the security of a smart garage door opener ?	1 Press and release the âsmartâ button on garage door opener motor unit. 2 The smart indicator light will glow steadily for 30 seconds. 3 Within 30 seconds, enter a four digit personal identification number (PIN) of your choice on the keypad.	0		How could a garage door opener be hacked ?	The third stage of garage door opener market uses a frequency spectrum range between 300-400 MHz and most of the transmitter/receivers rely on hopping or rolling code technology. This approach prevents criminals from recording a code and replaying it to open a garage door. Since the signal is supposed to be significantly different from that of any other garage door remote control, manufacturers c…	0		8	TRUE	81_8_MARCO_7706626	MARCO_7706626	81_8_MARCO_888456	MARCO_888456	81_8_MARCO_7706626	MARCO_7706626		How could smart garage door openers be hacked?	CAR_4bcfc03a15cd87582510aff3a259798e4bfcd8d3	81_8_CAR_4bcfc03a15cd87582510aff3a259798e4bfcd8d3	The second stage of the wireless garage door opener system dealt with the shared frequency problem. To rectify this, multicode systems were developed. These systems required a garage door owner to preset a digital code by switching eight to twelve DIP switches on the receiver and transmitter. While these switches provided garage door systems with 2 = 256 to 2 = 4,096 different codes, they were no…	0		#N/A	#N/A	#N/A
I would like to learn about GMO Food labeling.	82_1	What is the purpose of GMO food labels ?	GMO Foods Should be Labeled. We have the Right to Know What is in Our Food. One of the most dangerous and least understood experiments with human health the world has ever known is currently underway without your consentâin your household and households across the nation, indeed throughout our entire planet.n contrast, GMO labeling should be required on all food packaging. GMO Labeling Is Key t…	1		What can you tell me about GMO food labels GMO ?	Genetically Modified Foods: Truth about Labeling. There is significant misinformation and confusion about genetically modified foods (or GMOs), which now make up a major part of the American diet.Anti-GMO activists are seeking to combat GMOs by pushing for labeling mandates on the state and federal levels.here is significant misinformation and confusion about genetically modified foods (or GMOs),…	2		What is the use of GMO Food labeling ?	Proponents argue that approved GMO food has undergone extensive testing, is “safe” and that basically labeling is unnecessary. Labeling may discourage consumers to use GMO products when such a choice may be irrational. A lot of consumers express fears that have not been substantiated by science.	2		I would like to learn about GMO Food labeling .	GMO Foods Should be Labeled. We have the Right to Know What is in Our Food. One of the most dangerous and least understood experiments with human health the world has ever known is currently underway without your consentâin your household and households across the nation, indeed throughout our entire planet.ur right to know what is in the food we are buying and our right to choose our preferred…	1		9	FALSE	82_1_MARCO_5970602	MARCO_5970602	82_1_MARCO_3674272	MARCO_3674272	82_1_CAR_bafb3c1c72e23c444e182cac4e0ea9e4330d21c9	CAR_bafb3c1c72e23c444e182cac4e0ea9e4330d21c9		I would like to learn about GMO Food labeling.	MARCO_1209359	82_1_MARCO_1209359	GMO Foods Should be Labeled. We have the Right to Know What is in Our Food. One of the most dangerous and least understood experiments with human health the world has ever known is currently underway without your consentâin your household and households across the nation, indeed throughout our entire planet.n contrast, GMO labeling should be required on all food packaging. GMO Labeling Is Key t…	1		#N/A	#N/A	#N/A
I would like to learn about GMO Food labeling.	82_1	What is the purpose of GMO food labels ?	GMO Foods Should be Labeled. We have the Right to Know What is in Our Food. One of the most dangerous and least understood experiments with human health the world has ever known is currently underway without your consentâin your household and households across the nation, indeed throughout our entire planet.	1		What can you tell me about GMO food labels GMO ?	These days more and more consumers are looking for ways to avoid genetically modified organisms (GMOs) in their food. There are currently two food labels that indicate the absence of GMOs for consumers: the USDA Organic label and the Non-GMO Project Verified seal. GMOs, toxic pesticides, synthetic fertilizers, and artificial colors & flavors are all prohibited under USDA organic regulations.	2		What is the use of GMO Food labeling ?	No chemicals are involved. [ Read Andrew Kimbrell: The Case for Labeling GMOs ]. Farmers have been using GMOs for nearly 20 years, and between 70 percent and 80 percent of the food you consume contains GM ingredients.The use of this technology ensures farmers can grow more food, fend off infestations and recover from drought faster.GM technology also helps to keep food prices lower.armers have be…	1		I would like to learn about GMO Food labeling .	GMO Foods Should be Labeled. We have the Right to Know What is in Our Food. One of the most dangerous and least understood experiments with human health the world has ever known is currently underway without your consentâin your household and households across the nation, indeed throughout our entire planet.n contrast, GMO labeling should be required on all food packaging. GMO Labeling Is Key t…	1		9	FALSE	82_1_MARCO_68667	MARCO_68667	82_1_MARCO_3851669	MARCO_3851669	82_1_MARCO_6914068	MARCO_6914068		I would like to learn about GMO Food labeling.	MARCO_5970602	82_1_MARCO_5970602	GMO Foods Should be Labeled. We have the Right to Know What is in Our Food. One of the most dangerous and least understood experiments with human health the world has ever known is currently underway without your consentâin your household and households across the nation, indeed throughout our entire planet.ur right to know what is in the food we are buying and our right to choose our preferred…	1		#N/A	#N/A	#N/A
I would like to learn about GMO Food labeling.	82_1	What is the purpose of GMO food labels ?	Itâs a growing controversy: Should GMO foods always be labeled so consumers are aware that the product contains genetically modified ingredients? GMOsâor genetically modified organismsâare created in a lab by altering the genetic makeup of a plant or an animal.	1		What can you tell me about GMO food labels GMO ?	Genetically modified organisms (GMOs), also known as genetically modified or engineered foods, are created by forcing a piece of DNA from a totally different species, such as bacteria or viruses, into the DNA of a plant or animal.he biggest fear of these companies is that once GMOs are labeled, we won't want to eat them anymore. And that may happen, just like it did when we found out there was pi…	#N/A	1	What is the use of GMO Food labeling ?	While the FDA is responsible for protecting and promoting public health through the control and supervision of food safety, the agency holds the position that "the use of genetic engineering in the production of food does not present any safety concerns for such foods as a class", and , as there is "an absence of reliable data indicating safety concerns" with GMO foods as a class, voiced no oppos…	2		I would like to learn about GMO Food labeling .	GMO Foods Should be Labeled. We have the Right to Know What is in Our Food. One of the most dangerous and least understood experiments with human health the world has ever known is currently underway without your consentâin your household and households across the nation, indeed throughout our entire planet.t's wrong for government to deny us our right to know. Our right to know what is in the …	1		9	FALSE	82_1_MARCO_1975478	MARCO_1975478	82_1_MARCO_955186	MARCO_955186	82_1_CAR_079b57ca30ecc47091ed02ad70be30c7b6b20b36	CAR_079b57ca30ecc47091ed02ad70be30c7b6b20b36		I would like to learn about GMO Food labeling.	MARCO_955184	82_1_MARCO_955184	GMO Foods Should be Labeled. We have the Right to Know What is in Our Food. One of the most dangerous and least understood experiments with human health the world has ever known is currently underway without your consentâin your household and households across the nation, indeed throughout our entire planet.t's wrong for government to deny us our right to know. Our right to know what is in the …	1		#N/A	1	#N/A
What are the pros and cons of GMO food labeling?	82_2	What are some risks and benefits of GMO food labels ?	The most notable GMO risks to humans are the potential development of allergens to GM related crops and toxicity from GM crops. However, studies also show GM crops have benefits including the increased nutritional value in foods.	#N/A	0	What can be gained or lost by using GMO food labels ?	Proponents argue that approved GMO food has undergone extensive testing, is “safe” and that basically labeling is unnecessary. Labeling may discourage consumers to use GMO products when such a choice may be irrational. A lot of consumers express fears that have not been substantiated by science.	1		What are the advantages and disadvantages of GMO Food labeling ?	Proponents argue that approved GMO food has undergone extensive testing, is “safe” and that basically labeling is unnecessary. Labeling may discourage consumers to use GMO products when such a choice may be irrational. A lot of consumers express fears that have not been substantiated by science.	1		What are the pros and cons of GMO Food labeling ?	Proponents argue that approved GMO food has undergone extensive testing, is “safe” and that basically labeling is unnecessary. Labeling may discourage consumers to use GMO products when such a choice may be irrational. A lot of consumers express fears that have not been substantiated by science.	1		10	TRUE	82_2_MARCO_6092668	MARCO_6092668	82_2_CAR_bafb3c1c72e23c444e182cac4e0ea9e4330d21c9	CAR_bafb3c1c72e23c444e182cac4e0ea9e4330d21c9	82_2_CAR_bafb3c1c72e23c444e182cac4e0ea9e4330d21c9	CAR_bafb3c1c72e23c444e182cac4e0ea9e4330d21c9		What are the pros and cons of GMO food labeling?	CAR_bafb3c1c72e23c444e182cac4e0ea9e4330d21c9	82_2_CAR_bafb3c1c72e23c444e182cac4e0ea9e4330d21c9	Proponents argue that approved GMO food has undergone extensive testing, is “safe” and that basically labeling is unnecessary. Labeling may discourage consumers to use GMO products when such a choice may be irrational. A lot of consumers express fears that have not been substantiated by science.	1		0	#N/A	#N/A							0
What are the pros and cons of GMO food labeling?	82_2	What are some risks and benefits of GMO food labels ?	The most notable GMO risks to humans are the potential development of allergens to GM related crops and toxicity from GM crops. However, studies also show GM crops have benefits including the increased nutritional value in foods. \\ Improved from initial draft.	#N/A	0	What can be gained or lost by using GMO food labels ?	Many people, even in the world of Natural Foods, donât know what a GMO is, let alone which crops and processed ingredients are high-risk. As such, labeling only products that contain high-risk ingredients could give an unfair competitive advantage to products that contain ingredients containing corn, soy, etc.	1		What are the advantages and disadvantages of GMO Food labeling ?	GMO stands for genetically modified organisms. These are living things that have been changed via genetic engineering. Regardless of the advantages and disadvantages of GMO the main goal of making GMOs is to mix the helpful genes of various organisms in a single organism, frequently to be consumed as a source of food.In agriculture, GMOs actually have a lot of benefnts.On Preventing Disease and I…	#N/A	0	What are the pros and cons of GMO Food labeling ?	Brief Synopsis: Genetically modified foods information including list of GM foods with dna changes and pros and cons of GM food. Any politician or scientist who tells you these products are safe is either very stupid or lying.The hazards of these foods are uncertain.he benefits of genetically modified food crops include being able to breed disease resistant crops and herbicide tolerant strains. G…	0		10	TRUE	82_2_MARCO_6092669	MARCO_6092669	82_2_MARCO_232733	MARCO_232733	82_2_MARCO_3381366	MARCO_3381366		What are the pros and cons of GMO food labeling?	MARCO_1227831	82_2_MARCO_1227831	Brief Synopsis: Genetically modified foods information including list of GM foods with dna changes and pros and cons of GM food. Any politician or scientist who tells you these products are safe is either very stupid or lying.The hazards of these foods are uncertain.he benefits of genetically modified food crops include being able to breed disease resistant crops and herbicide tolerant strains. G…	0		0	#N/A	#N/A							0
What are the pros and cons of GMO food labeling?	82_2	What are some risks and benefits of GMO food labels ?	With every alleged GMO health risk, there are counterarguments either opposing health risk claims or suggesting GMOs provide more benefits than harm. The most notable GMO risks to humans are the potential development of allergens to GM related crops and toxicity from GM crops.	#N/A	0	What can be gained or lost by using GMO food labels ?	They are not. (The GMO-fearing can seek out â100 Percent Organicâ products, indicating that a food contains no genetically modified ingredients, among other requirements.). Many people argue for GMO labels in the name of increased consumer choice.On the contrary, such labels have limited people's options.round 70 percent of processed foods in the U.S. contain genetically modified ingredients.…	2		What are the advantages and disadvantages of GMO Food labeling ?	Disadvantages of GMOs. 1. GMOs could be dangerous to some insects. This is because the new genes of the crops can be deadly to certain insects like butterflies that are not actually dangerous to crops. 2.The people who oppose GMOs arenât taste good as compared to naturally produced crops. 3.isadvantages of GMOs. 1. GMOs could be dangerous to some insects. This is because the new genes of the cr…	#N/A	0	What are the pros and cons of GMO Food labeling ?	Pro: private label products are GMO-free. Con: private label products are manufactured by Ralcorp, whose parent corporation ConAgra donated $1.17 million to oppose GMO labeling. If Trader Joeâs is your best option for buying organic food on a limited food budget, I will never discourage that kind of logic.	0		10	TRUE	82_2_MARCO_6092671	MARCO_6092671	82_2_MARCO_3674279	MARCO_3674279	82_2_MARCO_6435686	MARCO_6435686		What are the pros and cons of GMO food labeling?	MARCO_3311529	82_2_MARCO_3311529	Pro: private label products are GMO-free. Con: private label products are manufactured by Ralcorp, whose parent corporation ConAgra donated $1.17 million to oppose GMO labeling. If Trader Joeâs is your best option for buying organic food on a limited food budget, I will never discourage that kind of logic.	0		0	#N/A	#N/A							0
What are the cons of GMO food labeling?	82_3	What are the issues regarding GMO food labels ?	One of the key issues concerning regulators is whether GM products should be labeled. Labeling of GMO products in the marketplace is required in 64 countries. Labeling can be mandatory up to a threshold GM content level (which varies between countries) or voluntary. A study investigating voluntary labeling in South Africa found that 31% of products labeled as GMO-free had a GM content above 1.0%.…	0		What are the risks of using GMO food labels ?	The most notable GMO risks to humans are the potential development of allergens to GM related crops and toxicity from GM crops. However, studies also show GM crops have benefits including the increased nutritional value in foods.	#N/A	0	Why should we not label GMO food ?	Why the GMO food provider is not looking to add labels to the such food. This question must be answered. Everything from a small candy to the Drink have ingrediats label patsed o print with it so consumer would know that what they are eating. Government has to ask to add labels to the GMO food.here have been NO long-term studies conducted on the safety of genetically engineered foods on humans. T…	0		And what about the cons of GMO Food labeling ?	Proponents argue that approved GMO food has undergone extensive testing, is “safe” and that basically labeling is unnecessary. Labeling may discourage consumers to use GMO products when such a choice may be irrational. A lot of consumers express fears that have not been substantiated by science.	2		11	FALSE	82_3_CAR_127c8f0e34a6b25f92f6e8c089fa4a79620d381c	CAR_127c8f0e34a6b25f92f6e8c089fa4a79620d381c	82_3_MARCO_6092668	MARCO_6092668	82_3_MARCO_955187	MARCO_955187		What are the cons of GMO food labeling?	CAR_bafb3c1c72e23c444e182cac4e0ea9e4330d21c9	82_3_CAR_bafb3c1c72e23c444e182cac4e0ea9e4330d21c9	Proponents argue that approved GMO food has undergone extensive testing, is “safe” and that basically labeling is unnecessary. Labeling may discourage consumers to use GMO products when such a choice may be irrational. A lot of consumers express fears that have not been substantiated by science.	2		#N/A	0	#N/A
What are the cons of GMO food labeling?	82_3	What are the issues regarding GMO food labels ?	One of the key issues concerning regulators is whether GM products should be labeled. Labeling can be mandatory up to a threshold GM content level (which varies between countries) or voluntary. A study investigating voluntary labeling in South Africa found that 31% of products labeled as GMO-free had a GM content above 1.0%. In Canada and the United States labeling of GM food is voluntary, while …	0		What are the risks of using GMO food labels ?	The most notable GMO risks to humans are the potential development of allergens to GM related crops and toxicity from GM crops. However, studies also show GM crops have benefits including the increased nutritional value in foods. \\ Improved from initial draft.	#N/A	0	Why should we not label GMO food ?	So they can avoid the âfrankenfoodsâ. This is why the GMO foods are not labeled now and why getting the GMO label on cans and boxes will be all but impossible. What we really need is a way to label food based on itâs nutrition content or taste.The current labels are based on old data which were averages and guesses.o they can avoid the âfrankenfoodsâ. This is why the GMO foods are not l…	0		And what about the cons of GMO Food labeling ?	The Organic Consumers Association, and the Union of Concerned Scientists, and Greenpeace stated that risks have not been adequately identified and managed, and they have questioned the objectivity of regulatory authorities. Some health groups say there are unanswered questions regarding the potential long-term impact on human health from food derived from GMOs, and propose mandatory labeling or a…	0		11	FALSE	82_3_CAR_11a62de61f9acb61e79afcc17bc051aebeea4f8e	CAR_11a62de61f9acb61e79afcc17bc051aebeea4f8e	82_3_MARCO_6092669	MARCO_6092669	82_3_MARCO_5970609	MARCO_5970609		What are the cons of GMO food labeling?	CAR_fafcd032f0865dec65bb0ea7418afbd56c0ddb2e	82_3_CAR_fafcd032f0865dec65bb0ea7418afbd56c0ddb2e	The Organic Consumers Association, and the Union of Concerned Scientists, and Greenpeace stated that risks have not been adequately identified and managed, and they have questioned the objectivity of regulatory authorities. Some health groups say there are unanswered questions regarding the potential long-term impact on human health from food derived from GMOs, and propose mandatory labeling or a…	0		#N/A	0	#N/A
What are the cons of GMO food labeling?	82_3	What are the issues regarding GMO food labels ?	There is controversy over GMOs, especially with regard to their use in producing food. The dispute involves buyers, biotechnology companies, governmental regulators, nongovernmental organizations, and scientists. The key areas of controversy related to GMO food are whether GM food should be labeled, the role of government regulators, the effect of GM crops on health and the environment, the effec…	0		What are the risks of using GMO food labels ?	With every alleged GMO health risk, there are counterarguments either opposing health risk claims or suggesting GMOs provide more benefits than harm. The most notable GMO risks to humans are the potential development of allergens to GM related crops and toxicity from GM crops.	#N/A	0	Why should we not label GMO food ?	1 The patenting of foods, which has many possible ethical issues. 2 The regulatory process of the FDA in which GMO foods have been determined as substantially equivalent to non-GMO foods, as well as the only requirement for approval is a voluntary consultation from the corporation that created the food.ince GMO foods are not labeled, you cannot know if they contain GMOs. You can; however, know wh…	0		And what about the cons of GMO Food labeling ?	Genetically modified organisms (GMO) are organisms whose genetic material has been altered by genetic engineering techniques generally known as recombinant DNA technology. Genetic engineering has expanded the genes available to breeders to utilize in creating desired germlines for new crops. Increased durability, nutritional content, insect and virus resistance and herbicide tolerance are a few o…	0		11	FALSE	82_3_CAR_5baec6a2efbc901ee5c6680c81eeafed5a33addf	CAR_5baec6a2efbc901ee5c6680c81eeafed5a33addf	82_3_MARCO_6092671	MARCO_6092671	82_3_MARCO_1289719	MARCO_1289719		What are the cons of GMO food labeling?	CAR_14e62ec6fa1fb134487c7a2ce2a490b937880bb0	82_3_CAR_14e62ec6fa1fb134487c7a2ce2a490b937880bb0	Genetically modified organisms (GMO) are organisms whose genetic material has been altered by genetic engineering techniques generally known as recombinant DNA technology. Genetic engineering has expanded the genes available to breeders to utilize in creating desired germlines for new crops. Increased durability, nutritional content, insect and virus resistance and herbicide tolerance are a few o…	0		#N/A	#N/A	#N/A
What are the GMO food labeling rules in the EU?	82_4	What are the guidelines for GMO food labels in the EU ?	The coexistence has raised significant concern in many European countries and so EU law also requires that all GM food be traceable to its origin, and that all food with GM content greater than 0.9% be labelled. Due to high demand from European consumers for freedom of choice between GM and non-GM foods. EU regulations require measures to avoid mixing of foods and feed produced from GM crops and …	3		What are the EU regulations regarding GMO food labels ?	The regulations concerning the import and sale of GMOs for human and animal consumption grown outside the EU involve providing freedom of choice to the farmers and consumers. All food (including processed food) or feed which contains greater than 0.9% of approved GMOs must be labelled. Twice GMOs unapproved by the EC have arrived in the EU and been forced to return to their port of origin. The fi…	3		What are the European rules for GMO Food labeling ?	The coexistence has raised significant concern in many European countries and so EU law also requires that all GM food be traceable to its origin, and that all food with GM content greater than 0.9% be labelled. Due to high demand from European consumers for freedom of choice between GM and non-GM foods. EU regulations require measures to avoid mixing of foods and feed produced from GM crops and …	3		What are the EU rules regarding GMO Food labeling ?	The regulations concerning the import and sale of GMOs for human and animal consumption grown outside the EU involve providing freedom of choice to the farmers and consumers. All food (including processed food) or feed which contains greater than 0.9% of approved GMOs must be labelled. Twice GMOs unapproved by the EC have arrived in the EU and been forced to return to their port of origin. The fi…	3		12	TRUE	82_4_CAR_ef401a18f4f95523ee060e42b474d433f61b6cad	CAR_ef401a18f4f95523ee060e42b474d433f61b6cad	82_4_CAR_9727b05a936eee2b477f4fb5d5276da27dabd9d4	CAR_9727b05a936eee2b477f4fb5d5276da27dabd9d4	82_4_CAR_ef401a18f4f95523ee060e42b474d433f61b6cad	CAR_ef401a18f4f95523ee060e42b474d433f61b6cad		What are the GMO food labeling rules in the EU?	CAR_9727b05a936eee2b477f4fb5d5276da27dabd9d4	82_4_CAR_9727b05a936eee2b477f4fb5d5276da27dabd9d4	In the EU, if a food contains or consists of genetically modified organisms (GMOs), or contains ingredients produced from GMOs, this must be indicated on the label. For GM products sold 'loose', information must be displayed immediately next to the food to indicate that it is GM.	3		#N/A	#N/A	#N/A
What are the GMO food labeling rules in the EU?	82_4	What are the guidelines for GMO food labels in the EU ?	In the EU, if a food contains or consists of genetically modified organisms (GMOs), or contains ingredients produced from GMOs, this must be indicated on the label. For GM products sold 'loose', information must be displayed immediately next to the food to indicate that it is GM.	1		What are the EU regulations regarding GMO food labels ?	The coexistence has raised significant concern in many European countries and so EU law also requires that all GM food be traceable to its origin, and that all food with GM content greater than 0.9% be labelled. Due to high demand from European consumers for freedom of choice between GM and non-GM foods. EU regulations require measures to avoid mixing of foods and feed produced from GM crops and …	3		What are the European rules for GMO Food labeling ?	The regulations concerning the import and sale of GMOs for human and animal consumption grown outside the EU involve providing freedom of choice to the farmers and consumers. All food (including processed food) or feed which contains greater than 0.9% of approved GMOs must be labelled. Twice GMOs unapproved by the EC have arrived in the EU and been forced to return to their port of origin. The fi…	3		What are the EU rules regarding GMO Food labeling ?	The coexistence has raised significant concern in many European countries and so EU law also requires that all GM food be traceable to its origin, and that all food with GM content greater than 0.9% be labelled. Due to high demand from European consumers for freedom of choice between GM and non-GM foods. EU regulations require measures to avoid mixing of foods and feed produced from GM crops and …	3		12	TRUE	82_4_MARCO_6544234	MARCO_6544234	82_4_CAR_ef401a18f4f95523ee060e42b474d433f61b6cad	CAR_ef401a18f4f95523ee060e42b474d433f61b6cad	82_4_CAR_9727b05a936eee2b477f4fb5d5276da27dabd9d4	CAR_9727b05a936eee2b477f4fb5d5276da27dabd9d4		What are the GMO food labeling rules in the EU?	CAR_ef401a18f4f95523ee060e42b474d433f61b6cad	82_4_CAR_ef401a18f4f95523ee060e42b474d433f61b6cad	In the EU, if a food contains or consists of genetically modified organisms (GMOs), or contains ingredients produced from GMOs, this must be indicated on the label.	3		#N/A	#N/A	#N/A
What are the GMO food labeling rules in the EU?	82_4	What are the guidelines for GMO food labels in the EU ?	In the EU, if a food contains or consists of genetically modified organisms (GMOs), or contains ingredients produced from GMOs, this must be indicated on the label.	1		What are the EU regulations regarding GMO food labels ?	The EC Directorate-general for agriculture and rural development states that the regulations concerning the import and sale of GMOs for human and animal consumption grown outside the EU provide freedom of choice to farmers and consumers. All food (including processed food) or feed which contains greater than 0.9% of approved GMOs must be labelled. As of 2010 GMOs unapproved by the EC had been fou…	3		What are the European rules for GMO Food labeling ?	The EC Directorate-general for agriculture and rural development states that the regulations concerning the import and sale of GMOs for human and animal consumption grown outside the EU provide freedom of choice to farmers and consumers. All food (including processed food) or feed which contains greater than 0.9% of approved GMOs must be labelled. As of 2010 GMOs unapproved by the EC had been fou…	3		What are the EU rules regarding GMO Food labeling ?	In the EU, if a food contains or consists of genetically modified organisms (GMOs), or contains ingredients produced from GMOs, this must be indicated on the label. For GM products sold 'loose', information must be displayed immediately next to the food to indicate that it is GM.	1		12	TRUE	82_4_MARCO_6544237	MARCO_6544237	82_4_CAR_b7e5b8c1488a3f42fb16fbc5cbcd0790a56948de	CAR_b7e5b8c1488a3f42fb16fbc5cbcd0790a56948de	82_4_CAR_b7e5b8c1488a3f42fb16fbc5cbcd0790a56948de	CAR_b7e5b8c1488a3f42fb16fbc5cbcd0790a56948de		What are the GMO food labeling rules in the EU?	MARCO_6544234	82_4_MARCO_6544234	The regulations concerning the import and sale of GMOs for human and animal consumption grown outside the EU involve providing freedom of choice to the farmers and consumers. All food (including processed food) or feed which contains greater than 0.9% of approved GMOs must be labelled. Twice GMOs unapproved by the EC have arrived in the EU and been forced to return to their port of origin. The fi…	1		#N/A	#N/A	#N/A
Tell me about traceability tools for GMO foods in the EU.	82_5	How do traceability tools for GMO food work ?	Traceability does not rely solely on documentation. By biochemical means (polymerase chain reaction) even tiny traces of GMOs can be detected and identified—provided that suitable testing tools exist for the GMO assumed to be present. In the EU, such a tool must be part of the application documents for the approval for commercialisation. For most products and production stages, testing methods ar…	1		How are GMO food labels traced in the EU ?	The coexistence has raised significant concern in many European countries and so EU law also requires that all GM food be traceable to its origin, and that all food with GM content greater than 0.9% be labelled. Due to high demand from European consumers for freedom of choice between GM and non-GM foods. EU regulations require measures to avoid mixing of foods and feed produced from GM crops and …	3		How can the European rules trace GMO Food labeling ?	The coexistence has raised significant concern in many European countries and so EU law also requires that all GM food be traceable to its origin, and that all food with GM content greater than 0.9% be labelled. Due to high demand from European consumers for freedom of choice between GM and non-GM foods. EU regulations require measures to avoid mixing of foods and feed produced from GM crops and …	3		Tell me more about traceability tools for GMO Food .	The traceability of genetically modified organisms (GMOs) describes a system that ensures the forwarding of the identity of a GMO from its production to its final buyer. Traceability is an essential prerequisite for the co-existence of GM and non-GM foods, and for the freedom of choice for consumers.	0		13	FALSE	82_5_CAR_ef1121e0a382dca7bffdf33a03ed9e9657fe65f4	CAR_ef1121e0a382dca7bffdf33a03ed9e9657fe65f4	82_5_CAR_ef401a18f4f95523ee060e42b474d433f61b6cad	CAR_ef401a18f4f95523ee060e42b474d433f61b6cad	82_5_CAR_ef401a18f4f95523ee060e42b474d433f61b6cad	CAR_ef401a18f4f95523ee060e42b474d433f61b6cad		Tell me about traceability tools for GMO foods in the EU.	CAR_68d3c840e8a709c92de5a886d99ada2d27705252	82_5_CAR_68d3c840e8a709c92de5a886d99ada2d27705252	Traceability does not rely solely on documentation. By biochemical means (polymerase chain reaction) even tiny traces of GMOs can be detected and identified—provided that suitable testing tools exist for the GMO assumed to be present. In the EU, such a tool must be part of the application documents for the approval for commercialisation. For most products and production stages, testing methods ar…	0		#N/A	#N/A	#N/A
Tell me about traceability tools for GMO foods in the EU.	82_5	How do traceability tools for GMO food work ?	The traceability of genetically modified organisms (GMOs) describes a system that ensures the forwarding of the identity of a GMO from its production to its final buyer. Traceability is an essential prerequisite for the co-existence of GM and non-GM foods, and for the freedom of choice for consumers.	0		How are GMO food labels traced in the EU ?	The EU implemented regulations specifically governing co-existence and traceability. Traceability has become commonplace in the food and feed supply chains of most countries, but GMO traceability is more challenging given strict legal thresholds for unwanted mixing. Since 2001, conventional and organic food and feedstuffs can contain up to 0.9% of authorised modified material without carrying a G…	1		How can the European rules trace GMO Food labeling ?	The EU implemented regulations specifically governing co-existence and traceability. Traceability has become commonplace in the food and feed supply chains of most countries, but GMO traceability is more challenging given strict legal thresholds for unwanted mixing. Since 2001, conventional and organic food and feedstuffs can contain up to 0.9% of authorised modified material without carrying a G…	1		Tell me more about traceability tools for GMO Food .	Traceability does not rely solely on documentation. By biochemical means (polymerase chain reaction) even tiny traces of GMOs can be detected and identified—provided that suitable testing tools exist for the GMO assumed to be present. In the EU, such a tool must be part of the application documents for the approval for commercialisation. For most products and production stages, testing methods ar…	1		13	FALSE	82_5_CAR_68d3c840e8a709c92de5a886d99ada2d27705252	CAR_68d3c840e8a709c92de5a886d99ada2d27705252	82_5_CAR_ad707e094a5475b5b0a35ab384901cb37e750c7d	CAR_ad707e094a5475b5b0a35ab384901cb37e750c7d	82_5_CAR_ad707e094a5475b5b0a35ab384901cb37e750c7d	CAR_ad707e094a5475b5b0a35ab384901cb37e750c7d		Tell me about traceability tools for GMO foods in the EU.	CAR_ef1121e0a382dca7bffdf33a03ed9e9657fe65f4	82_5_CAR_ef1121e0a382dca7bffdf33a03ed9e9657fe65f4	The coexistence has raised significant concern in many European countries and so EU law also requires that all GM food be traceable to its origin, and that all food with GM content greater than 0.9% be labelled. Due to high demand from European consumers for freedom of choice between GM and non-GM foods. EU regulations require measures to avoid mixing of foods and feed produced from GM crops and …	1		#N/A	#N/A	#N/A
Tell me about traceability tools for GMO foods in the EU.	82_5	How do traceability tools for GMO food work ?	The traceability of GMOs is founded on two needs. First, consumers in many countries are reluctant to buy genetically modified foods, and are skeptical of the use of GM crops for animal feed. Consequently, the concept of co-existence has been developed to separate GM and non-GM supply chains, and is only possible if all purchasers along the production chain know what they are buying. Secondly, al…	0		How are GMO food labels traced in the EU ?	Traceability does not rely solely on documentation. By biochemical means (polymerase chain reaction) even tiny traces of GMOs can be detected and identified—provided that suitable testing tools exist for the GMO assumed to be present. In the EU, such a tool must be part of the application documents for the approval for commercialisation. For most products and production stages, testing methods ar…	1		How can the European rules trace GMO Food labeling ?	Traceability does not rely solely on documentation. By biochemical means (polymerase chain reaction) even tiny traces of GMOs can be detected and identified—provided that suitable testing tools exist for the GMO assumed to be present. In the EU, such a tool must be part of the application documents for the approval for commercialisation. For most products and production stages, testing methods ar…	1		Tell me more about traceability tools for GMO Food .	The coexistence has raised significant concern in many European countries and so EU law also requires that all GM food be traceable to its origin, and that all food with GM content greater than 0.9% be labelled. Due to high demand from European consumers for freedom of choice between GM and non-GM foods. EU regulations require measures to avoid mixing of foods and feed produced from GM crops and …	3		13	FALSE	82_5_CAR_a1dd57214ebef2a3beac6accde677a57d96f7da7	CAR_a1dd57214ebef2a3beac6accde677a57d96f7da7	82_5_CAR_ef1121e0a382dca7bffdf33a03ed9e9657fe65f4	CAR_ef1121e0a382dca7bffdf33a03ed9e9657fe65f4	82_5_CAR_ef1121e0a382dca7bffdf33a03ed9e9657fe65f4	CAR_ef1121e0a382dca7bffdf33a03ed9e9657fe65f4		Tell me about traceability tools for GMO foods in the EU.	CAR_ef401a18f4f95523ee060e42b474d433f61b6cad	82_5_CAR_ef401a18f4f95523ee060e42b474d433f61b6cad	The EU implemented regulations specifically governing co-existence and traceability. Traceability has become commonplace in the food and feed supply chains of most countries, but GMO traceability is more challenging given strict legal thresholds for unwanted mixing. Since 2001, conventional and organic food and feedstuffs can contain up to 0.9% of authorised modified material without carrying a G…	3		#N/A	#N/A	#N/A
What is the role of Co-Extra in GMO food traceability in the EU?	82_6	What are some uses of Co - Extra ?	While SIGMEA was focused on co-existence at the farm level, Co-Extra studies co-existence along the whole production chain, and has a second focus on the traceability of GMOs, since co-existence cannot work without traceability. To be able to monitor and enforce compliance with co-existence regulations, authorities require the ability to trace, detect and identify GMOs.	4		How is Co - Extra used to trace GMO food ?	While SIGMEA was focused on co-existence at the farm level, Co-Extra studies co-existence along the whole production chain, and has a second focus on the traceability of GMOs, since co-existence cannot work without traceability. To be able to monitor and enforce compliance with co-existence regulations, authorities require the ability to trace, detect and identify GMOs.	4		Does co - extra contribute to traceability of GMO Food ?	While SIGMEA was focused on co-existence at the farm level, Co-Extra studies co-existence along the whole production chain, and has a second focus on the traceability of GMOs, since co-existence cannot work without traceability. To be able to monitor and enforce compliance with co-existence regulations, authorities require the ability to trace, detect and identify GMOs.	4		What is the role of Co - Extra in traceability tools ?	With regard to supporting cost-effective documentary traceability, Co-Extra was aimed at devising reliable, analytical detection methods, and at establishing the most appropriate methods of collecting, organising and distributing information. A core programme objective was the provision, to all stakeholders of food and feed chains, of a central decision-support system incorporating all necessary …	4		14	TRUE	82_6_CAR_99cb05a98306c63eaee8b93701d3058fa478e2ff	CAR_99cb05a98306c63eaee8b93701d3058fa478e2ff	82_6_CAR_99cb05a98306c63eaee8b93701d3058fa478e2ff	CAR_99cb05a98306c63eaee8b93701d3058fa478e2ff	82_6_CAR_99cb05a98306c63eaee8b93701d3058fa478e2ff	CAR_99cb05a98306c63eaee8b93701d3058fa478e2ff		What is the role of Co-Extra in GMO food traceability in the EU?	CAR_c3b5e081e8f27c9de016dc54037c8c2208f1bbd6	82_6_CAR_c3b5e081e8f27c9de016dc54037c8c2208f1bbd6	Co-Extra was an EU-funded research programme on co-existence and traceability of genetically modified crops and their edible derivatives that ran from 2005-2009. It was granted €13.5 million under the Sixth Framework Programme of the European Union, and is conducted by more than 200 scientists in 52 organisations in 18 countries.	4		#N/A	#N/A	#N/A
What is the role of Co-Extra in GMO food traceability in the EU?	82_6	What are some uses of Co - Extra ?	For genetically modified (GM) rapeseed, researchers hoping to minimise the admixture of GM and non-GM crops are attempting to use cleistogamy to prevent gene flow. However, preliminary results from Co-Extra, a current project within the EU research program, show that although cleistogamy reduces gene flow, it is not at the moment a consistently reliable tool for biocontainment; due to a certain i…	3		How is Co - Extra used to trace GMO food ?	The coexistence has raised significant concern in many European countries and so EU law also requires that all GM food be traceable to its origin, and that all food with GM content greater than 0.9% be labelled. Due to high demand from European consumers for freedom of choice between GM and non-GM foods. EU regulations require measures to avoid mixing of foods and feed produced from GM crops and …	4		Does co - extra contribute to traceability of GMO Food ?	The coexistence has raised significant concern in many European countries and so EU law also requires that all GM food be traceable to its origin, and that all food with GM content greater than 0.9% be labelled. Due to high demand from European consumers for freedom of choice between GM and non-GM foods. EU regulations require measures to avoid mixing of foods and feed produced from GM crops and …	4		What is the role of Co - Extra in traceability tools ?	Co-Extra was an EU-funded research programme on co-existence and traceability of genetically modified crops and their edible derivatives that ran from 2005-2009. It was granted €13.5 million under the Sixth Framework Programme of the European Union, and is conducted by more than 200 scientists in 52 organisations in 18 countries.	4		14	TRUE	82_6_CAR_fd24e3d6d67f82cd49351ea0ad6dc08545c6ed60	CAR_fd24e3d6d67f82cd49351ea0ad6dc08545c6ed60	82_6_CAR_ef401a18f4f95523ee060e42b474d433f61b6cad	CAR_ef401a18f4f95523ee060e42b474d433f61b6cad	82_6_CAR_ef401a18f4f95523ee060e42b474d433f61b6cad	CAR_ef401a18f4f95523ee060e42b474d433f61b6cad		What is the role of Co-Extra in GMO food traceability in the EU?	CAR_8d02588a98fbc9b03520749daa022522dd2638d0	82_6_CAR_8d02588a98fbc9b03520749daa022522dd2638d0	While SIGMEA was focused on co-existence at the farm level, Co-Extra studies co-existence along the whole production chain, and has a second focus on the traceability of GMOs, since co-existence cannot work without traceability. To be able to monitor and enforce compliance with co-existence regulations, authorities require the ability to trace, detect and identify GMOs.	4		#N/A	#N/A	#N/A
What is the role of Co-Extra in GMO food traceability in the EU?	82_6	What are some uses of Co - Extra ?	Martell and Motekaitis (1992) use the most linear regions and exploit the difference in equivalence volumes between acid-side and base-side plots during an acid-base titration to estimate the adventitious CO content in the base solution. This is illustrated in the sample Gran plots of Figure 1. In that situation, the extra acid used to neutralize the carbonate, by double protonation, in volume	#N/A	0	How is Co - Extra used to trace GMO food ?	The EU implemented regulations specifically governing co-existence and traceability. Traceability has become commonplace in the food and feed supply chains of most countries, but GMO traceability is more challenging given strict legal thresholds for unwanted mixing. Since 2001, conventional and organic food and feedstuffs can contain up to 0.9% of authorised modified material without carrying a G…	4		Does co - extra contribute to traceability of GMO Food ?	The EU implemented regulations specifically governing co-existence and traceability. Traceability has become commonplace in the food and feed supply chains of most countries, but GMO traceability is more challenging given strict legal thresholds for unwanted mixing. Since 2001, conventional and organic food and feedstuffs can contain up to 0.9% of authorised modified material without carrying a G…	4		What is the role of Co - Extra in traceability tools ?	While SIGMEA was focused on co-existence at the farm level, Co-Extra studies co-existence along the whole production chain, and has a second focus on the traceability of GMOs, since co-existence cannot work without traceability. To be able to monitor and enforce compliance with co-existence regulations, authorities require the ability to trace, detect and identify GMOs.	4		14	TRUE	82_6_CAR_6e364afb1a6e92bab69ebff6561507f2fbcceb3d	CAR_6e364afb1a6e92bab69ebff6561507f2fbcceb3d	82_6_CAR_ad707e094a5475b5b0a35ab384901cb37e750c7d	CAR_ad707e094a5475b5b0a35ab384901cb37e750c7d	82_6_CAR_ad707e094a5475b5b0a35ab384901cb37e750c7d	CAR_ad707e094a5475b5b0a35ab384901cb37e750c7d		What is the role of Co-Extra in GMO food traceability in the EU?	CAR_99cb05a98306c63eaee8b93701d3058fa478e2ff	82_6_CAR_99cb05a98306c63eaee8b93701d3058fa478e2ff	The coexistence has raised significant concern in many European countries and so EU law also requires that all GM food be traceable to its origin, and that all food with GM content greater than 0.9% be labelled. Due to high demand from European consumers for freedom of choice between GM and non-GM foods. EU regulations require measures to avoid mixing of foods and feed produced from GM crops and …	4		#N/A	#N/A	#N/A							0
How is food tested for GMO contamination?	82_7	What tests are used to detect contamination in GMO food ?	Two evaluations, Comprehensive GMO Screen and Crop-specific Deep GMO Test are offered, which help food manufacturers to determine if there are any genetically modified components in their food products. This helps verify GMO-free labeling and address health risks for those with allergens. The process starts with DNA extraction to detect GMO traces, which are then tested for quality and finally as…	2		How is contamination of GMO food tested ?	Testing on GMOs in food and feed is routinely done using molecular techniques such as PCR and bioinformatics.	3		How do the European rules test for contamination of GMO Food ?	Traceability does not rely solely on documentation. By biochemical means (polymerase chain reaction) even tiny traces of GMOs can be detected and identified—provided that suitable testing tools exist for the GMO assumed to be present. In the EU, such a tool must be part of the application documents for the approval for commercialisation. For most products and production stages, testing methods ar…	2		How is testing done for contamination of GMO Food ?	Testing on GMOs in food and feed is routinely done using molecular techniques such as PCR and bioinformatics.	3		15	FALSE	82_7_CAR_7dc309882a647d5d1f9d2545979314c2f99f9c35	CAR_7dc309882a647d5d1f9d2545979314c2f99f9c35	82_7_CAR_7de0d63fe3bb0924d1a53b42f057a7695b39e718	CAR_7de0d63fe3bb0924d1a53b42f057a7695b39e718	82_7_CAR_ef1121e0a382dca7bffdf33a03ed9e9657fe65f4	CAR_ef1121e0a382dca7bffdf33a03ed9e9657fe65f4		How is food tested for GMO contamination?	CAR_7de0d63fe3bb0924d1a53b42f057a7695b39e718	82_7_CAR_7de0d63fe3bb0924d1a53b42f057a7695b39e718	Testing on GMOs in food and feed is routinely done using molecular techniques such as PCR and bioinformatics.	3		#N/A	#N/A	#N/A
How is food tested for GMO contamination?	82_7	What tests are used to detect contamination in GMO food ?	Testing on GMOs in food and feed is routinely done using molecular techniques such as PCR and bioinformatics.	3		How is contamination of GMO food tested ?	Two evaluations, Comprehensive GMO Screen and Crop-specific Deep GMO Test are offered, which help food manufacturers to determine if there are any genetically modified components in their food products. This helps verify GMO-free labeling and address health risks for those with allergens. The process starts with DNA extraction to detect GMO traces, which are then tested for quality and finally as…	2		How do the European rules test for contamination of GMO Food ?	Testing on GMOs in food and feed is routinely done using molecular techniques such as PCR and bioinformatics.	3		How is testing done for contamination of GMO Food ?	Two evaluations, Comprehensive GMO Screen and Crop-specific Deep GMO Test are offered, which help food manufacturers to determine if there are any genetically modified components in their food products. This helps verify GMO-free labeling and address health risks for those with allergens. The process starts with DNA extraction to detect GMO traces, which are then tested for quality and finally as…	2		15	FALSE	82_7_CAR_7de0d63fe3bb0924d1a53b42f057a7695b39e718	CAR_7de0d63fe3bb0924d1a53b42f057a7695b39e718	82_7_CAR_7dc309882a647d5d1f9d2545979314c2f99f9c35	CAR_7dc309882a647d5d1f9d2545979314c2f99f9c35	82_7_CAR_7de0d63fe3bb0924d1a53b42f057a7695b39e718	CAR_7de0d63fe3bb0924d1a53b42f057a7695b39e718		How is food tested for GMO contamination?	CAR_7dc309882a647d5d1f9d2545979314c2f99f9c35	82_7_CAR_7dc309882a647d5d1f9d2545979314c2f99f9c35	Two evaluations, Comprehensive GMO Screen and Crop-specific Deep GMO Test are offered, which help food manufacturers to determine if there are any genetically modified components in their food products. This helps verify GMO-free labeling and address health risks for those with allergens. The process starts with DNA extraction to detect GMO traces, which are then tested for quality and finally as…	2		#N/A	#N/A	#N/A
How is food tested for GMO contamination?	82_7	What tests are used to detect contamination in GMO food ?	The detection of genetically modified organisms in food or feed is possible by biochemical means. It can either be qualitative, showing which genetically modified organism (GMO) is present, or quantitative, measuring in which amount a certain GMO is present. Being able to detect a GMO is an important part of GMO labeling, as without detection methods the traceability of GMOs would rely solely on …	2		How is contamination of GMO food tested ?	GMO Testing. Six of our eight dairy farms source their non-GMO feed from Maysville Elevator in Apple Creek, OH. The remaining three farms grow their own feed. Every load of corn and soybeans used by Maysville Elevator is screened for GMO contamination using the Envirologix Quickscan Anlyzer before the load is received into their non-GMO storage bin.	2		How do the European rules test for contamination of GMO Food ?	The EC Directorate-general for agriculture and rural development states that the regulations concerning the import and sale of GMOs for human and animal consumption grown outside the EU provide freedom of choice to farmers and consumers. All food (including processed food) or feed which contains greater than 0.9% of approved GMOs must be labelled. As of 2010 GMOs unapproved by the EC had been fou…	0		How is testing done for contamination of GMO Food ?	GMO Testing. Six of our eight dairy farms source their non-GMO feed from Maysville Elevator in Apple Creek, OH. The remaining three farms grow their own feed. Every load of corn and soybeans used by Maysville Elevator is screened for GMO contamination using the Envirologix Quickscan Anlyzer before the load is received into their non-GMO storage bin.	2		15	FALSE	82_7_CAR_f623d3242c208ddd2671b53ffb56d657dc190ce3	CAR_f623d3242c208ddd2671b53ffb56d657dc190ce3	82_7_MARCO_6858684	MARCO_6858684	82_7_CAR_b7e5b8c1488a3f42fb16fbc5cbcd0790a56948de	CAR_b7e5b8c1488a3f42fb16fbc5cbcd0790a56948de		How is food tested for GMO contamination?	MARCO_6858684	82_7_MARCO_6858684	The detection of genetically modified organisms in food or feed is possible by biochemical means. It can either be qualitative, showing which genetically modified organism (GMO) is present, or quantitative, measuring in which amount a certain GMO is present. Being able to detect a GMO is an important part of GMO labeling, as without detection methods the traceability of GMOs would rely solely on …	2		#N/A	#N/A	#N/A
What's the difference between the European Union and United States approaches to testing for GMO food contamination?	82_8	Where does the European approach to traceability of GMO food labels differ from that of the United States ?	The approaches taken by governments to assess and manage the risks associated with the use of genetic engineering technology and the development and release of genetically modified organisms (GMOs) vary from country to country, with some of the most marked differences occurring between the United States and Europe. The U.S. regulatory policy is governed by the Coordinated Framework for Regulation…	2		How different are the European standards for GMO food from the ones in the US ?	One key area where the US and EU differ is genetically modified foods. The EU has some of the strictest GM regulations in the world and has authorised just 52 GM foods to date. The US, on the other hand, is the largest commercial grower of GM crops in the world. There is also concern that US producers will be able to sell their meat in European markets, even though it is produced to different sta…	2		What are the differences between the European Union and the United States in regards to GMO Food labeling ?	One key area where the US and EU differ is genetically modified foods. The EU has some of the strictest GM regulations in the world and has authorised just 52 GM foods to date. The US, on the other hand, is the largest commercial grower of GM crops in the world. There is also concern that US producers will be able to sell their meat in European markets, even though it is produced to different sta…	2		What 's the difference between the European and US approaches to GMO Food labeling ?	The European Union has heavily contrasted its regulations and restrictions regarding genetic engineering compared to those of the United States. The European Parliament's Committee on the Environmental, Public Health, and Consumer Protection pushed forward and adopted a "safety first" principle regarding the case of GMOs, calling for any negative health consequences from GMOs to be held liable. O…	2		16	TRUE	82_8_CAR_f44b3e532f818ccad971a360fdb5de3a41cb4243	CAR_f44b3e532f818ccad971a360fdb5de3a41cb4243	82_8_MARCO_4027034	MARCO_4027034	82_8_MARCO_4027034	MARCO_4027034		What's the difference between the European Union and United States approaches to testing for GMO food contamination?	CAR_7c2fcb9edebb92e131fad5241c0630399d3a1884	82_8_CAR_7c2fcb9edebb92e131fad5241c0630399d3a1884	The European Union has heavily contrasted its regulations and restrictions regarding genetic engineering compared to those of the United States. The European Parliament's Committee on the Environmental, Public Health, and Consumer Protection pushed forward and adopted a "safety first" principle regarding the case of GMOs, calling for any negative health consequences from GMOs to be held liable. O…	2		#N/A	#N/A	#N/A
What's the difference between the European Union and United States approaches to testing for GMO food contamination?	82_8	Where does the European approach to traceability of GMO food labels differ from that of the United States ?	The European Union has heavily contrasted its regulations and restrictions regarding genetic engineering compared to those of the United States. The European Parliament's Committee on the Environmental, Public Health, and Consumer Protection pushed forward and adopted a "safety first" principle regarding the case of GMOs, calling for any negative health consequences from GMOs to be held liable. O…	2		How different are the European standards for GMO food from the ones in the US ?	The European Union has heavily contrasted its regulations and restrictions regarding genetic engineering compared to those of the United States. The European Parliament's Committee on the Environmental, Public Health, and Consumer Protection pushed forward and adopted a "safety first" principle regarding the case of GMOs, calling for any negative health consequences from GMOs to be held liable. O…	2		What are the differences between the European Union and the United States in regards to GMO Food labeling ?	The European Union has heavily contrasted its regulations and restrictions regarding genetic engineering compared to those of the United States. The European Parliament's Committee on the Environmental, Public Health, and Consumer Protection pushed forward and adopted a "safety first" principle regarding the case of GMOs, calling for any negative health consequences from GMOs to be held liable. O…	2		What 's the difference between the European and US approaches to GMO Food labeling ?	The approaches taken by governments to assess and manage the risks associated with the use of genetic engineering technology and the development and release of genetically modified organisms (GMOs) vary from country to country, with some of the most marked differences occurring between the United States and Europe. The U.S. regulatory policy is governed by the Coordinated Framework for Regulation…	2		16	TRUE	82_8_CAR_7c2fcb9edebb92e131fad5241c0630399d3a1884	CAR_7c2fcb9edebb92e131fad5241c0630399d3a1884	82_8_CAR_7c2fcb9edebb92e131fad5241c0630399d3a1884	CAR_7c2fcb9edebb92e131fad5241c0630399d3a1884	82_8_CAR_7c2fcb9edebb92e131fad5241c0630399d3a1884	CAR_7c2fcb9edebb92e131fad5241c0630399d3a1884		What's the difference between the European Union and United States approaches to testing for GMO food contamination?	CAR_f44b3e532f818ccad971a360fdb5de3a41cb4243	82_8_CAR_f44b3e532f818ccad971a360fdb5de3a41cb4243	The approaches taken by governments to assess and manage the risks associated with the use of genetic engineering technology and the development and release of genetically modified organisms (GMOs) vary from country to country, with some of the most marked differences occurring between the United States and Europe. The U.S. regulatory policy is governed by the Coordinated Framework for Regulation…	2		#N/A	#N/A	#N/A
What's the difference between the European Union and United States approaches to testing for GMO food contamination?	82_8	Where does the European approach to traceability of GMO food labels differ from that of the United States ?	The regulatory approach used in Europe requires new and separate laws that are specific to genetically engineered (âGMOâ) foods and crops. By contrast, the United States regulates GMOs for food safety and for environmental safety using the laws that were already in place to govern non-GMO foods and crops. â¢	2		How different are the European standards for GMO food from the ones in the US ?	The approaches taken by governments to assess and manage the risks associated with the use of genetic engineering technology and the development and release of genetically modified organisms (GMOs) vary from country to country, with some of the most marked differences occurring between the United States and Europe. The U.S. regulatory policy is governed by the Coordinated Framework for Regulation…	2		What are the differences between the European Union and the United States in regards to GMO Food labeling ?	The approaches taken by governments to assess and manage the risks associated with the use of genetic engineering technology and the development and release of genetically modified organisms (GMOs) vary from country to country, with some of the most marked differences occurring between the United States and Europe. The U.S. regulatory policy is governed by the Coordinated Framework for Regulation…	2		What 's the difference between the European and US approaches to GMO Food labeling ?	The regulatory approach used in Europe requires new and separate laws that are specific to genetically engineered (âGMOâ) foods and crops. By contrast, the United States regulates GMOs for food safety and for environmental safety using the laws that were already in place to govern non-GMO foods and crops. â¢	2		16	TRUE	82_8_MARCO_6858676	MARCO_6858676	82_8_CAR_f44b3e532f818ccad971a360fdb5de3a41cb4243	CAR_f44b3e532f818ccad971a360fdb5de3a41cb4243	82_8_CAR_f44b3e532f818ccad971a360fdb5de3a41cb4243	CAR_f44b3e532f818ccad971a360fdb5de3a41cb4243		What's the difference between the European Union and United States approaches to testing for GMO food contamination?	MARCO_6858676	82_8_MARCO_6858676	When producers, importers or authorities test a sample for the unintended presence of GMOs, they usually do not know which GMO to expect. While EU authorities prefer an event-specific approach to this problem, US authorities rely on construct-specific test schemes.	2		#N/A	#N/A	#N/A
How does the DNA-based method work for testing GMO contamination.	82_9	What are the pros and cons of using the DNA - based method to detect contamination in GMO food ?	The construct-specific detection methods can either be DNA or protein based. DNA based detection looks for a part of the foreign DNA inserted in a GMO. For technical reasons, certain DNA sequences are shared by several GMOs. Protein-based methods detect the product of the transgene, for example the Bt toxin. Since different GMOs may produce the same protein, construct-specific detection can test …	4		What is the DNA - based method for tracing GMO food ?	The construct-specific detection methods can either be DNA or protein based. DNA based detection looks for a part of the foreign DNA inserted in a GMO. For technical reasons, certain DNA sequences are shared by several GMOs. Protein-based methods detect the product of the transgene, for example the Bt toxin. Since different GMOs may produce the same protein, construct-specific detection can test …	4		How is the DNA - based method used to test for contamination ?	The method works by pairing the targeted genetic sequence with custom designed complementary bits of DNA called primers. In the presence of the target sequence, the primers match with it and trigger a chain reaction. DNA replication enzymes use the primers as docking points and start doubling the target sequences. The process is repeated over and over again by sequential heating and cooling until…	4		How does the DNA - based method work ?	The method works by pairing the targeted genetic sequence with custom designed complementary bits of DNA called primers. In the presence of the target sequence, the primers match with it and trigger a chain reaction. DNA replication enzymes use the primers as docking points and start doubling the target sequences. The process is repeated over and over again by sequential heating and cooling until…	4		17	FALSE	82_9_CAR_5669ae19c48aee4d3cb399c9fac8fb123be5aa7e	CAR_5669ae19c48aee4d3cb399c9fac8fb123be5aa7e	82_9_CAR_5669ae19c48aee4d3cb399c9fac8fb123be5aa7e	CAR_5669ae19c48aee4d3cb399c9fac8fb123be5aa7e	82_9_CAR_e134a98652b4935b8f13591fad796ff746095331	CAR_e134a98652b4935b8f13591fad796ff746095331		How does the DNA-based method work for testing GMO contamination.	CAR_e134a98652b4935b8f13591fad796ff746095331	82_9_CAR_e134a98652b4935b8f13591fad796ff746095331	The method works by pairing the targeted genetic sequence with custom designed complementary bits of DNA called primers. In the presence of the target sequence, the primers match with it and trigger a chain reaction. DNA replication enzymes use the primers as docking points and start doubling the target sequences. The process is repeated over and over again by sequential heating and cooling until…	4		#N/A	#N/A	#N/A
How does the DNA-based method work for testing GMO contamination.	82_9	What are the pros and cons of using the DNA - based method to detect contamination in GMO food ?	Currently, it is highly unlikely that the presence of unexpected or even unknown GMOs will be detected, since either the DNA sequence of the transgene or its product, the protein, must be known for detection. In addition, even testing for known GMOs is time-consuming and costly, as current reliable detection methods can test for only one GMO at a time. Therefore, research programmes such as Co-Ex…	4		What is the DNA - based method for tracing GMO food ?	The method works by pairing the targeted genetic sequence with custom designed complementary bits of DNA called primers. In the presence of the target sequence, the primers match with it and trigger a chain reaction. DNA replication enzymes use the primers as docking points and start doubling the target sequences. The process is repeated over and over again by sequential heating and cooling until…	4		How is the DNA - based method used to test for contamination ?	In September 2000, safety experts from the Massachusetts Institute of Technology, Duke University, and Science Applications International Corporation reviewed the post-decontamination quality assurance test data and concluded that there was no evidence of any residual contamination in the building. The success of the decontamination was tested the following month, when examination of an additiona…	#N/A	0	How does the DNA - based method work ?	Although allozymes can detect variations in DNA, it is by an indirect method and not very accurate. DNA-based markers were developed in the 1960s. These markers are much more effective at distinguishing between DNA variants. Today these are the most commonly used markers. DNA-based markers work by surveying nucleotides, which can serve a variety of functions, such as detecting differences in nucl…	0		17	FALSE	82_9_CAR_5ec97f5bb36766ccac7617b4461075adea603c35	CAR_5ec97f5bb36766ccac7617b4461075adea603c35	82_9_CAR_e134a98652b4935b8f13591fad796ff746095331	CAR_e134a98652b4935b8f13591fad796ff746095331	82_9_CAR_708ad8bae0510c5001d6d81aea6f0192ed2c83dc	CAR_708ad8bae0510c5001d6d81aea6f0192ed2c83dc		How does the DNA-based method work for testing GMO contamination.	CAR_b7ba16342e3ddcf5de055a00fb15c19afc40b78d	82_9_CAR_b7ba16342e3ddcf5de055a00fb15c19afc40b78d	The construct-specific detection methods can either be DNA or protein based. DNA based detection looks for a part of the foreign DNA inserted in a GMO. For technical reasons, certain DNA sequences are shared by several GMOs. Protein-based methods detect the product of the transgene, for example the Bt toxin. Since different GMOs may produce the same protein, construct-specific detection can test …	0		#N/A	#N/A	#N/A
How does the DNA-based method work for testing GMO contamination.	82_9	What are the pros and cons of using the DNA - based method to detect contamination in GMO food ?	The method works by pairing the targeted genetic sequence with custom designed complementary bits of DNA called primers. In the presence of the target sequence, the primers match with it and trigger a chain reaction. DNA replication enzymes use the primers as docking points and start doubling the target sequences. The process is repeated over and over again by sequential heating and cooling until…	4		What is the DNA - based method for tracing GMO food ?	Genetic modification involves insertion of foreign DNA into the nucleus of a normal cell where it integrates with the host DNA. Genetic analysis uses molecular techniques to detect the inserted transgenic DNA (GMO) in a sample. The method most commonly used for this purpose is PCR (Polymerase Chain Reaction). The PCR technique amplifies (copies) the DNA billions of times in order for detection an…	3		How is the DNA - based method used to test for contamination ?	Polymerase chain reaction (PCR) is a DNA based method of testing used to selectively target and replicate a specific region of DNA. Conventional PCR uses a forward and reverse primer containing nucleotides specifically arranged to compliment the target region of interest.	0		How does the DNA - based method work ?	The construct-specific detection methods can either be DNA or protein based. DNA based detection looks for a part of the foreign DNA inserted in a GMO. For technical reasons, certain DNA sequences are shared by several GMOs. Protein-based methods detect the product of the transgene, for example the Bt toxin. Since different GMOs may produce the same protein, construct-specific detection can test …	4		17	FALSE	82_9_CAR_e134a98652b4935b8f13591fad796ff746095331	CAR_e134a98652b4935b8f13591fad796ff746095331	82_9_MARCO_480559	MARCO_480559	82_9_MARCO_3466783	MARCO_3466783		How does the DNA-based method work for testing GMO contamination.	CAR_5669ae19c48aee4d3cb399c9fac8fb123be5aa7e	82_9_CAR_5669ae19c48aee4d3cb399c9fac8fb123be5aa7e	Primers bind to an area of the DNA near or within the GMO sequence such that only this area of the DNA genome is amplified. Because the primers are specific to the transgenic DNA sequence and because the DNA is amplified many billion-fold in this process, PCR is a highly sensitive and specific GMO detection method. There are various ways to detect GM DNA in a sample, based on the structure of the…	4		#N/A	#N/A	#N/A
How could Co-Extra improve DNA-based testing for GMO contamination?	82_10	Can Co - Extra make the DNA - based method more accurate ?	Currently, it is highly unlikely that the presence of unexpected or even unknown GMOs will be detected, since either the DNA sequence of the transgene or its product, the protein, must be known for detection. In addition, even testing for known GMOs is time-consuming and costly, as current reliable detection methods can test for only one GMO at a time. Therefore, research programmes such as Co-Ex…	4		Does Co - Extra improve the traceability of GMO food ?	While SIGMEA was focused on co-existence at the farm level, Co-Extra studies co-existence along the whole production chain, and has a second focus on the traceability of GMOs, since co-existence cannot work without traceability. To be able to monitor and enforce compliance with co-existence regulations, authorities require the ability to trace, detect and identify GMOs.	0		How can Co - Extra improve the DNA - based method used to test for contamination further ?	Currently, it is highly unlikely that the presence of unexpected or even unknown GMOs will be detected, since either the DNA sequence of the transgene or its product, the protein, must be known for detection. In addition, even testing for known GMOs is time-consuming and costly, as current reliable detection methods can test for only one GMO at a time. Therefore, research programmes such as Co-Ex…	4		How could Co - Extra improve the DNA - based method of testing for contamination ?	Currently, it is highly unlikely that the presence of unexpected or even unknown GMOs will be detected, since either the DNA sequence of the transgene or its product, the protein, must be known for detection. In addition, even testing for known GMOs is time-consuming and costly, as current reliable detection methods can test for only one GMO at a time. Therefore, research programmes such as Co-Ex…	4		18	TRUE	82_10_CAR_5ec97f5bb36766ccac7617b4461075adea603c35	CAR_5ec97f5bb36766ccac7617b4461075adea603c35	82_10_CAR_99cb05a98306c63eaee8b93701d3058fa478e2ff	CAR_99cb05a98306c63eaee8b93701d3058fa478e2ff	82_10_CAR_5ec97f5bb36766ccac7617b4461075adea603c35	CAR_5ec97f5bb36766ccac7617b4461075adea603c35		How could Co-Extra improve DNA-based testing for GMO contamination?	CAR_5ec97f5bb36766ccac7617b4461075adea603c35	82_10_CAR_5ec97f5bb36766ccac7617b4461075adea603c35	Currently, it is highly unlikely that the presence of unexpected or even unknown GMOs will be detected, since either the DNA sequence of the transgene or its product, the protein, must be known for detection. In addition, even testing for known GMOs is time-consuming and costly, as current reliable detection methods can test for only one GMO at a time. Therefore, research programmes such as Co-Ex…	4		#N/A	#N/A	#N/A
How could Co-Extra improve DNA-based testing for GMO contamination?	82_10	Can Co - Extra make the DNA - based method more accurate ?	A priori, RQ-PCR is likely to be more accurate and precise than the serial dilution method because male DNA percentages can be expressed as any value between 0% and 100% by RQ-PCR whereas, based on a fivefold dilution series, male DNA percentages can be scored only as one option among a discrete set of percentages, i.	#N/A	0	Does Co - Extra improve the traceability of GMO food ?	Co-Extra was an EU-funded research programme on co-existence and traceability of genetically modified crops and their edible derivatives that ran from 2005-2009. It was granted €13.5 million under the Sixth Framework Programme of the European Union, and is conducted by more than 200 scientists in 52 organisations in 18 countries.	0		How can Co - Extra improve the DNA - based method used to test for contamination further ?	Improving PCR based detection of GMOs is a further goal of the European research programme Co-Extra. Research is now underway to develop multiplex PCR methods that can simultaneously detect many different transgenic lines. Another major challenge is the increasing prevalence of transgenic crops with stacked traits. This refers to transgenic cultivars derived from crosses between transgenic parent…	4		How could Co - Extra improve the DNA - based method of testing for contamination ?	Improving PCR based detection of GMOs is a further goal of the European research programme Co-Extra. Research is now underway to develop multiplex PCR methods that can simultaneously detect many different transgenic lines. Another major challenge is the increasing prevalence of transgenic crops with stacked traits. This refers to transgenic cultivars derived from crosses between transgenic parent…	4		18	TRUE	82_10_MARCO_1790585	MARCO_1790585	82_10_CAR_8d02588a98fbc9b03520749daa022522dd2638d0	CAR_8d02588a98fbc9b03520749daa022522dd2638d0	82_10_CAR_fa6845f7274f80985362fd9bbe9895e92a55189a	CAR_fa6845f7274f80985362fd9bbe9895e92a55189a		How could Co-Extra improve DNA-based testing for GMO contamination?	CAR_fa6845f7274f80985362fd9bbe9895e92a55189a	82_10_CAR_fa6845f7274f80985362fd9bbe9895e92a55189a	Improving PCR based detection of GMOs is a further goal of the European research programme Co-Extra. Research is now underway to develop multiplex PCR methods that can simultaneously detect many different transgenic lines. Another major challenge is the increasing prevalence of transgenic crops with stacked traits. This refers to transgenic cultivars derived from crosses between transgenic parent…	4		#N/A	#N/A	#N/A							0
How could Co-Extra improve DNA-based testing for GMO contamination?	82_10	Can Co - Extra make the DNA - based method more accurate ?	In addition to agricultural measures, there may be also biological tools to prevent the genetically modified crop from fertilising conventional fields. Researchers are investigating methods either to prevent GM crops from producing pollen at all (for example male-sterile plants), or to develop GM crops with pollen that nonetheless does not contain the additional, genetically engineered material. …	1		Does Co - Extra improve the traceability of GMO food ?	The EU implemented regulations specifically governing co-existence and traceability. Traceability has become commonplace in the food and feed supply chains of most countries, but GMO traceability is more challenging given strict legal thresholds for unwanted mixing. Since 2001, conventional and organic food and feedstuffs can contain up to 0.9% of authorised modified material without carrying a G…	0		How can Co - Extra improve the DNA - based method used to test for contamination further ?	With regard to supporting cost-effective documentary traceability, Co-Extra was aimed at devising reliable, analytical detection methods, and at establishing the most appropriate methods of collecting, organising and distributing information. A core programme objective was the provision, to all stakeholders of food and feed chains, of a central decision-support system incorporating all necessary …	0		How could Co - Extra improve the DNA - based method of testing for contamination ?	â¢ Many casework samples contain impurities that can. co-purify with the DNA and affect PCR based. testing. â¢ A better understanding of what is causing PCR. inhibition and the basic mechanism(s) underlying. PCR is needed before strategies to overcome. inhibition are developed.	#N/A	0	18	TRUE	82_10_CAR_1dfebcaadf2e2abbb4a84b141755d0601a8edcf0	CAR_1dfebcaadf2e2abbb4a84b141755d0601a8edcf0	82_10_CAR_ad707e094a5475b5b0a35ab384901cb37e750c7d	CAR_ad707e094a5475b5b0a35ab384901cb37e750c7d	82_10_CAR_c3b5e081e8f27c9de016dc54037c8c2208f1bbd6	CAR_c3b5e081e8f27c9de016dc54037c8c2208f1bbd6		How could Co-Extra improve DNA-based testing for GMO contamination?	MARCO_6906655	82_10_MARCO_6906655	Whether or not a GMO is present in a sample can be tested by Q-PCR, but also by multiplex PCR. Multiplex PCR uses multiple, unique primer sets within a single PCR reaction to produce amplicons of varying sizes specific to different DNA sequences, i.e. different transgenes. By targeting multiple genes at once, additional information may be gained from a single test run that otherwise would require…	#N/A		#N/A	#N/A	#N/A
What are some interesting facts about bees?	83_1	What are some mind - blowing facts about bees ?	Fun facts about bees: 1 Honeybees are the only insect that produces food eaten by humans. 2 Worker honeybees are female. 3 The average worker bee produces only 1/12 teaspoon of honey over her lifetime. 4 A worker bee lives about 6 weeks. The queen bee can live to be 5 years old. 5 Honey never spoils.	3		What are some awesome facts about bees ?	Fun facts about bees: Honeybees are the only insect that produces food eaten by humans. Worker honeybees are female. The average worker bee produces only 1/12 teaspoon of honey over her lifetime. A worker bee lives about 6 weeks. The queen bee can live to be 5 years old. Honey never spoils. To make one pound of honey, bees must visit 2 million flowers.	3		What are unique facts about bees ?	Fun facts about bees: 1 Honeybees are the only insect that produces food eaten by humans. 2 Worker honeybees are female. 3 The average worker bee produces only 1/12 teaspoon of honey over her lifetime. 4 A worker bee lives about 6 weeks. The queen bee can live to be 5 years old. 5 Honey never spoils.	3		What are some interesting facts about bees ?	Fun facts about bees: Honeybees are the only insect that produces food eaten by humans. Worker honeybees are female. The average worker bee produces only 1/12 teaspoon of honey over her lifetime. A worker bee lives about 6 weeks. The queen bee can live to be 5 years old. Honey never spoils. To make one pound of honey, bees must visit 2 million flowers.	3		19	FALSE	83_1_MARCO_270579	MARCO_270579	83_1_MARCO_270580	MARCO_270580	83_1_MARCO_270579	MARCO_270579		What are some interesting facts about bees?	MARCO_270580	83_1_MARCO_270580	Fun facts about bees: Honeybees are the only insect that produces food eaten by humans. Worker honeybees are female. The average worker bee produces only 1/12 teaspoon of honey over her lifetime. A worker bee lives about 6 weeks. The queen bee can live to be 5 years old. Honey never spoils. To make one pound of honey, bees must visit 2 million flowers.	3		#N/A	#N/A	#N/A
What are some interesting facts about bees?	83_1	What are some mind - blowing facts about bees ?	Fun facts about bees: Honeybees are the only insect that produces food eaten by humans. Worker honeybees are female. The average worker bee produces only 1/12 teaspoon of honey over her lifetime. A worker bee lives about 6 weeks. The queen bee can live to be 5 years old. Honey never spoils. To make one pound of honey, bees must visit 2 million flowers.	3		What are some awesome facts about bees ?	Fun facts about bees: 1 Honeybees are the only insect that produces food eaten by humans. 2 Worker honeybees are female. 3 The average worker bee produces only 1/12 teaspoon of honey over her lifetime. 4 A worker bee lives about 6 weeks. The queen bee can live to be 5 years old. 5 Honey never spoils.	3		What are unique facts about bees ?	Fun facts about bees: Honeybees are the only insect that produces food eaten by humans. Worker honeybees are female. The average worker bee produces only 1/12 teaspoon of honey over her lifetime. A worker bee lives about 6 weeks. The queen bee can live to be 5 years old. Honey never spoils. To make one pound of honey, bees must visit 2 million flowers.	3		What are some interesting facts about bees ?	Fun facts about bees: 1 Honeybees are the only insect that produces food eaten by humans. 2 Worker honeybees are female. 3 The average worker bee produces only 1/12 teaspoon of honey over her lifetime. 4 A worker bee lives about 6 weeks. The queen bee can live to be 5 years old. 5 Honey never spoils.	3		19	FALSE	83_1_MARCO_270580	MARCO_270580	83_1_MARCO_270579	MARCO_270579	83_1_MARCO_270580	MARCO_270580		What are some interesting facts about bees?	MARCO_270579	83_1_MARCO_270579	Fun facts about bees: 1 Honeybees are the only insect that produces food eaten by humans. 2 Worker honeybees are female. 3 The average worker bee produces only 1/12 teaspoon of honey over her lifetime. 4 A worker bee lives about 6 weeks. The queen bee can live to be 5 years old. 5 Honey never spoils.	3		#N/A	#N/A	#N/A
What are some interesting facts about bees?	83_1	What are some mind - blowing facts about bees ?	Fun facts about bees: 1 Honeybees are the only insect that produces food eaten by humans. 2 Worker honeybees are female. 3 The average worker bee produces only 1/12 teaspoon of honey over her lifetime. 4 A worker bee lives about 6 weeks. 5 Honey never spoils. 6 To make one pound of honey, bees must visit 2 million flowers.	3		What are some awesome facts about bees ?	Fun facts about bees: 1 Honeybees are the only insect that produces food eaten by humans. 2 Worker honeybees are female. 3 The average worker bee produces only 1/12 teaspoon of honey over her lifetime. 4 A worker bee lives about 6 weeks. 5 Honey never spoils. 6 To make one pound of honey, bees must visit 2 million flowers.	3		What are unique facts about bees ?	Fun facts about bees: 1 Honeybees are the only insect that produces food eaten by humans. 2 Worker honeybees are female. 3 The average worker bee produces only 1/12 teaspoon of honey over her lifetime. 4 A worker bee lives about 6 weeks. 5 Honey never spoils. 6 To make one pound of honey, bees must visit 2 million flowers.	3		What are some interesting facts about bees ?	Fun facts about bees: 1 Honeybees are the only insect that produces food eaten by humans. 2 Worker honeybees are female. 3 The average worker bee produces only 1/12 teaspoon of honey over her lifetime. 4 A worker bee lives about 6 weeks. 5 Honey never spoils. 6 To make one pound of honey, bees must visit 2 million flowers.	3		19	FALSE	83_1_MARCO_270578	MARCO_270578	83_1_MARCO_270578	MARCO_270578	83_1_MARCO_270578	MARCO_270578		What are some interesting facts about bees?	MARCO_270578	83_1_MARCO_270578	Fun facts about bees: 1 Honeybees are the only insect that produces food eaten by humans. 2 Worker honeybees are female. 3 The average worker bee produces only 1/12 teaspoon of honey over her lifetime. 4 A worker bee lives about 6 weeks. 5 Honey never spoils. 6 To make one pound of honey, bees must visit 2 million flowers.	3		#N/A	#N/A	#N/A
Why doesn't honey spoil?	83_2	Why does honey from bees not rot ?	The nectar collected is what the worker bee uses to make honey. So the bee arrives at a flower, and proceeds to drink as much nectar as she can hold. She then passes the nectar to another worker bee (the nectar is held on her tongue) so the water in it can evaporate. This way it is highly concentrated, and never spoils. Seriously, the honey bee is brilliant!	3		Why does n't honey from bees spoil ?	The water content of honey is a key factor in why it doesnât spoil. At 17%, its water content is much lower than that of bacteria or fungi. Honey also has a low water activity; this is a measure of the amount of water in a substance that is available to support microbial growth.	3		Why does honey from bees not spoil ?	The water content of honey is a key factor in why it doesnât spoil. At 17%, its water content is much lower than that of bacteria or fungi. Honey also has a low water activity; this is a measure of the amount of water in a substance that is available to support microbial growth.	3		Why does n't honey from bees spoil ?	The water content of honey is a key factor in why it doesnât spoil. At 17%, its water content is much lower than that of bacteria or fungi. Honey also has a low water activity; this is a measure of the amount of water in a substance that is available to support microbial growth.	3		20	TRUE	83_2_MARCO_1954594	MARCO_1954594	83_2_MARCO_7679417	MARCO_7679417	83_2_MARCO_7679417	MARCO_7679417		Why doesn't honey spoil?	MARCO_7679417	83_2_MARCO_7679417	The water content of honey is a key factor in why it doesnât spoil. At 17%, its water content is much lower than that of bacteria or fungi. Honey also has a low water activity; this is a measure of the amount of water in a substance that is available to support microbial growth.	3		#N/A	#N/A	#N/A
Why doesn't honey spoil?	83_2	Why does honey from bees not rot ?	Honey is the complex substance made from nectar and sweet deposits from plants and trees which are gathered, modified and stored in the comb by honey bees. Honey is a biological mixture of inverted sugars, primarily glucose and fructose. It has antibacterial and anti fungal properties. Honey from the Western honey bee, along with the bee Tetragonisca angustula, has specific antibacterial activity…	3		Why does n't honey from bees spoil ?	The nectar collected is what the worker bee uses to make honey. So the bee arrives at a flower, and proceeds to drink as much nectar as she can hold. She then passes the nectar to another worker bee (the nectar is held on her tongue) so the water in it can evaporate. This way it is highly concentrated, and never spoils. Seriously, the honey bee is brilliant!	3		Why does honey from bees not spoil ?	The nectar collected is what the worker bee uses to make honey. So the bee arrives at a flower, and proceeds to drink as much nectar as she can hold. She then passes the nectar to another worker bee (the nectar is held on her tongue) so the water in it can evaporate. This way it is highly concentrated, and never spoils. Seriously, the honey bee is brilliant!	3		Why does n't honey from bees spoil ?	The nectar collected is what the worker bee uses to make honey. So the bee arrives at a flower, and proceeds to drink as much nectar as she can hold. She then passes the nectar to another worker bee (the nectar is held on her tongue) so the water in it can evaporate. This way it is highly concentrated, and never spoils. Seriously, the honey bee is brilliant!	3		20	TRUE	83_2_CAR_634361bc8e55a32455034e96ac59999a0213c5d1	CAR_634361bc8e55a32455034e96ac59999a0213c5d1	83_2_MARCO_1954594	MARCO_1954594	83_2_MARCO_1954594	MARCO_1954594		Why doesn't honey spoil?	MARCO_1954594	83_2_MARCO_1954594	Very few bacteria or microorganisms can survive in an environment like that, they just die. Theyâre smothered by it, essentially.â What Harris points out represents an important feature of honeyâs longevity: for honey to spoil, there needs to be something inside of it that can spoil. With such an inhospitable environment, organisms canât survive long enough within the jar of honey to have…	3		#N/A	#N/A	#N/A
Why doesn't honey spoil?	83_2	Why does honey from bees not rot ?	Leaving the hive, foraging bees collect sugar-rich flower nectar and return to the hive where they use their "honey stomachs" to ingest and regurgitate the nectar repeatedly until it is partially digested. Bee digestive enzymes - invertase, amylase, and diastase - and gastric acid hydrolyze sucrose to a mixture of glucose and fructose. The bees work together as a group with the regurgitation and …	2		Why does n't honey from bees spoil ?	Very few bacteria or microorganisms can survive in an environment like that, they just die. Theyâre smothered by it, essentially.â What Harris points out represents an important feature of honeyâs longevity: for honey to spoil, there needs to be something inside of it that can spoil. With such an inhospitable environment, organisms canât survive long enough within the jar of honey to have…	3		Why does honey from bees not spoil ?	Honey does not spoil because of the high sugar and low moisture content. Make sure the honey is actual bee honey and not corn syrup. The plastic tubs of jelly with the top peel may last 2 â 3 years. Plastic creamers and margarine cups expire quickly and must be refrigerated.	2		Why does n't honey from bees spoil ?	Very few bacteria or microorganisms can survive in an environment like that, they just die. Theyâre smothered by it, essentially.â What Harris points out represents an important feature of honeyâs longevity: for honey to spoil, there needs to be something inside of it that can spoil. With such an inhospitable environment, organisms canât survive long enough within the jar of honey to have…	3		20	TRUE	83_2_CAR_e5d7e34db4b630393a14f07a38a434e40f6fe96a	CAR_e5d7e34db4b630393a14f07a38a434e40f6fe96a	83_2_MARCO_6987560	MARCO_6987560	83_2_MARCO_5533423	MARCO_5533423		Why doesn't honey spoil?	MARCO_6987560	83_2_MARCO_6987560	Most microorganisms do not grow in honey, so sealed honey does not spoil, even after thousands of years. However, honey sometimes contains dormant endospores of the bacterium Clostridium botulinum, which can be dangerous to babies, as it may result in botulism.	3		#N/A	#N/A	#N/A
Why are so many bees dying?	83_3	Why are bees dying ?	Bees are dying at an alarming rate, and possibly because of manmade climate change; their demise might make growing the food we eat impossible. We have constructed a cultural life that forces the pressing questions of the environment and food supply outside of our field of view, and abdicated our own responsibilities to nature in favor of unsustainable, constant stimulation.	2		Why do bees die ?	Often the bee colony will die over the winter, usually due. to insufficient population to maintain adequate temperature for the bees to survive; insufficient. reserves of honey, so the colony starves to death over winter; or the colony succumbs to parasitic mites.	#N/A	1	Why are bees dying ?	Often the bee colony will die over the winter, usually due. to insufficient population to maintain adequate temperature for the bees to survive; insufficient. reserves of honey, so the colony starves to death over winter; or the colony succumbs to parasitic mites.	#N/A	1	Why are so many bees dying ?	Some researchers, beekeepers and journalists have argued that migratory beekeeping is one of the primary reasons that so many bees die each winter as well as an explanation for colony collapse disorder (CCD)âthe sudden and mysterious disappearance of an entire hive's residents, save for the queen and a few stragglers.	3		21	FALSE	83_3_MARCO_3867577	MARCO_3867577	83_3_MARCO_6680684	MARCO_6680684	83_3_MARCO_6680684	MARCO_6680684		Why are so many bees dying?	MARCO_4725320	83_3_MARCO_4725320	Some researchers, beekeepers and journalists have argued that migratory beekeeping is one of the primary reasons that so many bees die each winter as well as an explanation for colony collapse disorder (CCD)âthe sudden and mysterious disappearance of an entire hive's residents, save for the queen and a few stragglers.	3		#N/A	2	2
Why are so many bees dying?	83_3	Why are bees dying ?	Colony collapse disorder is not the only possible culprit for why bee populations are in flux. The big specter looming over the hives? Climate change. Which might explain why, in the last few months, the text string âbees are dying globally at an alarming rateâ is appearing more and more frequently on social media. One of the first recent tweets to use the global bee die-off as a punch line, …	2		Why do bees die ?	We return to our Just Ask feature, where experts tackle your questions on science and technology. Why do honeybees die when they sting? When a honeybee stings, it dies a gruesome death. The beeâs stinger is structured in such a way that once it punctures human skin, the bee canât yank it out without self-amputating.	#N/A	0	Why are bees dying ?	In the 1990s, beekeepers started recording major losses of worker honeybees during the winter months. Since then, there have been mass die offs in many of the other 4,000 species of bees. In 2006, the phenomenon was bestowed with the name colony collapse disorder. No one is exactly sure why the bees are dying off in unprecedented numbers, but some theories include the loss of flower meadows, varr…	3		Why are so many bees dying ?	Bees are dying at an alarming rate, and possibly because of manmade climate change; their demise might make growing the food we eat impossible. We have constructed a cultural life that forces the pressing questions of the environment and food supply outside of our field of view, and abdicated our own responsibilities to nature in favor of unsustainable, constant stimulation.	2		21	FALSE	83_3_MARCO_3867573	MARCO_3867573	83_3_MARCO_5959874	MARCO_5959874	83_3_MARCO_4812753	MARCO_4812753		Why are so many bees dying?	MARCO_3867577	83_3_MARCO_3867577	Bees are dying at an alarming rate, and possibly because of manmade climate change; their demise might make growing the food we eat impossible. We have constructed a cultural life that forces the pressing questions of the environment and food supply outside of our field of view, and abdicated our own responsibilities to nature in favor of unsustainable, constant stimulation.	2		#N/A	0	#N/A
Why are so many bees dying?	83_3	Why are bees dying ?	In the 1990s, beekeepers started recording major losses of worker honeybees during the winter months. Since then, there have been mass die offs in many of the other 4,000 species of bees. In 2006, the phenomenon was bestowed with the name colony collapse disorder. No one is exactly sure why the bees are dying off in unprecedented numbers, but some theories include the loss of flower meadows, varr…	3		Why do bees die ?	1 Killer bees have been known to chase people for over a 1/4 mile once they get excited and aggressive. Certain species of bees die after stinging because their stingers, which are attached to their abdomen, have little barbs or hooks on them. When this type of bee tries to fly away after stinging something, part of the abdomen is ripped away.	0		Why are bees dying ?	Colony collapse disorder is not the only possible culprit for why bee populations are in flux. The big specter looming over the hives? Climate change. Which might explain why, in the last few months, the text string âbees are dying globally at an alarming rateâ is appearing more and more frequently on social media. One of the first recent tweets to use the global bee die-off as a punch line, …	2		Why are so many bees dying ?	In the 1990s, beekeepers started recording major losses of worker honeybees during the winter months. Since then, there have been mass die offs in many of the other 4,000 species of bees. In 2006, the phenomenon was bestowed with the name colony collapse disorder. No one is exactly sure why the bees are dying off in unprecedented numbers, but some theories include the loss of flower meadows, varr…	3		21	FALSE	83_3_MARCO_4812753	MARCO_4812753	83_3_MARCO_6551913	MARCO_6551913	83_3_MARCO_3867573	MARCO_3867573		Why are so many bees dying?	MARCO_4812753	83_3_MARCO_4812753	In the 1990s, beekeepers started recording major losses of worker honeybees during the winter months. Since then, there have been mass die offs in many of the other 4,000 species of bees. In 2006, the phenomenon was bestowed with the name colony collapse disorder. No one is exactly sure why the bees are dying off in unprecedented numbers, but some theories include the loss of flower meadows, varr…	3		#N/A	#N/A	#N/A
What can be done to stop bees from dying?	83_4	How do I prevent bees from dying ?	1 Ensure all used beekeeping tools and supplies are free from residues of pollen, wax, propolis, honey and comb. 2 If it cannot be properly cleaned, then do not use it. 3 Do not use out-of-date, second hand medications, feeds or other substances in your bee hive or on your bees.	#N/A	1	How can I save bees from dying ?	Lisa attempts to convince the town to save the bee population, but despite her logical protest that they always get into trouble when they ignore her advice, she fails when Burns informs everyone about the amazing features of his arena and threatens to trade the Excitement's recent draft pick and fan favorite, Alaskan native and Eskimo Muk Mu. Lisa becomes depressed that the bee population is slo…	1		What should be done to stop bees from dying ?	Lisa attempts to convince the town to save the bee population, but despite her logical protest that they always get into trouble when they ignore her advice, she fails when Burns informs everyone about the amazing features of his arena and threatens to trade the Excitement's recent draft pick and fan favorite, Alaskan native and Eskimo Muk Mu. Lisa becomes depressed that the bee population is slo…	1		What can be done to stop bees from spoiling ?	Deterring Bees from Approaching an Area. 1 1. Drive bees away with smoke. Bees will flee from smoke, or become dazed and less aggressive if they inhale too much. 2 2. Use mothballs. Mothballs contain a powerful pesticide that can drive away or kill many insects, including bees. 3 3. Use bitter almond oil.	0		22	TRUE	83_4_MARCO_1005763	MARCO_1005763	83_4_CAR_2f9c2ad39769d1fcf36cd73a6e27aea2cf1c8632	CAR_2f9c2ad39769d1fcf36cd73a6e27aea2cf1c8632	83_4_CAR_2f9c2ad39769d1fcf36cd73a6e27aea2cf1c8632	CAR_2f9c2ad39769d1fcf36cd73a6e27aea2cf1c8632		What can be done to stop bees from dying?	MARCO_6497563	83_4_MARCO_6497563	Deterring Bees from Approaching an Area. 1 1. Drive bees away with smoke. Bees will flee from smoke, or become dazed and less aggressive if they inhale too much. 2 2. Use mothballs. Mothballs contain a powerful pesticide that can drive away or kill many insects, including bees. 3 3. Use bitter almond oil.	0		1	#N/A	#N/A							1
What can be done to stop bees from dying?	83_4	How do I prevent bees from dying ?	According to Virgil in the fourth Georgic, at one time the bees of Aristaeus, son of Apollo, all died of a disease. Aristaeus went to his mother, Cyrene, for help; she told him that Proteus could tell him how to prevent another such disaster, but would do so only if compelled. Aristaeus had to seize Proteus and hold him, no matter what he would change into. Aristaeus did so, and Proteus eventuall…	#N/A	0	How can I save bees from dying ?	I hope youâll consider trying one or more of these bee-friendly steps, in order from least to most commitment: 1 Leave weeds like dandelions and clover in your yard as a tasty snack for local bees. 2 Keep pesticides out of your garden and yard, as these chemicals can harm the hives. 3 Plant a bee garden! 4 Host a beehive.	#N/A	2	What should be done to stop bees from dying ?	The bees need you. Honeybee colonies are dying at frightening rates. Since 2007, an average of 30% of all colonies have died every winter in the United States. This loss is about twice as high as what U.S. beekeepers consider economically tolerable.In the winter of 2012-13, 29% of all colonies died in Canada and 20% died in Europe.mpact Your World: What you can do to help save bees. Honeybees and…	1		What can be done to stop bees from spoiling ?	With practice,the quick shake can be a very efficient way todislodge the bees from their comb.If a brush is used, it should be clean and usedonly for the purpose of brushing bees off honey-combs. This ensures that it does not contaminateyour honey with other substances.lso, leaving the hive open toolong may cause stress to the brood and encouragerobbing by other bees. Robbing will mean an endto h…	#N/A	0	22	TRUE	83_4_CAR_863216788b059af43536acdb7f1f45eb84d724c5	CAR_863216788b059af43536acdb7f1f45eb84d724c5	83_4_MARCO_1865511	MARCO_1865511	83_4_MARCO_1881748	MARCO_1881748		What can be done to stop bees from dying?	MARCO_706480	83_4_MARCO_706480	Apart from colony collapse disorder, losses outside the US have been attributed to causes including pesticide seed dressings, such as Clothianidin, Imidacloprid and Thiamethoxam. From 2013 the European Union restricted some pesticides to stop bee populations from declining further. In 2014 the Intergovernmental Panel on Climate Change report warned that bees faced increased risk of extinction bec…	#N/A		0	0	#N/A							0
What can be done to stop bees from dying?	83_4	How do I prevent bees from dying ?	Step 5 Pick your flowers. To prevent bees from buzzing near your house, reduce the amount of flowering plants you keep on your porch or in other areas of your yard that are near doors and windows. Quick Tip: Some people say that hanging mothballs in pantyhose in your yard will repel bees.	#N/A	0	How can I save bees from dying ?	As a concerned consumer, thereâs lots more you can do to help the bees, Deb. 1 I hope youâll consider trying one or more of these bee-friendly steps, in order from least to most commitment: 2 Leave weeds like dandelions and clover in your yard as a tasty snack for local bees.	2		What should be done to stop bees from dying ?	Coloradans try to protect honey bees from dying of mysterious sickness. Honeybees: They are dying and US and Europe taking different paths to find out ... America is one bad winter away from a food disaster, thanks to dying bees. Honey Bees Dying Along Central Coast.	1		What can be done to stop bees from spoiling ?	The use of feeders by the bees stops when it either gets too cold or the bees collect other food sources. To avoid contaminating honey with sugar syrup, bees should not be fed syrup when the honey supers are on.	0		22	TRUE	83_4_MARCO_3481678	MARCO_3481678	83_4_MARCO_1865506	MARCO_1865506	83_4_MARCO_4605696	MARCO_4605696		What can be done to stop bees from dying?	CAR_c28ecab49494b5167896055c22cf9a15771a3eae	83_4_CAR_c28ecab49494b5167896055c22cf9a15771a3eae	The bees need you. Honeybee colonies are dying at frightening rates. Since 2007, an average of 30% of all colonies have died every winter in the United States. This loss is about twice as high as what U.S. beekeepers consider economically tolerable.In the winter of 2012-13, 29% of all colonies died in Canada and 20% died in Europe.mpact Your World: What you can do to help save bees. Honeybees and…	0		0	#N/A	#N/A							0
What has happened to bee habitat?	83_5	What exactly happened to bees ' habitat ?	Due to recent decades of agricultural intensification in Europe, the natural habitat of B. muscorum has been largely diminished. Many of the permanent flower-rich areas where the bee commonly forages have been destroyed by increased commercial farming. B. muscorum has poor dispersal ability compared to other species of bumblebee, making it more vulnerable to habitat loss. As a result, populations…	3		What really happened to bees ' habitat ?	Bees and other pollinators face a higher risk of extinction due to loss of habitat and access to natural food sources. The global dependency on livestock and agriculture has rendered no less than 50% of the earths landmass uninhabitable for bees. The agricultural practice of planting one crop (monoculture) in a given area year after year leads to extreme malnourishment. Regardless if the planted …	3		How and why did bees ' habitat evolve ?	Centris pallida is a species of solitary bee native to North America. It lacks an accepted common name; however, it has been called the digger bee, the desert bee, and the pallid bee due to its actions, habitat, and color respectively. The solitary nature of this bee allows for a dual-strategy mating system which produces an evolutionarily stable state resistant to invading strategies. These bees…	0		What has happened to bees ' habitat ?	Due to recent decades of agricultural intensification in Europe, the natural habitat of B. muscorum has been largely diminished. Many of the permanent flower-rich areas where the bee commonly forages have been destroyed by increased commercial farming. B. muscorum has poor dispersal ability compared to other species of bumblebee, making it more vulnerable to habitat loss. As a result, populations…	3		23	FALSE	83_5_CAR_a3db5350b07c68a4f6d7d043c29078e716b3095e	CAR_a3db5350b07c68a4f6d7d043c29078e716b3095e	83_5_CAR_d256bd4b2070f4b09ff1de021d6679070df6b2e3	CAR_d256bd4b2070f4b09ff1de021d6679070df6b2e3	83_5_CAR_98dc05a0c4b31c10f60eacd7420707d1a965bb51	CAR_98dc05a0c4b31c10f60eacd7420707d1a965bb51		What has happened to bee habitat?	CAR_a3db5350b07c68a4f6d7d043c29078e716b3095e	83_5_CAR_a3db5350b07c68a4f6d7d043c29078e716b3095e	Due to recent decades of agricultural intensification in Europe, the natural habitat of B. muscorum has been largely diminished. Many of the permanent flower-rich areas where the bee commonly forages have been destroyed by increased commercial farming. B. muscorum has poor dispersal ability compared to other species of bumblebee, making it more vulnerable to habitat loss. As a result, populations…	3		#N/A	#N/A	#N/A
What has happened to bee habitat?	83_5	What exactly happened to bees ' habitat ?	The largest threat facing B. frigidus is climate change, as these bees inhabit a specialized climate. As temperature rises, the bees may be driven either farther north or to extinction. With increasing temperatures, snow does not pack as tightly. This leads to earlier melting, and during the summer, water isn’t as readily available. This causes the habitat to dry out and fewer plants bloom, thus …	3		What really happened to bees ' habitat ?	The largest threat facing B. frigidus is climate change, as these bees inhabit a specialized climate. As temperature rises, the bees may be driven either farther north or to extinction. With increasing temperatures, snow does not pack as tightly. This leads to earlier melting, and during the summer, water isn’t as readily available. This causes the habitat to dry out and fewer plants bloom, thus …	3		How and why did bees ' habitat evolve ?	When resource density is low in Africanized honey bee habitats, it is necessary for the bees to harvest a greater variety of resources because they cannot afford to be selective. Honey bees that are genetically inclined towards resources high in sucrose like concentrated nectar will not be able to sustain themselves in harsher environments. The noted PER to low sucrose concentration in Africanize…	1		What has happened to bees ' habitat ?	The main threat to the species is habitat loss. Damage to the habitat has occurred via development, the introduction of nonnative plants and animals, agriculture, recreational activity, and fire. Natural disasters such as hurricanes are also a threat to the habitat. This and other rare Hylaeus bee species were once "widespread" in Hawaii.	4		23	FALSE	83_5_CAR_0bae4b6568c48f3334c3eb5721680c2b6d9f286d	CAR_0bae4b6568c48f3334c3eb5721680c2b6d9f286d	83_5_CAR_0bae4b6568c48f3334c3eb5721680c2b6d9f286d	CAR_0bae4b6568c48f3334c3eb5721680c2b6d9f286d	83_5_CAR_13c5d9dd42284ad9368af9f22abbc50ca19a6550	CAR_13c5d9dd42284ad9368af9f22abbc50ca19a6550		What has happened to bee habitat?	CAR_43786a3f70ef26040df62cdb45b14e7f49a2e1a2	83_5_CAR_43786a3f70ef26040df62cdb45b14e7f49a2e1a2	The main threat to the species is habitat loss. Damage to the habitat has occurred via development, the introduction of nonnative plants and animals, agriculture, recreational activity, and fire. Natural disasters such as hurricanes are also a threat to the habitat. This and other rare Hylaeus bee species were once "widespread" in Hawaii.	4		#N/A	#N/A	#N/A
What has happened to bee habitat?	83_5	What exactly happened to bees ' habitat ?	The main threat to the species is habitat loss. Damage to the habitat has occurred via development, the introduction of nonnative plants and animals, agriculture, recreational activity, and fire. Natural disasters such as hurricanes are also a threat to the habitat. This and other rare Hylaeus bee species were once "widespread" in Hawaii.	4		What really happened to bees ' habitat ?	The main threat to the species is habitat loss. Damage to the habitat has occurred via development, the introduction of nonnative plants and animals, agriculture, recreational activity, and fire. Natural disasters such as hurricanes are also a threat to the habitat. This and other rare Hylaeus bee species were once "widespread" in Hawaii.	4		How and why did bees ' habitat evolve ?	Habitat of a Honey Bee. Researchers believe that the original habitats of the honey bee are tropical climates and heavily forested areas. Honey bees can thrive in natural or domesticated environments, though they prefer to live in gardens, woodlands, orchards, meadows and other areas where flowering plants are abundant.	1		What has happened to bees ' habitat ?	The species has been classified as Endangered on the IUCN Red List. The bee is already rare with geographically separated populations, and available high-mountain habitat is shrinking due to climate change. Its parasitic lifestyle also makes it susceptible to indirect damage from population reductions in its host species.	3		23	FALSE	83_5_CAR_43786a3f70ef26040df62cdb45b14e7f49a2e1a2	CAR_43786a3f70ef26040df62cdb45b14e7f49a2e1a2	83_5_CAR_43786a3f70ef26040df62cdb45b14e7f49a2e1a2	CAR_43786a3f70ef26040df62cdb45b14e7f49a2e1a2	83_5_MARCO_574203	MARCO_574203		What has happened to bee habitat?	CAR_7ec535679932fa0dbc92cf07cdcf5dd9295c7122	83_5_CAR_7ec535679932fa0dbc92cf07cdcf5dd9295c7122	The species has been classified as Endangered on the IUCN Red List. The bee is already rare with geographically separated populations, and available high-mountain habitat is shrinking due to climate change. Its parasitic lifestyle also makes it susceptible to indirect damage from population reductions in its host species.	3		#N/A	#N/A	#N/A
What can I do to help provide a habitat for bees?	83_6	How can we protect bees ' habitats ?	The best way to do this is to provide a diversity of flowers blooming over a long season that are attractive to bees and that are protected from pesticide spray and drift. In the words of Dr. Marla Spivak, MacArthur âGeniusâ award winner: There are two things each and every one of us can do to help bee populations.	2		What can I do to provide a habitat for bees ?	Plant a Bee Garden â Create an oasis for bees and other pollinators. More and more gardeners are anxious to do their part to help the bees by adding to the shrinking inventory of flower-rich habitat in their area. You can create a âbee gardenâ. In return, the bees will pollinate your flowers, providing a bountiful harvest of fruits, seeds and vegetables as well as the joy of watching them u…	3		What can I do to help solve the bees ' problem of not storing honey ?	As a concerned consumer, thereâs lots more you can do to help the bees, Deb. 1 I hope youâll consider trying one or more of these bee-friendly steps, in order from least to most commitment: 2 Leave weeds like dandelions and clover in your yard as a tasty snack for local bees.	2		What can I do to help with the bee problem ?	As a concerned consumer, thereâs lots more you can do to help the bees, Deb. 1 I hope youâll consider trying one or more of these bee-friendly steps, in order from least to most commitment: 2 Leave weeds like dandelions and clover in your yard as a tasty snack for local bees.	2		24	TRUE	83_6_MARCO_7672257	MARCO_7672257	83_6_MARCO_5268578	MARCO_5268578	83_6_MARCO_1865506	MARCO_1865506		What can I do to help provide a habitat for bees?	MARCO_1865506	83_6_MARCO_1865506	Plant a Bee Garden â Create an oasis for bees and other pollinators. More and more gardeners are anxious to do their part to help the bees by adding to the shrinking inventory of flower-rich habitat in their area. You can create a âbee gardenâ. In return, the bees will pollinate your flowers, providing a bountiful harvest of fruits, seeds and vegetables as well as the joy of watching them u…	2		#N/A	#N/A	#N/A
What can I do to help provide a habitat for bees?	83_6	How can we protect bees ' habitats ?	Plant a Bee Garden â Create an oasis for bees and other pollinators. More and more gardeners are anxious to do their part to help the bees by adding to the shrinking inventory of flower-rich habitat in their area. You can create a âbee gardenâ. In return, the bees will pollinate your flowers, providing a bountiful harvest of fruits, seeds and vegetables as well as the joy of watching them u…	3		What can I do to provide a habitat for bees ?	Bees need flowers for sustenance, and flowers need bees for pollination. But it's important the flowers you grow provide the food bees need. You can also help your garden wildlife by creating dead wood habitats, or with our top four jobs for wildlife in autumn. Great flowers start with pollination, and for that you need bees.	2		What can I do to help solve the bees ' problem of not storing honey ?	Plant a Bee Garden â Create an oasis for bees and other pollinators. More and more gardeners are anxious to do their part to help the bees by adding to the shrinking inventory of flower-rich habitat in their area. You can create a âbee gardenâ. In return, the bees will pollinate your flowers, providing a bountiful harvest of fruits, seeds and vegetables as well as the joy of watching them u…	3		What can I do to help with the bee problem ?	The best way to do this is to provide a diversity of flowers blooming over a long season that are attractive to bees and that are protected from pesticide spray and drift. In the words of Dr. Marla Spivak, MacArthur âGeniusâ award winner: There are two things each and every one of us can do to help bee populations.	2		24	TRUE	83_6_MARCO_5268578	MARCO_5268578	83_6_MARCO_5536336	MARCO_5536336	83_6_MARCO_5268578	MARCO_5268578		What can I do to help provide a habitat for bees?	MARCO_7672257	83_6_MARCO_7672257	Bees need flowers for sustenance, and flowers need bees for pollination. But it's important the flowers you grow provide the food bees need. You can also help your garden wildlife by creating dead wood habitats, or with our top four jobs for wildlife in autumn. Great flowers start with pollination, and for that you need bees.	2		#N/A	#N/A	#N/A
What can I do to help provide a habitat for bees?	83_6	How can we protect bees ' habitats ?	Recently, the European Union has introduced agri-environment plans that can be used to pay farmers to manage their land in a way that benefits bee species. Britain adopted the Environmental Stewardship scheme with the goal of enhancing the supply of pollen and nectar sources for bumblebees. These plans hope to counteract some of the issues that commercial developments have caused. For example, in…	0		What can I do to provide a habitat for bees ?	The best way to do this is to provide a diversity of flowers blooming over a long season that are attractive to bees and that are protected from pesticide spray and drift. In the words of Dr. Marla Spivak, MacArthur âGeniusâ award winner: There are two things each and every one of us can do to help bee populations.	2		What can I do to help solve the bees ' problem of not storing honey ?	After the bees have started to work filling the first super with honey add a second super just above the brood nest and place the partially filled first super above it. After which I place a third empty super on top. This third one I use as a safety valve so to speak, just in case I canât get back when I should. It provides additional room for honey storage. When I do return in a week to ten da…	#N/A	0	What can I do to help with the bee problem ?	Plant a Bee Garden â Create an oasis for bees and other pollinators. More and more gardeners are anxious to do their part to help the bees by adding to the shrinking inventory of flower-rich habitat in their area. You can create a âbee gardenâ. In return, the bees will pollinate your flowers, providing a bountiful harvest of fruits, seeds and vegetables as well as the joy of watching them u…	3		24	TRUE	83_6_CAR_2344e7f5ce86b1675be1d9197bef32cbdef5682e	CAR_2344e7f5ce86b1675be1d9197bef32cbdef5682e	83_6_MARCO_7672257	MARCO_7672257	83_6_MARCO_4092650	MARCO_4092650		What can I do to help provide a habitat for bees?	MARCO_5268578	83_6_MARCO_5268578	The best way to do this is to provide a diversity of flowers blooming over a long season that are attractive to bees and that are protected from pesticide spray and drift. In the words of Dr. Marla Spivak, MacArthur âGeniusâ award winner: There are two things each and every one of us can do to help bee populations.	3		#N/A	#N/A	#N/A
What is the cause of colony collapse disorder?	83_7	How do we know what causes CCD in bees ?	A 2012 in situ study provided strong evidence that exposure to sublethal levels of imidacloprid in high fructose corn syrup (HFCS) used to feed honey bees when forage is not available causes bees to exhibit symptoms consistent to CCD 23 weeks after imidacloprid dosing. The researchers suggested, "the observed delayed mortality in honey bees caused by imidacloprid in HFCS is a novel and plausible …	3		What causes CCD in bees ?	The mechanisms of CCD are still unknown, but many causes are currently being considered, such as pesticides, mites, fungi, beekeeping practices (such as the use of antibiotics or long-distance transportation of beehives), malnutrition, poor quality queens, starvation, other pathogens, and immunodeficiencies. The current scientific consensus is that no single factor is causing CCD, but that some o…	4		Why do bees get CCD ? I am relatively new to beekeeping .	The mechanisms of CCD are still unknown, but many causes are currently being considered, such as pesticides, mites, fungi, beekeeping practices (such as the use of antibiotics or long-distance transportation of beehives), malnutrition, poor quality queens, starvation, other pathogens, and immunodeficiencies. The current scientific consensus is that no single factor is causing CCD, but that some o…	4		What is the cause of CCD in bees ?	The mechanisms of CCD are still unknown, but many causes are currently being considered, such as pesticides, mites, fungi, beekeeping practices (such as the use of antibiotics or long-distance transportation of beehives), malnutrition, poor quality queens, starvation, other pathogens, and immunodeficiencies. The current scientific consensus is that no single factor is causing CCD, but that some o…	4		25	FALSE	83_7_CAR_0925f066e12d49abe7172781330c6e634102379b	CAR_0925f066e12d49abe7172781330c6e634102379b	83_7_CAR_d863917fe3f0ec32582244ca5ce181f30cb00429	CAR_d863917fe3f0ec32582244ca5ce181f30cb00429	83_7_CAR_d863917fe3f0ec32582244ca5ce181f30cb00429	CAR_d863917fe3f0ec32582244ca5ce181f30cb00429		What is the cause of colony collapse disorder?	CAR_d863917fe3f0ec32582244ca5ce181f30cb00429	83_7_CAR_d863917fe3f0ec32582244ca5ce181f30cb00429	Colony collapse disorder (CCD) is a syndrome that is characterized by the sudden loss of adult bees from the hive. Many possible explanations for CCD have been proposed, but no one primary cause has been found. The US Department of Agriculture (USDA) has indicated in a report to Congress that a combination of factors may be causing CCD, including pesticides, pathogens, and parasites, all of which…	4		#N/A	#N/A	#N/A
What is the cause of colony collapse disorder?	83_7	How do we know what causes CCD in bees ?	In July 2007, the United States Department of Agriculture (USDA) released its "CCD Action Plan", which outlined a strategy for addressing CCD consisting of four main components: survey and data collection; analysis of samples; hypothesis-driven research; mitigation and preventive action. The first annual report of the U.S. Colony Collapse Disorder Steering Committee was published in 2009. It sugg…	2		What causes CCD in bees ?	A 2012 in situ study provided strong evidence that exposure to sublethal levels of imidacloprid in high fructose corn syrup (HFCS) used to feed honey bees when forage is not available causes bees to exhibit symptoms consistent to CCD 23 weeks after imidacloprid dosing. The researchers suggested, "the observed delayed mortality in honey bees caused by imidacloprid in HFCS is a novel and plausible …	3		Why do bees get CCD ? I am relatively new to beekeeping .	A 2011 Congressional Research Report describing some of the reasons why scientists believe honey bee colonies are being affected by CCD reported that the United States Department of Agriculture had concluded in 2009, "it now seems clear that no single factor alone is responsible for the malady." According to the research report, the neonicotinoids, which contain the active ingredient imidacloprid…	2		What is the cause of CCD in bees ?	A 2012 in situ study provided strong evidence that exposure to sublethal levels of imidacloprid in high fructose corn syrup (HFCS) used to feed honey bees when forage is not available causes bees to exhibit symptoms consistent to CCD 23 weeks after imidacloprid dosing. The researchers suggested, "the observed delayed mortality in honey bees caused by imidacloprid in HFCS is a novel and plausible …	3		25	FALSE	83_7_CAR_fffab339e95e447c4d3104ec351aacc6a8b43121	CAR_fffab339e95e447c4d3104ec351aacc6a8b43121	83_7_CAR_0925f066e12d49abe7172781330c6e634102379b	CAR_0925f066e12d49abe7172781330c6e634102379b	83_7_CAR_6b6cdb836b4bb98b6420ca01889b482e0b885cbb	CAR_6b6cdb836b4bb98b6420ca01889b482e0b885cbb		What is the cause of colony collapse disorder?	CAR_0925f066e12d49abe7172781330c6e634102379b	83_7_CAR_0925f066e12d49abe7172781330c6e634102379b	In July 2007, the United States Department of Agriculture (USDA) released its "CCD Action Plan", which outlined a strategy for addressing CCD consisting of four main components: survey and data collection; analysis of samples; hypothesis-driven research; mitigation and preventive action. The first annual report of the U.S. Colony Collapse Disorder Steering Committee was published in 2009. It sugg…	3		#N/A	#N/A	#N/A
What is the cause of colony collapse disorder?	83_7	How do we know what causes CCD in bees ?	Research in 2009 has found that an indicator for an impaired protein production is common among all bees affected by CCD, a pattern consistent with IAPV infection. It is conjectured that Dicistroviridae, like the IAPV, cause degradation of the ribosomes, which are responsible for protein production of cells, and that this reduced ribosomal function weakens the bees, making them more vulnerable to…	2		What causes CCD in bees ?	Several possible causes for CCD have been proposed, but no single proposal has gained widespread acceptance among the scientific community. Suggested causes include: infections with Varroa and Acarapis mites; malnutrition; various pathogens; genetic factors; immunodeficiencies; loss of habitat; changing beekeeping practices; or a combination of factors. A large amount of speculation has surrounde…	4		Why do bees get CCD ? I am relatively new to beekeeping .	Evaluating pesticide contributions to CCD is particularly difficult for several reasons. First, the variety of pesticides in use in the different areas reporting CCD makes it difficult to test for all possible pesticides simultaneously. Second, many commercial beekeeping operations are mobile, transporting hives over large geographic distances over the course of a season, potentially exposing the…	#N/A	1	What is the cause of CCD in bees ?	Several possible causes for CCD have been proposed, but no single proposal has gained widespread acceptance among the scientific community. Suggested causes include: infections with Varroa and Acarapis mites; malnutrition; various pathogens; genetic factors; immunodeficiencies; loss of habitat; changing beekeeping practices; or a combination of factors. A large amount of speculation has surrounde…	4		25	FALSE	83_7_CAR_fb6ad62c8f83d22008bf3d23f7050afc7cda4949	CAR_fb6ad62c8f83d22008bf3d23f7050afc7cda4949	83_7_CAR_34d35ea59b6fdd5bdefece429f6411eba3799921	CAR_34d35ea59b6fdd5bdefece429f6411eba3799921	83_7_CAR_6257a0e53a5e27425e872bed87fe890a0bae742e	CAR_6257a0e53a5e27425e872bed87fe890a0bae742e		What is the cause of colony collapse disorder?	CAR_34d35ea59b6fdd5bdefece429f6411eba3799921	83_7_CAR_34d35ea59b6fdd5bdefece429f6411eba3799921	Pesticides are linked to Colony Collapse Disorder and are now considered a main cause, and the toxic effects of Neonicotinoids on bees are confirmed. Currently, many studies are being conducted to further understand the toxic effects of pesticides on bees. Agencies such as the EPA and EFSA are making action plans to protect bee health in response to calls from scientists and the public to ban or …	4		#N/A	#N/A	#N/A
What would happen if the bees died out?	83_8	What would happen if the bees suddenly died out ?	What would happen if you were hit by a penny falling from a skyscraper? What happens if you don't sleep for 24 hours? You're basically drunk. So could all bees go extinct? It's unlikely, Bolt noted, as there are 4,000 known species of bees in North America alone and about 20,000 species worldwide. But if all bees did disappear, we'd all be in a world of trouble, he said. The variety of foods woul…	3		What will happen if bees die ?	Rated in Aikido. Bees help pollinate around 70% of all the crops on the planet. If all the bees die and nothing rises to replace them (another type of insect, for example, or serious human intervention), many plants will simply die-off due to lack of pollination.If 70% of the plants on the planet die.Without bees, there would be no honey, but distinctively, certain plants would not be able to rep…	3		What would happen if the honey bees died ?	Burt's Bees, a company which uses honey is most of its products, would increase prices until having to stop production of their products. Honey used in facials would disappear, and many LUSH products that are made with honey would also disappear. In short, bees are super duper important. Bees are dropping like flies and people need to understand the severity of the problem. If bees die, so do we.…	2		What would happen if the bees died out ?	Bees help pollinate around 70% of all the crops on the planet. If all the bees die and nothing rises to replace them (another type of insect, for example, or serious human intervention), many plants will simply die-off due to lack of pollination. If 70% of the plants on the planet die. Without bees, there would be no honey, but distinctively, certain plants would not be able to reproduce and woul…	3		26	TRUE	83_8_MARCO_2141004	MARCO_2141004	83_8_MARCO_1881743	MARCO_1881743	83_8_MARCO_2140999	MARCO_2140999		What would happen if the bees died out?	MARCO_2141003	83_8_MARCO_2141003	Bees help pollinate around 70% of all the crops on the planet. If all the bees die and nothing rises to replace them (another type of insect, for example, or serious human intervention), many plants will simply die-off due to lack of pollination. If 70% of the plants on the planet die. Without bees, there would be no honey, but distinctively, certain plants would not be able to reproduce and woul…	3		#N/A	#N/A	#N/A
What would happen if the bees died out?	83_8	What would happen if the bees suddenly died out ?	If a queen suddenly dies, the workers will flood with royal jelly several cells where a larva has just emerged. The young larva floats on the royal jelly; the worker bees then build a larger queen cell from the normal-sized worker cell, which protrudes vertically from the face of the brood comb. Emergency queens are usually smaller and less prolific.	#N/A	0	What will happen if bees die ?	Bees help pollinate around 70% of all the crops on the planet. If all the bees die and nothing rises to replace them (another type of insect, for example, or serious human intervention), many plants will simply die-off due to lack of pollination. If 70% of the plants on the planet die. Without bees, there would be no honey, but distinctively, certain plants would not be able to reproduce and woul…	3		What would happen if the honey bees died ?	Bees help pollinate around 70% of all the crops on the planet. If all the bees die and nothing rises to replace them (another type of insect, for example, or serious human intervention), many plants will simply die-off due to lack of pollination. If 70% of the plants on the planet die. Without bees, there would be no honey, but distinctively, certain plants would not be able to reproduce and woul…	3		What would happen if the bees died out ?	What would happen if you were hit by a penny falling from a skyscraper? What happens if you don't sleep for 24 hours? You're basically drunk. So could all bees go extinct? It's unlikely, Bolt noted, as there are 4,000 known species of bees in North America alone and about 20,000 species worldwide. But if all bees did disappear, we'd all be in a world of trouble, he said. The variety of foods woul…	3		26	TRUE	83_8_CAR_fd9b429abd52459f6cd78763a485cee9f6e8b1a4	CAR_fd9b429abd52459f6cd78763a485cee9f6e8b1a4	83_8_MARCO_2141003	MARCO_2141003	83_8_MARCO_2141003	MARCO_2141003		What would happen if the bees died out?	MARCO_2141004	83_8_MARCO_2141004	From 1945 to 2005, bee colonies have decreased from around 6,000,000 colonies to less than 3,000,000 colonies. Bees pollinate around 70% of the world's crops, and on average, about one in every three bites of food humans consume has been pollinated by a bee. If the bees were to die out, pollination rates would plummet, likely resulting in less food and skyrocketing market prices.	3		0	#N/A	#N/A							0
What would happen if the bees died out?	83_8	What would happen if the bees suddenly died out ?	From 1945 to 2005, bee colonies have decreased from around 6,000,000 colonies to less than 3,000,000 colonies. Bees pollinate around 70% of the world's crops, and on average, about one in every three bites of food humans consume has been pollinated by a bee. If the bees were to die out, pollination rates would plummet, likely resulting in less food and skyrocketing market prices.	3		What will happen if bees die ?	Burt's Bees, a company which uses honey is most of its products, would increase prices until having to stop production of their products. Honey used in facials would disappear, and many LUSH products that are made with honey would also disappear. In short, bees are super duper important. Bees are dropping like flies and people need to understand the severity of the problem. If bees die, so do we.…	2		What would happen if the honey bees died ?	Rated in Aikido. Bees help pollinate around 70% of all the crops on the planet. If all the bees die and nothing rises to replace them (another type of insect, for example, or serious human intervention), many plants will simply die-off due to lack of pollination.If 70% of the plants on the planet die.Without bees, there would be no honey, but distinctively, certain plants would not be able to rep…	3		What would happen if the bees died out ?	From 1945 to 2005, bee colonies have decreased from around 6,000,000 colonies to less than 3,000,000 colonies. Bees pollinate around 70% of the world's crops, and on average, about one in every three bites of food humans consume has been pollinated by a bee. If the bees were to die out, pollination rates would plummet, likely resulting in less food and skyrocketing market prices.	3		26	TRUE	83_8_CAR_652e1c4654a2cce7d24d500297543a91095bb6f2	CAR_652e1c4654a2cce7d24d500297543a91095bb6f2	83_8_MARCO_2140999	MARCO_2140999	83_8_MARCO_1881743	MARCO_1881743		What would happen if the bees died out?	CAR_652e1c4654a2cce7d24d500297543a91095bb6f2	83_8_CAR_652e1c4654a2cce7d24d500297543a91095bb6f2	Rated in Aikido. Bees help pollinate around 70% of all the crops on the planet. If all the bees die and nothing rises to replace them (another type of insect, for example, or serious human intervention), many plants will simply die-off due to lack of pollination.If 70% of the plants on the planet die.Without bees, there would be no honey, but distinctively, certain plants would not be able to rep…	3		#N/A	#N/A	#N/A
How does seed investment work for startups?	84_1	How do we get seed investment for a startup ?	Seedcamp invests in three ways, including its Seed option. For pre-seed Startups must apply for an investment of either €75K for 7% or 3% as a warrant. Applications for pre-seed funding from Seedcamp are open four times a year. All Seedcamp companies can access the Platform.	1		How does seed financing work in startups ?	Seed money, or seed capital, is the first round of capital for a start-up business. It gets its name from the idea that early stage financing plants the seed that enables a small business to grow. Obtaining funding is one of the most critical aspects of starting a small business.	0		How do I get my startup seed money ?	Startups have several options for funding. Venture capital firms and angel investors may help startup companies begin operations, exchanging seed money for an equity stake in the firm. Venture capitalists and angel investors provide financing to a range of startups (a portfolio), with the expectation that a very small number of the start-ups will become viable and make money. In practice though, …	1		How does seed investment work for startups ?	On 6 April 2012, the Seed Enterprise Investment Scheme (SEIS) was launched by the UK Government, with the goal to "stimulate entrepreneurship and kick start the economy." The scheme offers up to 50% individual income tax relief, up to 28% capital gains tax relief and capital gains tax re-investment relief to investors who invest in eligible startup companies. Seedrs has a high concentration of SE…	2		27	FALSE	84_1_CAR_d0872f4b18968e1cabe040754f792e379d58e2f4	CAR_d0872f4b18968e1cabe040754f792e379d58e2f4	84_1_MARCO_3431810	MARCO_3431810	84_1_CAR_a41c4c4dd3dc4ac8dd1372c1c6fd99e80c691e33	CAR_a41c4c4dd3dc4ac8dd1372c1c6fd99e80c691e33		How does seed investment work for startups?	CAR_bf04191f77cab9e1af2f7a99928b9d390adbc1c2	84_1_CAR_bf04191f77cab9e1af2f7a99928b9d390adbc1c2	The Seed Enterprise Investment Scheme (SEIS) was launched by the United Kingdom government on 6 April 2012 in order to encourage investors to finance startups by providing tax breaks for backing projects they may otherwise view as too risky.	2		#N/A	#N/A	#N/A
How does seed investment work for startups?	84_1	How do we get seed investment for a startup ?	This is one of the most vital parts of the program. Successful entrepreneurs who manage to get their seed investment from Oasis500 gain an automatic incubation and acceleration period at Oasis500 offices in Jordan. This is a 3-month (100 days) period where startups accelerate and achieve milestones and goals that others without the same level of assistance usually need a significantly longer time…	#N/A	0	How does seed financing work in startups ?	Investors who provide seed capital funding often do so for a stake in the company. Once a startup has demonstrated feasibility, it is more likely to attract venture capital or angel investment to provide the greater funds necessary to get the business up and running.	1		How do I get my startup seed money ?	The odds of finding an angel investor for your startup are relatively low. Entrepreneurs generally turn to their friends and family first to raise seed funding to launch their companies. Before approaching your friends and family for money, make sure they know the risks and can take a financial loss if things go south.	#N/A	1	How does seed investment work for startups ?	The Seed Enterprise Investment Scheme (SEIS) was launched by the United Kingdom government on 6 April 2012 in order to encourage investors to finance startups by providing tax breaks for backing projects they may otherwise view as too risky.	0		27	FALSE	84_1_CAR_cdeeee324b55a3af04051cc87d92f6436079fd71	CAR_cdeeee324b55a3af04051cc87d92f6436079fd71	84_1_MARCO_3431811	MARCO_3431811	84_1_MARCO_1030166	MARCO_1030166		How does seed investment work for startups?	CAR_f049218e5d38036c81b0faffc5980e44e6c64b14	84_1_CAR_f049218e5d38036c81b0faffc5980e44e6c64b14	Seed money, sometimes known as seed funding or seed capital, is a form of securities offering in which an investor invests capital in exchange for an equity stake in the company. The term seed suggests that this is a very early investment, meant to support the business until it can generate cash of its own (see cash flow), or until it is ready for further investments. Seed money options include f…	0		0	#N/A	#N/A							0
How does seed investment work for startups?	84_1	How do we get seed investment for a startup ?	Investors who provide seed capital funding often do so for a stake in the company. Once a startup has demonstrated feasibility, it is more likely to attract venture capital or angel investment to provide the greater funds necessary to get the business up and running.	1		How does seed financing work in startups ?	Seed money, or seed capital, is the first round of capital for a start-up business. It gets its name from the idea that early stage financing plants the seed that enables a small business to grow.	#N/A	0	How do I get my startup seed money ?	Seed money, or seed capital, is the first round of capital for a start-up business. It gets its name from the idea that early stage financing plants the seed that enables a small business to grow. Obtaining funding is one of the most critical aspects of starting a small business.	0		How does seed investment work for startups ?	Seed money, sometimes known as seed funding or seed capital, is a form of securities offering in which an investor invests capital in exchange for an equity stake in the company. The term seed suggests that this is a very early investment, meant to support the business until it can generate cash of its own (see cash flow), or until it is ready for further investments. Seed money options include f…	4		27	FALSE	84_1_MARCO_3431811	MARCO_3431811	84_1_MARCO_3431812	MARCO_3431812	84_1_MARCO_3431810	MARCO_3431810		How does seed investment work for startups?	CAR_fef4c224bb39283d6c8f49190c9855514e0b7fa5	84_1_CAR_fef4c224bb39283d6c8f49190c9855514e0b7fa5	On 6 April 2012, the Seed Enterprise Investment Scheme (SEIS) was launched by the UK Government, with the goal to "stimulate entrepreneurship and kick start the economy." The scheme offers up to 50% individual income tax relief, up to 28% capital gains tax relief and capital gains tax re-investment relief to investors who invest in eligible startup companies. Seedrs has a high concentration of SE…	4		#N/A	0	#N/A
Tell me more about angel investment rounds.	84_2	What can I know more about Angel rounds ?	I want to write about the guardian angels separately because it is important for you to know who your immediate subtle friends are and what they can do for you. When we start an earthly life, no matter what religion we are affiliated to, God is offering us with Great generosity guardian angels.	#N/A	0	How should I learn about angel rounds ?	There are certain things you can probably learn from playing with Miguel Angel Jimenez. Andrew Johnson learned one of the most important lessons. Related: Miguel Angel Jimenez gives youth golf lesson after Scottish Open round.The 26-year-old from England finished his third round at the Scottish Open by making an eagle on 18 to card a 1-over par 71.While the shot was impressive, it was his celebra…	0		What are the different angel rounds for startups ?	Plastic Bottles by Shape. The shape of any plastic bottle is an important characteristic of your products packaging and should not be overlooked. Our plastic bottles come in five different shapes consisting of boston rounds, cosmo rounds, wide mouth rounds and pharmaceutical rounds, cylinders and ovals. Each shape has its own unique qualities. Click on any image below to learn more about each ind…	#N/A	0	Tell me more about angel rounds .	The track "She Moves She" was released as a 12-inch single on 31 March 2003, with "Cradle" on the B-side. Rounds was released on double vinyl and compact disc by Domino on 5 May 2003, spending one week on the UK Albums Chart at number 60. The second single, "As Serious as Your Life", was released in October 2003 on 7- and 12-inch formats featuring remixes and a 23-minute live version; a second 12…	0		28	TRUE	84_2_MARCO_5127122	MARCO_5127122	84_2_MARCO_3384119	MARCO_3384119	84_2_MARCO_3110649	MARCO_3110649		Tell me more about angel investment rounds.	CAR_9f0230efa0bbbfbff83a1e06459bcd41bb070b26	84_2_CAR_9f0230efa0bbbfbff83a1e06459bcd41bb070b26	Angel investors give you money. You sell them equity in the company, filing the investment raise with the SEC. Angel investments commonly run around $600,000. Most investments rounds also involve multiple investors, thanks to the proliferations of angel groups.	0		#N/A	#N/A	#N/A
Tell me more about angel investment rounds.	84_2	What can I know more about Angel rounds ?	A frantic Angel returns to his hotel room, where the police have found Epiphany raped, brutally murdered and wearing Angel's dog tags. When Angel reveals that Epiphany was his daughter, a detective tells him that he will "burn" for what he has done to her, to which Angel replies, "I know. In Hell." During the end credits, Angel is seen standing inside an iron Otis elevator which is descending. It…	#N/A	0	How should I learn about angel rounds ?	Q: When can I begin to learn new skills? A: In League of Angels, you may begin to learn new skills after reaching Lvl. 23. Q: How do I learn new skills? A: After clicking the Skill tab in the character menu, you can exchange âwarsoulsâ to learn new skills, or upgrade your existing ones.	#N/A	0	What are the different angel rounds for startups ?	There are different types of acne and learning which type you have is the first step to treating it. Learn more about the four acne types and the various treatments they may require to determine which type of acne you have and how you can best fight it. Types of Acne 1. Grade I Grade I acne is the mildest of acne types.	#N/A	0	Tell me more about angel rounds .	In 2011, the company secured $530,000 in angel financing. They also passed the milestone of being installed on more than 2,500 website. The investment brought their total funding from angel investors to $730,000. In order to keep up with the demand for the product, the company secured an additional round of angel funding in 2012.	0		28	TRUE	84_2_CAR_56c148da3a3c86712786b36a4e1ef5234ca58c6d	CAR_56c148da3a3c86712786b36a4e1ef5234ca58c6d	84_2_MARCO_2560631	MARCO_2560631	84_2_MARCO_6838037	MARCO_6838037		Tell me more about angel investment rounds.	CAR_5867355f5547df50ea8c35813dd9dc1e67876c22	84_2_CAR_5867355f5547df50ea8c35813dd9dc1e67876c22	Angel capital fills the gap in seed funding between "friends and family" and more robust start-up financing through formal venture capital. Although it is usually difficult to raise more than a few hundred thousand dollars from friends and family, most traditional venture capital funds are usually not able to make or evaluate small investments under US$1–2 million. Thus, angel investment is a com…	0		#N/A	#N/A	#N/A
Tell me more about angel investment rounds.	84_2	What can I know more about Angel rounds ?	Lorne says Eve was being sincere when he read her. Angel wants to know what Lindsey knows about the Senior Partners, but Spike points out that they will have a hard time figuring out which hell dimension Lindsey is in.	#N/A	0	How should I learn about angel rounds ?	Rufus and James are pleased to learn that Rufus has become a hit with the show's fans and their excitement doesn't go unnoticed by Angel. The remaining contestants face another elimination round.	#N/A	0	What are the different angel rounds for startups ?	Common Questions and Answers about How long to fast for glucose blood work blood I need to request time off of work for it, but I'm not sure how long I should request off.	#N/A	0	Tell me more about angel rounds .	Tell Me More was a National Public Radio interview show hosted by journalist Michel Martin. Tell Me More was first introduced online in December 2006 through an "open piloting" program called "Rough Cuts." Martin and the show's producers provided a regular podcast and blog on NPR's website, testing show ideas, offering sample segments, and soliciting user feedback. It began broadcasting on April …	0		28	TRUE	84_2_CAR_a456e0e6fc10145aedb83b9d9dc1d201331354a9	CAR_a456e0e6fc10145aedb83b9d9dc1d201331354a9	84_2_CAR_c5b8b57190f7d2315d8b667bb2ff22a966eff2f6	CAR_c5b8b57190f7d2315d8b667bb2ff22a966eff2f6	84_2_MARCO_2869736	MARCO_2869736		Tell me more about angel investment rounds.	CAR_251cfa99efb3b630a8dec30231d3ed362ecddd41	84_2_CAR_251cfa99efb3b630a8dec30231d3ed362ecddd41	When investing in a startup, there are different types of stages in which the investor can participate. The first round is called seed round. The seed round generally is when the startup is still in the very early phase of execution when their product is still in the prototype phase. At this level angel investors will be the ones participating. The next round is called Series A. At this point the…	0		#N/A	#N/A	#N/A
How does an angel investment round compare with crowdfunding?	84_3	What is the difference between crowdfunding and Angel rounds ?	The investor-led crowdfunding model differentiates itself from the usual company-led model by necessitating the participation of an experienced business angel in every round. This 'lead investor' conducts due diligence on the investment opportunity and negotiates the economic terms of the investment before contributing at least 25% of the round. The intended benefit is that any less experienced i…	3		How do crowdfunding and angel rounds compare ?	The investor-led crowdfunding model differentiates itself from the usual company-led model by necessitating the participation of an experienced business angel in every round. This 'lead investor' conducts due diligence on the investment opportunity and negotiates the economic terms of the investment before contributing at least 25% of the round. The intended benefit is that any less experienced i…	3		Can you contrast the angel rounds to crowdfunding ?	The investor-led crowdfunding model differentiates itself from the usual company-led model by necessitating the participation of an experienced business angel in every round. This 'lead investor' conducts due diligence on the investment opportunity and negotiates the economic terms of the investment before contributing at least 25% of the round. The intended benefit is that any less experienced i…	3		How does seed investment compare with crowdfunding ?	Seed capital can be distinguished from venture capital in that venture capital investments tend to come from institutional investors, involve significantly more money, are arm's length transactions, and involve much greater complexity in the contracts and corporate structure accompanying the investment. Seed funding involves a higher risk than normal venture capital funding since the investor doe…	2		29	FALSE	84_3_CAR_e4619747e10e10bb960487dc8dbdc5ef70ef85e3	CAR_e4619747e10e10bb960487dc8dbdc5ef70ef85e3	84_3_CAR_e4619747e10e10bb960487dc8dbdc5ef70ef85e3	CAR_e4619747e10e10bb960487dc8dbdc5ef70ef85e3	84_3_CAR_e4619747e10e10bb960487dc8dbdc5ef70ef85e3	CAR_e4619747e10e10bb960487dc8dbdc5ef70ef85e3		How does an angel investment round compare with crowdfunding?	CAR_0fbdd75221717e2e192570eeff574ac4072e77d9	84_3_CAR_0fbdd75221717e2e192570eeff574ac4072e77d9	The investor-led crowdfunding model differentiates itself from the usual company-led model by necessitating the participation of an experienced business angel in every round. This 'lead investor' conducts due diligence on the investment opportunity and negotiates the economic terms of the investment before contributing at least 25% of the round. The intended benefit is that any less experienced i…	2		#N/A	#N/A	#N/A
How does an angel investment round compare with crowdfunding?	84_3	What is the difference between crowdfunding and Angel rounds ?	A successful crowdfunding campaign helps prove to VCs, angel investors and banks that there is a demand for a product in a marketplace, removing some of the risk from the equation. . For startup founders, public crowdfunding is a way of pre-selling a product or service to test the market.	2		How do crowdfunding and angel rounds compare ?	A successful crowdfunding campaign helps prove to VCs, angel investors and banks that there is a demand for a product in a marketplace, removing some of the risk from the equation. . For startup founders, public crowdfunding is a way of pre-selling a product or service to test the market.	2		Can you contrast the angel rounds to crowdfunding ?	Funding your startup: Crowdfunding vs. angel investment vs. VC. New technologies have unlocked new ways to raise money for your startup. Here's how you can choose which type of funding is right for you from among the big three options. By Conner Forrest | July 22, 2014, 5:07 AM PST.	0		How does seed investment compare with crowdfunding ?	Unlike other crowdfunding platforms like Kickstarter and IndieGoGo, Seed&Spark is purpose-built for film & TV, and its crowdfunding page acts like a registry system, showing potential backers a budget determined by exactly what "WishList" items are needed and at what cost. The platform also allows backers to contribute cash or loan specific items to the project. Seed&Spark takes a 5% fee from suc…	#N/A	0	29	FALSE	84_3_MARCO_1030161	MARCO_1030161	84_3_MARCO_1030161	MARCO_1030161	84_3_MARCO_1030163	MARCO_1030163		How does an angel investment round compare with crowdfunding?	CAR_5cefa817070abab4d61a6d7f096b2852ef9c7653	84_3_CAR_5cefa817070abab4d61a6d7f096b2852ef9c7653	A small but increasing number of angel investors invest online through equity crowdfunding or organize themselves into angel groups or angel networks to share research and pool their investment capital, as well as to provide advice to their portfolio companies.	#N/A		#N/A	#N/A	#N/A
How does an angel investment round compare with crowdfunding?	84_3	What is the difference between crowdfunding and Angel rounds ?	Crowdfunding at a Glance. Crowdfunding is a method of raising capital through the collective effort of friends, family, customers, and individual investors. This approach taps into the collective efforts of a large pool of individualsâprimarily online via social media and crowdfunding platformsâand leverages their networks for greater reach and exposure.	#N/A	1	How do crowdfunding and angel rounds compare ?	A small but increasing number of angel investors invest online through equity crowdfunding or organize themselves into angel groups or angel networks to share research and pool their investment capital, as well as to provide advice to their portfolio companies.	0		Can you contrast the angel rounds to crowdfunding ?	A small but increasing number of angel investors invest online through equity crowdfunding or organize themselves into angel groups or angel networks to share research and pool their investment capital, as well as to provide advice to their portfolio companies.	0		How does seed investment compare with crowdfunding ?	SeedUps is an equity crowdfunding platform for seed investment to launch and focuses on startup companies. It was founded by Michael Faulkner and Gavin Gallagher in 2010 and is aimed at tech startups in the USA, Ireland and the UK. Since launch over 2200 tech businesses have registered. It is only available to accredited or sophisticated investors. The platform is headquartered in Republic of Ire…	0		29	FALSE	84_3_MARCO_632968	MARCO_632968	84_3_MARCO_1768258	MARCO_1768258	84_3_MARCO_1768258	MARCO_1768258		How does an angel investment round compare with crowdfunding?	CAR_e2dc126aa6be3b3253518a5e7a601808b64b5742	84_3_CAR_e2dc126aa6be3b3253518a5e7a601808b64b5742	A successful crowdfunding campaign helps prove to VCs, angel investors and banks that there is a demand for a product in a marketplace, removing some of the risk from the equation. . For startup founders, public crowdfunding is a way of pre-selling a product or service to test the market.	0		#N/A	#N/A	#N/A
How much is a typical A series investment round?	84_4	What 's the usual A - series round like for a startup ?	A series A round is the name typically given to a company's first significant round of venture capital financing. The name refers to the class of preferred stock sold to investors in exchange for their investment. It is usually the first series of stock after the common stock and common stock options issued to company founders, employees, friends and family and angel investors.	1		How much do you get for the Series A round of financing ?	They led the Series A round of financing for HealthLoop which closed at $10 million. They also led a Series B round of financing for Totango for Totango that raised $19.3 million.	#N/A	0	What is the usual A Series round for startups ?	DEFINITION of 'A Round Financing '. The first major round of business financing by private equity investors or venture capitalists. In private equity investing, an A round, or Series A financing, is usually in the form of convertible preferred stock.	#N/A	2	How much is a typical A series round for a startup ?	Series A rounds are traditionally a critical stage in the funding of new companies. A typical series A round is in the range of $2 million to $10 million, purchasing 10% to 30% of the company. The capital raised during a series A is usually intended to capitalize the company for 6 months to 2 years as it develops its products, performs initial marketing and branding, hires its initial employees, …	4		30	TRUE	84_4_CAR_1efba640126ff68a16d6bbb5f6ee1c7b94ef0f49	CAR_1efba640126ff68a16d6bbb5f6ee1c7b94ef0f49	84_4_CAR_efee632a6c3cae57b89d9fafb4cb6ad67df9a930	CAR_efee632a6c3cae57b89d9fafb4cb6ad67df9a930	84_4_MARCO_8433965	MARCO_8433965		How much is a typical A series investment round?	CAR_8775ef8c3e31222fb7adfae907695d416c5ee917	84_4_CAR_8775ef8c3e31222fb7adfae907695d416c5ee917	Series A rounds are traditionally a critical stage in the funding of new companies. A typical series A round is in the range of $2 million to $10 million, purchasing 10% to 30% of the company. The capital raised during a series A is usually intended to capitalize the company for 6 months to 2 years as it develops its products, performs initial marketing and branding, hires its initial employees, …	4		#N/A	#N/A	#N/A
How much is a typical A series investment round?	84_4	What 's the usual A - series round like for a startup ?	Series A rounds are traditionally a critical stage in the funding of new companies. A typical series A round is in the range of $2 million to $10 million, purchasing 10% to 30% of the company. The capital raised during a series A is usually intended to capitalize the company for 6 months to 2 years as it develops its products, performs initial marketing and branding, hires its initial employees, …	4		How much do you get for the Series A round of financing ?	Now that you have agreed on a company valuation with your investors, how do you calculate the price per share for your Series A financing? This can be especially tricky when the company has outstanding convertible notes that are converting into shares of preferred stock in connection with the Series A financing.	#N/A	0	What is the usual A Series round for startups ?	They led the Series A round of financing for HealthLoop which closed at $10 million. They also led a Series B round of financing for Totango for Totango that raised $19.3 million.	#N/A	0	How much is a typical A series round for a startup ?	The latest example of this is that Le Tote, the âNetflix for clothingâ startup that rents out apparel and accessories for women to wear and return (you can read a more in-depth description of the company here), has snapped up a hearty new Series A funding round worth $8.8 million led by Azure Capital Partners.	0		30	TRUE	84_4_CAR_8775ef8c3e31222fb7adfae907695d416c5ee917	CAR_8775ef8c3e31222fb7adfae907695d416c5ee917	84_4_MARCO_5788318	MARCO_5788318	84_4_CAR_efee632a6c3cae57b89d9fafb4cb6ad67df9a930	CAR_efee632a6c3cae57b89d9fafb4cb6ad67df9a930		How much is a typical A series investment round?	MARCO_5988952	84_4_MARCO_5988952	Smaller investment amounts are usually not worth the legal and financial expense, the burden on a company of adjusting its capital structure to serve new investors, and the analysis and due diligence on the part of institutional investors. A company that needs money for operations but is not yet ready for venture capital will typically seek angel capital. Larger amounts are usually unwarranted gi…	0		#N/A	#N/A	#N/A
How much is a typical A series investment round?	84_4	What 's the usual A - series round like for a startup ?	When investing in a startup, there are different types of stages in which the investor can participate. The first round is called seed round. The seed round generally is when the startup is still in the very early phase of execution when their product is still in the prototype phase. At this level angel investors will be the ones participating. The next round is called Series A. At this point the…	0		How much do you get for the Series A round of financing ?	Momo Inc. reportedly raised USD 2.5 million in Series A financing. Angel investor, PurpleSky Capital (ZiHui ChuangTou), and Matrix Hong Kong led this round of financing. However, Momo Inc.'s Form F-1 filed with the SEC reports that USD 5 million was raised in this round of financing. Momo Inc. completed its Series B financing in October 2012. This round of financing was led by two institution inv…	0		What is the usual A Series round for startups ?	The amount of equity that a note converts into depends on the price of the A round plus 2 key components of the your note. 1 Discount Rate: The discount rate establishes how much you will be compensated for the additional risk you take on by investing in a company before the series A investors.	0		How much is a typical A series round for a startup ?	The company received an initial seed round of $250,000. In September 2014, they raised another $1 million in its series A round of funding led by Tengelmann Ventures in Germany as well as investments from 500 Startups in the U.S. and Malaysia-based Asia Venture Group.	0		30	TRUE	84_4_CAR_7d5f02e994807ef1189d98f49b366781eaa2c622	CAR_7d5f02e994807ef1189d98f49b366781eaa2c622	84_4_CAR_28c0522578202d052cac98185927cefd4b947224	CAR_28c0522578202d052cac98185927cefd4b947224	84_4_MARCO_1331288	MARCO_1331288		How much is a typical A series investment round?	CAR_21e1b42e23f4b586be918059153fba57038863f3	84_4_CAR_21e1b42e23f4b586be918059153fba57038863f3	In September 2016 FinanceFox announced a Series A investment of $28m. The round was led by Target Global and Horizons Ventures - the private investment vehicle of Li Ka-Shing. This investment was the largest sum invested in an Insurtech company in Europe to date.	0		#N/A	#N/A	#N/A
What are the risks of investing in startups?	84_5	What danger is there to investing in an A - series round ?	A series A round is the name typically given to a company's first significant round of venture capital financing. The name refers to the class of preferred stock sold to investors in exchange for their investment. It is usually the first series of stock after the common stock and common stock options issued to company founders, employees, friends and family and angel investors.	0		What are the risks for investors in a Series A round of financing ?	Series A Round. Typically, the Series A is the company's first institutional financing, and is led by one or more venture investors. Valuation in this round will reflect progress made with seed capital, the quality of the management team and other qualitative assessments conducted in the seed round.	0		Is it risky to invest in an A Series round ?	Riskified secured $1.7 million in seed funding in 2012 from Genesis Partners. In 2014, Riskified secured an additional $4 million in a Series A funding round led by Genesis Partners and joined by notable investors, including Entree Capital and Founder Collective. In February 2016 Riskified secured an additional $25 million in a Series B funding round let by Qumra Capital and NTT DoCoMo Investment…	0		What are the risks of investing in a startup ?	Investors are generally most attracted to those new companies distinguished by their strong co-founding team, a balanced "risk/reward" profile (in which high risk due to the untested, disruptive innovations is balanced out by high potential returns) and "scalability" (the likelihood that a start-up can expand its operations by serving more markets or more customers). Attractive startups generally…	0		31	FALSE	84_5_CAR_1efba640126ff68a16d6bbb5f6ee1c7b94ef0f49	CAR_1efba640126ff68a16d6bbb5f6ee1c7b94ef0f49	84_5_MARCO_4731188	MARCO_4731188	84_5_CAR_d7b8262982a3d239f23de9583e479850d50ce50f	CAR_d7b8262982a3d239f23de9583e479850d50ce50f		What are the risks of investing in startups?	CAR_0275bfb718b64475376fc1154fa43f118c3a007d	84_5_CAR_0275bfb718b64475376fc1154fa43f118c3a007d	Investing in startups is risky business, and one of the best ways to manage the risk is to go with people who already have startup experience. Related: The 5 Best Pitch Tactics I Heard as an Angel Investor. I've heard this at least a dozen times in investor discussions: Bet on the jockey not the horse..	0		#N/A	#N/A	#N/A
What are the risks of investing in startups?	84_5	What danger is there to investing in an A - series round ?	The typical venture capital investment occurs after the seed funding round as the first round of institutional capital to fund growth (also referred to as Series A round) in the interest of generating a return through an eventual exit event, such as an IPO or trade sale of the company.n exchange for the high risk that venture capitalists assume by investing in smaller and less mature companies, v…	0		What are the risks for investors in a Series A round of financing ?	BREAKING DOWN 'A Round Financing '. When investing in companies, private equity investors typically prefer convertible preferred stock to common stock for the various rounds of financing, such as Series A, Series B etc., because of the special features of the security.	0		Is it risky to invest in an A Series round ?	The amount of equity that a note converts into depends on the price of the A round plus 2 key components of the your note. 1 Discount Rate: The discount rate establishes how much you will be compensated for the additional risk you take on by investing in a company before the series A investors.	0		What are the risks of investing in a startup ?	At this stage, the risk of losing the investment is tremendously high, because there are so many uncertain factors. The market research may reveal that there is no demand for the product or service, or it may reveal that there is already established companies serving this demand. Research by J.C. Ruhnka and J.E. Young shows that the risk of losing the investment for the VC firm is around 66.2% an…	0		31	FALSE	84_5_MARCO_2831591	MARCO_2831591	84_5_MARCO_8433967	MARCO_8433967	84_5_MARCO_1331288	MARCO_1331288		What are the risks of investing in startups?	CAR_19e37e12e6828f77be83a9d71827ae74dc6c3462	84_5_CAR_19e37e12e6828f77be83a9d71827ae74dc6c3462	Investors are generally most attracted to those new companies distinguished by their strong co-founding team, a balanced "risk/reward" profile (in which high risk due to the untested, disruptive innovations is balanced out by high potential returns) and "scalability" (the likelihood that a start-up can expand its operations by serving more markets or more customers). Attractive startups generally…	0		#N/A	#N/A	#N/A
What are the risks of investing in startups?	84_5	What danger is there to investing in an A - series round ?	BREAKING DOWN 'A Round Financing '. When investing in companies, private equity investors typically prefer convertible preferred stock to common stock for the various rounds of financing, such as Series A, Series B etc., because of the special features of the security.	0		What are the risks for investors in a Series A round of financing ?	A series A round is the name typically given to a company's first significant round of venture capital financing. The name refers to the class of preferred stock sold to investors in exchange for their investment. It is usually the first series of stock after the common stock and common stock options issued to company founders, employees, friends and family and angel investors.	0		Is it risky to invest in an A Series round ?	BREAKING DOWN 'A Round Financing '. When investing in companies, private equity investors typically prefer convertible preferred stock to common stock for the various rounds of financing, such as Series A, Series B etc., because of the special features of the security.	0		What are the risks of investing in a startup ?	Investing in startups is risky business, and one of the best ways to manage the risk is to go with people who already have startup experience. Related: The 5 Best Pitch Tactics I Heard as an Angel Investor. I've heard this at least a dozen times in investor discussions: Bet on the jockey not the horse..	0		31	FALSE	84_5_MARCO_8433967	MARCO_8433967	84_5_CAR_1efba640126ff68a16d6bbb5f6ee1c7b94ef0f49	CAR_1efba640126ff68a16d6bbb5f6ee1c7b94ef0f49	84_5_MARCO_8433967	MARCO_8433967		What are the risks of investing in startups?	MARCO_1768265	84_5_MARCO_1768265	At this stage, the risk of losing the investment is tremendously high, because there are so many uncertain factors. The market research may reveal that there is no demand for the product or service, or it may reveal that there is already established companies serving this demand. Research by J.C. Ruhnka and J.E. Young shows that the risk of losing the investment for the VC firm is around 66.2% an…	0		#N/A	#N/A	#N/A
What are the different types of instruments used by Venture Capitalists?	84_6	What are the types of instruments employed in the VC world ?	The instruments most commonly employed include several varieties of two-stringed bowed lutes; the zixian (字弦) erxian or touxian ((头弦) the lead instrument in the Kejia style, shorter and higher-pitched than the erxian), the tihu (of lower pitch than the zixian, adapted from the Cantonese gaohu) and the big and small yehu (coconut shell body), as well as several types of plucked lutes; the pipa, bi…	#N/A	0	What are the different kinds of instruments used by VCs for funding startups ?	Venture capitalists (VC) frequently use convertible equity to invest in startups. Convertible preferred equity blends features of debt and equity into a single security. Typically, the initial investment is structured as a debt claim, earning interest that accrues unpaid by the company.	1		What are some of the instruments used by VCs to raise money for startups ?	Venture capitalists (VC) frequently use convertible equity to invest in startups. Convertible preferred equity blends features of debt and equity into a single security. Typically, the initial investment is structured as a debt claim, earning interest that accrues unpaid by the company.	1		What are the different types of instruments used by VCs for seed investment ?	Venture capitalists (VC) frequently use convertible equity to invest in startups. Convertible preferred equity blends features of debt and equity into a single security. Typically, the initial investment is structured as a debt claim, earning interest that accrues unpaid by the company.	1		32	TRUE	84_6_CAR_51756c28399434b44810b844062e41f7516817dc	CAR_51756c28399434b44810b844062e41f7516817dc	84_6_MARCO_8742505	MARCO_8742505	84_6_MARCO_8742505	MARCO_8742505		What are the different types of instruments used by Venture Capitalists?	MARCO_8742505	84_6_MARCO_8742505	Venture capitalists (VC) frequently use convertible equity to invest in startups. Convertible preferred equity blends features of debt and equity into a single security. Typically, the initial investment is structured as a debt claim, earning interest that accrues unpaid by the company.	1		#N/A	#N/A	#N/A
What are the different types of instruments used by Venture Capitalists?	84_6	What are the types of instruments employed in the VC world ?	Equity Instruments. Equity instruments are papers that demonstrate an ownership interest in a business. Unlike debt instruments, equity instruments cede ownership, and some control, of a business to investors who provide private capital to a business. Stocks are equity instruments. Two main types of stocks exist. The first type is preferred stock. The second type is common stock. Businesses issue…	0		What are the different kinds of instruments used by VCs for funding startups ?	Unlike a convertible note, a safe is not a debt instrument. Debt instruments have maturity dates, are typically subject to certain regulations, create the threat of insolvency, and can include security interests and sometimes subordination agreements, all of which can have unintended negative consequences for startups.	#N/A	0	What are some of the instruments used by VCs to raise money for startups ?	Investment crowdfunding can be debt-based or equity-based, or can follow other models, including profit-sharing and hybrid models. The term equity crowdfunding is often used to describe crowd investing into both debt and equity based instruments when they are offered on an equity crowdfunding platform. The first known equity based crowdfunding platform for startups was launched as a private beta …	0		What are the different types of instruments used by VCs for seed investment ?	Convertible debt is an investment structure used by startups at a seed round. Convertible debt which will convert to stock in the startup's future.	0		32	TRUE	84_6_MARCO_7410795	MARCO_7410795	84_6_MARCO_1898773	MARCO_1898773	84_6_CAR_1407caa4deb3593336c24f607763bbae6457384b	CAR_1407caa4deb3593336c24f607763bbae6457384b		What are the different types of instruments used by Venture Capitalists?	MARCO_2918779	84_6_MARCO_2918779	There is also an in-depth study of contracts between different types of venture capital funds and entrepreneurial firms, including security design, and detailed cash flow, control and veto rights.	0	0	#N/A	#N/A	#N/A
What are the different types of instruments used by Venture Capitalists?	84_6	What are the types of instruments employed in the VC world ?	In addition, VC theory and VC dimension are instrumental in the theory of empirical processes, in the case of processes indexed by VC classes. Arguably these are the most important applications of the VC theory, and are employed in proving generalization. Several techniques will be introduced that are widely used in the empirical process and VC theory. The discussion is mainly based on the book W…	0		What are the different kinds of instruments used by VCs for funding startups ?	E. Mergers and acquisitions Due to the current economic climate, IPOs have become a rarer occurrence recently, causing venture capital firms to look towards mergers and acquisitions. This is a more realistic scenario, especially when startup companies do not look to function independently. Acquisition financing uses investment funds to acquire or buy another company. This may be completed by vent…	0		What are some of the instruments used by VCs to raise money for startups ?	Startups have several options for funding. Venture capital firms and angel investors may help startup companies begin operations, exchanging seed money for an equity stake in the firm. Venture capitalists and angel investors provide financing to a range of startups (a portfolio), with the expectation that a very small number of the start-ups will become viable and make money. In practice though, …	1		What are the different types of instruments used by VCs for seed investment ?	We provide $125,000 in seed investment upon acceptance into XRC Labs broken up into two instruments. We invest $50,000 in exchange for future 6 percent equity in your company when you do a preferred equity round. We use the SAFE document that greatly simplifies the legal setup.	0		32	TRUE	84_6_CAR_2d155339e9896cb2915f90f8206a1c49ea21f262	CAR_2d155339e9896cb2915f90f8206a1c49ea21f262	84_6_CAR_32493200d1ab1a2f63db192ba66f7415473889fe	CAR_32493200d1ab1a2f63db192ba66f7415473889fe	84_6_CAR_a41c4c4dd3dc4ac8dd1372c1c6fd99e80c691e33	CAR_a41c4c4dd3dc4ac8dd1372c1c6fd99e80c691e33		What are the different types of instruments used by Venture Capitalists?	MARCO_4774670	84_6_MARCO_4774670	Venture capital (VC) is a type of private equity, a form of financing that is provided by firms or funds to small, early-stage, emerging firms that are deemed to have high growth potential, or which have demonstrated high growth (in terms of number of employees, annual revenue, or both). Venture capital firms or funds invest in these early-stage companies in exchange for equity–an ownership stake…	0		#N/A	#N/A	#N/A
How much does a Lamborghini cost?	85_1	How much is a Lamborghini ?	How much does a Lamborghini cost? A Gallardo has an MSRP which can be anywhere from $200,000 to $230,000. The price, like other cars, will depend on the features you want to add. For example, the Gallardo has the âLP560-4 Coupeâ which can cost about $200,000, and the âSpyder Convertibleâ retails for around $225,000. A Murcielago, the more popular model, has an MSRP around $360,000 to as m…	4		How much does a Lamborghini cost to buy ?	How much does a Lamborghini cost? A Gallardo has an MSRP which can be anywhere from $200,000 to $230,000. The price, like other cars, will depend on the features you want to add. For example, the Gallardo has the âLP560-4 Coupeâ which can cost about $200,000, and the âSpyder Convertibleâ retails for around $225,000. A Murcielago, the more popular model, has an MSRP around $360,000 to as m…	4		How much does it cost to own a Lamborghini ?	How much does a Lamborghini cost? A Gallardo has an MSRP which can be anywhere from $200,000 to $230,000. The price, like other cars, will depend on the features you want to add. For example, the Gallardo has the âLP560-4 Coupeâ which can cost about $200,000, and the âSpyder Convertibleâ retails for around $225,000. A Murcielago, the more popular model, has an MSRP around $360,000 to as m…	4		How much does a used Lamborghini cost ?	The cheapest new 2010 Lamborghini is the Gallardo at just under $200,000. On the used market the average price of a Lamborghini listed in AutoTrader is $185,000 How do people afford such cars?	4		33	FALSE	85_1_MARCO_2375621	MARCO_2375621	85_1_MARCO_2375621	MARCO_2375621	85_1_MARCO_2375621	MARCO_2375621		How much does a Lamborghini cost?	MARCO_8828760	85_1_MARCO_8828760	How much does a Lamborghini cost? A Gallardo has an MSRP which can be anywhere from $200,000 to $230,000. The price, like other cars, will depend on the features you want to add. For example, the Gallardo has the âLP560-4 Coupeâ which can cost about $200,000, and the âSpyder Convertibleâ retails for around $225,000. A Murcielago, the more popular model, has an MSRP around $360,000 to as m…	4		#N/A	#N/A	#N/A
How much does a Lamborghini cost?	85_1	How much is a Lamborghini ?	How much does a Lamborghini cost? A Gallardo has an MSRP which can be anywhere from $200,000 to $230,000. A Murcielago, the more popular model, has an MSRP around $360,000 to as much as $455,000. Many Lamborghini dealers will also lease out their cars to qualified individuals.	4		How much does a Lamborghini cost to buy ?	How much does a Lamborghini cost? A Gallardo has an MSRP which can be anywhere from $200,000 to $230,000. A Murcielago, the more popular model, has an MSRP around $360,000 to as much as $455,000. Many Lamborghini dealers will also lease out their cars to qualified individuals.	4		How much does it cost to own a Lamborghini ?	How much does a Lamborghini cost? A Gallardo has an MSRP which can be anywhere from $200,000 to $230,000. A Murcielago, the more popular model, has an MSRP around $360,000 to as much as $455,000. Many Lamborghini dealers will also lease out their cars to qualified individuals.	4		How much does a used Lamborghini cost ?	How much does a Lamborghini cost? A Gallardo has an MSRP which can be anywhere from $200,000 to $230,000. The price, like other cars, will depend on the features you want to add. For example, the Gallardo has the âLP560-4 Coupeâ which can cost about $200,000, and the âSpyder Convertibleâ retails for around $225,000. A Murcielago, the more popular model, has an MSRP around $360,000 to as m…	4		33	FALSE	85_1_MARCO_541977	MARCO_541977	85_1_MARCO_541977	MARCO_541977	85_1_MARCO_541977	MARCO_541977		How much does a Lamborghini cost?	MARCO_2375621	85_1_MARCO_2375621	How much does a Lamborghini cost? A Gallardo has an MSRP which can be anywhere from $200,000 to $230,000. A Murcielago, the more popular model, has an MSRP around $360,000 to as much as $455,000. Many Lamborghini dealers will also lease out their cars to qualified individuals.	4		#N/A	#N/A	#N/A
How much does a Lamborghini cost?	85_1	How much is a Lamborghini ?	How much does a Lamborghini cost? A Gallardo has an MSRP which can be anywhere from $200,000 to $230,000. The price, like other cars, will depend on the features you want to add. For example, the Gallardo has the âLP560-4 Coupeâ which can cost about $200,000, and the âSpyder Convertibleâ retails for around $225,000.	4		How much does a Lamborghini cost to buy ?	How much does a Lamborghini cost? A Gallardo has an MSRP which can be anywhere from $200,000 to $230,000. The price, like other cars, will depend on the features you want to add. For example, the Gallardo has the âLP560-4 Coupeâ which can cost about $200,000, and the âSpyder Convertibleâ retails for around $225,000.	4		How much does it cost to own a Lamborghini ?	How much Does Lamborghini Gallardo Cost? If you are looking forward to owning a Lamborghini then Lamborghini Gallardo is the easiest way to do so with regard to cost. A new Lamborghini Gallardo can go for $200,000 or higher. The Gallardo LP560-4 went for around $205,000 when it was released. Gallardo cars are classic and many people would do anything to have them. Thatâs why second hand Gallard…	4		How much does a used Lamborghini cost ?	How much does a Lamborghini cost? A Gallardo has an MSRP which can be anywhere from $200,000 to $230,000. A Murcielago, the more popular model, has an MSRP around $360,000 to as much as $455,000. Many Lamborghini dealers will also lease out their cars to qualified individuals.	4		33	FALSE	85_1_MARCO_541979	MARCO_541979	85_1_MARCO_541979	MARCO_541979	85_1_MARCO_1460033	MARCO_1460033		How much does a Lamborghini cost?	MARCO_541977	85_1_MARCO_541977	How much does a Lamborghini cost? A Gallardo has an MSRP which can be anywhere from $200,000 to $230,000. The price, like other cars, will depend on the features you want to add. For example, the Gallardo has the âLP560-4 Coupeâ which can cost about $200,000, and the âSpyder Convertibleâ retails for around $225,000.	4		#N/A	#N/A	#N/A
How does a Lamborghini compare to a Ferrari?	85_2	How would a Lamborghini and a Ferrari compare ?	Opinions from WikiAnswers Users: A Lamborghini has more horsepower than a Ferrari, but a Ferrari has more control. Ferraris are proven to be competitive and have 50 years motor racing history behind them, which includes Formula One. Lamborgini doesn't have anywhere near the same racing history.	2		How different are a Ferrari and a Lamborghini ?	The Lamborghini Gallardo has ten cylinders and the Ferrari has eight cylinders. So the Lamborghini has more power and energy coming from the engine. The Lamborghini Gallardo and the Ferrari 458 Italia have many differences that make each car unique and extraordinary in their own way.	2		How do Lamborghinis compare to Ferraris ?	The Lamborghini Aventador is a full-on, range-topping supercar, while the Ferrari F12 Berlinetta is a potent GT-car with supercar performance. Powering the older Lamborghini Aventador is a 6.5-liter V12 engine pumping out 692hp. Consequently, the car can sprint from 0-100km/h in just 2.9 seconds. By comparison, the Ferrari F12 Berlinetta features an even more impressive 6.3-liter front-mounted V1…	3		How does a used Lamborghini compare to a Ferrari ?	The Lamborghini Aventador is a full-on, range-topping supercar, while the Ferrari F12 Berlinetta is a potent GT-car with supercar performance. Powering the older Lamborghini Aventador is a 6.5-liter V12 engine pumping out 692hp. Consequently, the car can sprint from 0-100km/h in just 2.9 seconds. By comparison, the Ferrari F12 Berlinetta features an even more impressive 6.3-liter front-mounted V1…	3		34	TRUE	85_2_MARCO_2728292	MARCO_2728292	85_2_MARCO_4838099	MARCO_4838099	85_2_MARCO_584979	MARCO_584979		How does a Lamborghini compare to a Ferrari?	MARCO_584979	85_2_MARCO_584979	Opinions from WikiAnswers Users: A Lamborghini has more horsepower than a Ferrari, but a Ferrari has more control. Ferraris are proven to be competitive and have 50 years motor racing history behind them, which includes Formula One. Lamborgini doesn't have anywhere near the same racing history.	3		#N/A	#N/A	#N/A
How does a Lamborghini compare to a Ferrari?	85_2	How would a Lamborghini and a Ferrari compare ?	The Lamborghini Aventador is a full-on, range-topping supercar, while the Ferrari F12 Berlinetta is a potent GT-car with supercar performance. Powering the older Lamborghini Aventador is a 6.5-liter V12 engine pumping out 692hp. Consequently, the car can sprint from 0-100km/h in just 2.9 seconds. By comparison, the Ferrari F12 Berlinetta features an even more impressive 6.3-liter front-mounted V1…	3		How different are a Ferrari and a Lamborghini ?	The Lamborghini Aventador is a full-on, range-topping supercar, while the Ferrari F12 Berlinetta is a potent GT-car with supercar performance. Powering the older Lamborghini Aventador is a 6.5-liter V12 engine pumping out 692hp. Consequently, the car can sprint from 0-100km/h in just 2.9 seconds. By comparison, the Ferrari F12 Berlinetta features an even more impressive 6.3-liter front-mounted V1…	3		How do Lamborghinis compare to Ferraris ?	Opinions from WikiAnswers Users: A Lamborghini has more horsepower than a Ferrari, but a Ferrari has more control. Ferraris are proven to be competitive and have 50 years motor racing history behind them, which includes Formula One. Lamborgini doesn't have anywhere near the same racing history.	2		How does a used Lamborghini compare to a Ferrari ?	But the reality is that Ferrari both retains and gains value much better than Lamborghini. If you look over the majority of auction sales or compare most new models, Ferrari sells at a higher premium than Lamborghini. It used to be a bigger gap, but Lamborghini has slowly chipped away at the difference.	3		34	TRUE	85_2_MARCO_584979	MARCO_584979	85_2_MARCO_584979	MARCO_584979	85_2_MARCO_2728292	MARCO_2728292		How does a Lamborghini compare to a Ferrari?	MARCO_584980	85_2_MARCO_584980	The Lamborghini Aventador is a full-on, range-topping supercar, while the Ferrari F12 Berlinetta is a potent GT-car with supercar performance. Powering the older Lamborghini Aventador is a 6.5-liter V12 engine pumping out 692hp. Consequently, the car can sprint from 0-100km/h in just 2.9 seconds. By comparison, the Ferrari F12 Berlinetta features an even more impressive 6.3-liter front-mounted V1…	3		#N/A	#N/A	#N/A
How does a Lamborghini compare to a Ferrari?	85_2	How would a Lamborghini and a Ferrari compare ?	But the reality is that Ferrari both retains and gains value much better than Lamborghini. If you look over the majority of auction sales or compare most new models, Ferrari sells at a higher premium than Lamborghini. It used to be a bigger gap, but Lamborghini has slowly chipped away at the difference.	3		How different are a Ferrari and a Lamborghini ?	While the Lamborghini is a greater powerhouse, with a larger engine and significantly more torque than the Ferrari, it does not brake as quickly. It is also significantly more expensive than the Ferrari.	2		How do Lamborghinis compare to Ferraris ?	While the Lamborghini is a greater powerhouse, with a larger engine and significantly more torque than the Ferrari, it does not brake as quickly. It is also significantly more expensive than the Ferrari.	2		How does a used Lamborghini compare to a Ferrari ?	Opinions from WikiAnswers Users: A Lamborghini has more horsepower than a Ferrari, but a Ferrari has more control. Ferraris are proven to be competitive and have 50 years motor racing history behind them, which includes Formula One. Lamborgini doesn't have anywhere near the same racing history.	2		34	TRUE	85_2_MARCO_584980	MARCO_584980	85_2_MARCO_3246899	MARCO_3246899	85_2_MARCO_3246899	MARCO_3246899		How does a Lamborghini compare to a Ferrari?	MARCO_2728292	85_2_MARCO_2728292	While the Lamborghini is a greater powerhouse, with a larger engine and significantly more torque than the Ferrari, it does not brake as quickly. It is also significantly more expensive than the Ferrari.	2		#N/A	#N/A	#N/A
Interesting. How much does a pimped-out food truck cost?	85_3	How much for a pimped - out truck ?	The cost of a food truck varies wildly across the United States, but Matt says in the Bay Area an owner should expect to spend about $50,000 on the cheapest end. That figure can range all the way up to $200,000 for a âtotally customized, pimped-out, brand new construction vehicle.â.	4		How much would a pimped - out food truck be ?	The cost of a food truck varies wildly across the United States, but Matt says in the Bay Area an owner should expect to spend about $50,000 on the cheapest end. That figure can range all the way up to $200,000 for a totally customized, pimped-out, brand new construction vehicle..	4		What would a pimped - out food truck be around ?	The cost of a food truck varies wildly across the United States, but Matt says in the Bay Area an owner should expect to spend about $50,000 on the cheapest end. That figure can range all the way up to $200,000 for a âtotally customized, pimped-out, brand new construction vehicle.â.	4		What about for a pimped - out food truck ?	The cost of a food truck varies wildly across the United States, but Matt says in the Bay Area an owner should expect to spend about $50,000 on the cheapest end. That figure can range all the way up to $200,000 for a âtotally customized, pimped-out, brand new construction vehicle.â.	4		35	FALSE	85_3_MARCO_1091415	MARCO_1091415	85_3_MARCO_2228679	MARCO_2228679	85_3_MARCO_1091415	MARCO_1091415		Interesting. How much does a pimped-out food truck cost?	MARCO_1091415	85_3_MARCO_1091415	The cost of a food truck varies wildly across the United States, but Matt says in the Bay Area an owner should expect to spend about $50,000 on the cheapest end. That figure can range all the way up to $200,000 for a totally customized, pimped-out, brand new construction vehicle..	4		#N/A	#N/A	#N/A
Interesting. How much does a pimped-out food truck cost?	85_3	How much for a pimped - out truck ?	The cost of a food truck varies wildly across the United States, but Matt says in the Bay Area an owner should expect to spend about $50,000 on the cheapest end. That figure can range all the way up to $200,000 for a totally customized, pimped-out, brand new construction vehicle..	4		How much would a pimped - out food truck be ?	The cost of a food truck varies wildly across the United States, but Matt says in the Bay Area an owner should expect to spend about $50,000 on the cheapest end. That figure can range all the way up to $200,000 for a âtotally customized, pimped-out, brand new construction vehicle.â.	4		What would a pimped - out food truck be around ?	The cost of a food truck varies wildly across the United States, but Matt says in the Bay Area an owner should expect to spend about $50,000 on the cheapest end. That figure can range all the way up to $200,000 for a totally customized, pimped-out, brand new construction vehicle..	4		What about for a pimped - out food truck ?	The cost of a food truck varies wildly across the United States, but Matt says in the Bay Area an owner should expect to spend about $50,000 on the cheapest end. That figure can range all the way up to $200,000 for a totally customized, pimped-out, brand new construction vehicle..	4		35	FALSE	85_3_MARCO_2228679	MARCO_2228679	85_3_MARCO_1091415	MARCO_1091415	85_3_MARCO_2228679	MARCO_2228679		Interesting. How much does a pimped-out food truck cost?	MARCO_2228679	85_3_MARCO_2228679	The cost of a food truck varies wildly across the United States, but Matt says in the Bay Area an owner should expect to spend about $50,000 on the cheapest end. That figure can range all the way up to $200,000 for a âtotally customized, pimped-out, brand new construction vehicle.â.	4		#N/A	#N/A	#N/A
Interesting. How much does a pimped-out food truck cost?	85_3	How much for a pimped - out truck ?	Unable to understand how truck-driving can be so hard, the presenters each bought a second-hand lorry for under £5,000. May bought a Scania P94D, Clarkson bought a Renault Magnum and Hammond bought an ERF EC11. Clarkson painted his truck black, resulting in multiple visibility problems. Hammond tried to Americanize his truck by attaching a dog kennel to the front of his truck. May attached many f…	#N/A	0	How much would a pimped - out food truck be ?	Forbes Magazine, estimates that an average cost for a food truck is closer to $50,000 - $70,000. This price would include a gently used food truck and âreasonableâ remodels. If you are willing to spend between $50,000 - $100,000 you can get extra bells and whistles or a completely new truck.	3		What would a pimped - out food truck be around ?	Forbes Magazine, estimates that an average cost for a food truck is closer to $50,000 - $70,000. This price would include a gently used food truck and âreasonableâ remodels. If you are willing to spend between $50,000 - $100,000 you can get extra bells and whistles or a completely new truck.	3		What about for a pimped - out food truck ?	Forbes Magazine, estimates that an average cost for a food truck is closer to $50,000 - $70,000. This price would include a gently used food truck and âreasonableâ remodels. If you are willing to spend between $50,000 - $100,000 you can get extra bells and whistles or a completely new truck.	3		35	FALSE	85_3_CAR_44bb80dd545db01442772f452d7c0b856d4776f3	CAR_44bb80dd545db01442772f452d7c0b856d4776f3	85_3_MARCO_7393098	MARCO_7393098	85_3_MARCO_7393098	MARCO_7393098		Interesting. How much does a pimped-out food truck cost?	MARCO_7393098	85_3_MARCO_7393098	1 Mobile-cuisine.com said that a food truck wrap can cost anywhere from $2,500 up to $5,000. 2 RoamingHunger.com claimed that their quotes ranged anywhere from $2,500 to as much as $5,000. 3 Food Truck wraps are done the same way as any car wrap, by applying a thin vinyl film across the body of the vehicle.	3		#N/A	#N/A	#N/A
What licenses and permits are needed for a food truck?	85_4	What licenses do I need to be an owner of a Lamborghini ?	In 1995, Indonesian corporation MegaTech, Lamborghini's owner at the time, entered into distribution and license agreements with Mexican businessman Jorge Antonio Fernandez Garcia. The agreements give Automóviles Lamborghini Latinoamérica S.A. de C.V. the exclusive distributorship of Lamborghini vehicles and branded merchandise in Latin America and South America. Under the agreements, Automóviles…	0		What permits are required for a pimped - out food truck ?	Legal definitions and requirements for food trucks vary widely by country and locality. For example, in Toronto, Canada, some of the requirements include business and liability insurance, a Commercial Vehicle Operator’s Registration for the truck, permits for each municipality being operated in (downtown, various suburbs), a food handler certificate, appropriate driver's licenses for drivers, ass…	4		What licenses do I need for a pimped - out food truck ?	Legal definitions and requirements for food trucks vary widely by country and locality. For example, in Toronto, Canada, some of the requirements include business and liability insurance, a Commercial Vehicle Operator’s Registration for the truck, permits for each municipality being operated in (downtown, various suburbs), a food handler certificate, appropriate driver's licenses for drivers, ass…	4		What licenses and permits are needed for a pimped - out food truck ?	Legal definitions and requirements for food trucks vary widely by country and locality. For example, in Toronto, Canada, some of the requirements include business and liability insurance, a Commercial Vehicle Operator’s Registration for the truck, permits for each municipality being operated in (downtown, various suburbs), a food handler certificate, appropriate driver's licenses for drivers, ass…	4		36	TRUE	85_4_CAR_ebc926d1cb6894bfab88ac921890461a6168675c	CAR_ebc926d1cb6894bfab88ac921890461a6168675c	85_4_CAR_ddb17bf9b00536f2f8546e0c0ed839a280783c27	CAR_ddb17bf9b00536f2f8546e0c0ed839a280783c27	85_4_CAR_ddb17bf9b00536f2f8546e0c0ed839a280783c27	CAR_ddb17bf9b00536f2f8546e0c0ed839a280783c27		What licenses and permits are needed for a food truck?	CAR_ddb17bf9b00536f2f8546e0c0ed839a280783c27	85_4_CAR_ddb17bf9b00536f2f8546e0c0ed839a280783c27	Health Permit. One of the first things you need to do as a food truck operator is get your health permit, which will determine where youâre legal to serve. That will, in turn, determine so much of your service: the location, hours, your audience, and other street food vendors you may partner with.	4		#N/A	#N/A	#N/A
What licenses and permits are needed for a food truck?	85_4	What licenses do I need to be an owner of a Lamborghini ?	Lamborghini licenses its brand to manufacturers that produce a variety of Lamborghini-branded consumer goods including scale models, clothing, accessories, bags, electronics and laptop computers.	0		What permits are required for a pimped - out food truck ?	Health Permit. One of the first things you need to do as a food truck operator is get your health permit, which will determine where youâre legal to serve. That will, in turn, determine so much of your service: the location, hours, your audience, and other street food vendors you may partner with.	2		What licenses do I need for a pimped - out food truck ?	Health Permit. One of the first things you need to do as a food truck operator is get your health permit, which will determine where youâre legal to serve. That will, in turn, determine so much of your service: the location, hours, your audience, and other street food vendors you may partner with.	2		What licenses and permits are needed for a pimped - out food truck ?	Health Permit. One of the first things you need to do as a food truck operator is get your health permit, which will determine where youâre legal to serve. That will, in turn, determine so much of your service: the location, hours, your audience, and other street food vendors you may partner with.	2		36	TRUE	85_4_CAR_7df39de2979db9c457c8ce1aefc757a6ac60fb8c	CAR_7df39de2979db9c457c8ce1aefc757a6ac60fb8c	85_4_MARCO_5340624	MARCO_5340624	85_4_MARCO_5340624	MARCO_5340624		What licenses and permits are needed for a food truck?	MARCO_5340624	85_4_MARCO_5340624	Legal definitions and requirements for food trucks vary widely by country and locality. For example, in Toronto, Canada, some of the requirements include business and liability insurance, a Commercial Vehicle Operator’s Registration for the truck, permits for each municipality being operated in (downtown, various suburbs), a food handler certificate, appropriate driver's licenses for drivers, ass…	2		#N/A	#N/A	#N/A
What licenses and permits are needed for a food truck?	85_4	What licenses do I need to be an owner of a Lamborghini ?	Not too flashy for a ticket! Tron-like Lamborghini that 'glows in the dark' is seized in London after Qatari driver is pulled over for driving without a licence. Police impound Â£350,000 supercar after owner fails to produce documents. Purple Lamborghini Aventador customised to 'glow in the dark'.	#N/A	0	What permits are required for a pimped - out food truck ?	Health Permit. One of the first things you need to do as a food truck operator is get your health permit, which will determine where youâre legal to serve. That will, in turn, determine so much of your service: the location, hours, your audience, and other street food vendors you may partner with.ealth Permit. One of the first things you need to do as a food truck operator is get your health pe…	3		What licenses do I need for a pimped - out food truck ?	Food carts and trucks in the City must be licensed. You must have a license, which is a photo ID badge, to run a food-selling business from a pushcart or truck, either year-round or seasonally. This license is called a Mobile Food Vendor Personal License.	4		What licenses and permits are needed for a pimped - out food truck ?	To sell food on the streets, you will need a general business license a DBA and a sellers permit. Step 2. First, prepare your truck or food cart, and obtain the general business license, a DBA registration if you use a trade name such as Street Food is Good Food, and also obtain a sellers permit.	2		36	TRUE	85_4_MARCO_7610128	MARCO_7610128	85_4_MARCO_8598014	MARCO_8598014	85_4_MARCO_4157151	MARCO_4157151		What licenses and permits are needed for a food truck?	MARCO_7568685	85_4_MARCO_7568685	To sell food on the streets, you will need a general business license a DBA and a sellers permit. Step 2. First, prepare your truck or food cart, and obtain the general business license, a DBA registration if you use a trade name such as Street Food is Good Food, and also obtain a sellers permit.	2		#N/A	#N/A	#N/A
What makes a good food truck location?	85_5	What are some of the best locations to buy a Lamborghini ?	Popular Lamborghini Locations. 1 Lamborghini cars & trucks for sale in Richardson, TX. 2 Lamborghini cars & trucks for sale in North Miami Beach, FL. 3 Lamborghini cars & trucks for sale in West Palm Beach, FL. Lamborghini cars & trucks for sale in Houston, 1 TX. Lamborghini cars & trucks for sale in Costa Mesa, CA.	0		How do successful food trucks choose their location ?	The three drive the food truck across the country back to Los Angeles, serving top-quality Cuban sandwiches and yuca fries. Percy finds ways to promote the food truck on social media websites, and the truck becomes successful in New Orleans and Austin, Texas, where the daily specials include items made with local ingredients such as po' boys and barbecued brisket.	0		What are some good locations for a pimped - out food truck ?	Research locations. With a food truck, you can travel to new locations and develop multiple customer bases. You should research prime selling spots, such as business parks, farmerâs markets or roaming food truck events. Zoning regulations and other restrictions may limit your options, however.	4		What makes a good location for a pimped - out food truck ?	Research locations. With a food truck, you can travel to new locations and develop multiple customer bases. You should research prime selling spots, such as business parks, farmerâs markets or roaming food truck events. Zoning regulations and other restrictions may limit your options, however.	4		37	FALSE	85_5_MARCO_2034826	MARCO_2034826	85_5_CAR_8d575983dbb23ffd314c351e2b31558d0e08d52c	CAR_8d575983dbb23ffd314c351e2b31558d0e08d52c	85_5_MARCO_1490466	MARCO_1490466		What makes a good food truck location?	MARCO_1490466	85_5_MARCO_1490466	Prior to opening a restaurant location, the business functioned primarily as a mobile kitchen or food truck. The trucks make scheduled stops in the mornings, afternoons and evenings in highly commercial areas, in areas that appeal to consumers in the white-collar workforce, in addition to manual laborers, the stereotypical customers for such establishments. Example stops include tech-industry hub…	4		#N/A	#N/A	#N/A
What makes a good food truck location?	85_5	What are some of the best locations to buy a Lamborghini ?	Lamborghini Aventadors by City. 1 Lamborghini Aventadors for Sale in Atlanta, GA. 2 Lamborghini Aventadors for Sale in El Paso, TX. 3 Lamborghini Aventadors for Sale in Seattle, WA. 4 Lamborghini Aventadors for Sale in Houston, TX. 5 Lamborghini Aventadors for Sale in Philadelphia, PA. 6 Lamborghini Aventadors for Sale in Oklahoma City, OK.	#N/A	0	How do successful food trucks choose their location ?	âFood trucks must face many barriers in order to break through and find success. These include overcoming a lack of physical location, meeting governmental regulations, finding a way to achieve operational efficiencies, and meeting the needs of mobile consumers.	#N/A	0	What are some good locations for a pimped - out food truck ?	Food trucks, food trucks everywhere. There are over 3 million food trucks around the United States, with the top cities for food truckage being Los Angeles, New York, Austin, Chicago, Houston, Portland, Cleveland, Washington, D.C., Boston, and Miami. (Source) This yearâs food trucks were dominated by tasty tacos, Korean-fusion foods, and, of course, good old-fashioned french fries.	4		What makes a good location for a pimped - out food truck ?	The now-defunct Real Good Truck. There are many reasons why a food truck may not succeed. The first things that come to mind are the menu, bad locations, poor marketing and branding, problems with employees and staffing, or not have enough dough (and we donât mean the bakery kind).	0		37	FALSE	85_5_MARCO_8024009	MARCO_8024009	85_5_MARCO_3633611	MARCO_3633611	85_5_MARCO_3360846	MARCO_3360846		What makes a good food truck location?	MARCO_6213688	85_5_MARCO_6213688	Research locations. With a food truck, you can travel to new locations and develop multiple customer bases. You should research prime selling spots, such as business parks, farmerâs markets or roaming food truck events. Zoning regulations and other restrictions may limit your options, however.	0		#N/A	0	#N/A
What makes a good food truck location?	85_5	What are some of the best locations to buy a Lamborghini ?	Lamborghini Aventadors by City. 1 Lamborghini Aventadors for Sale in Denver, CO. 2 Lamborghini Aventadors for Sale in Atlanta, GA. 3 Lamborghini Aventadors for Sale in San Antonio, TX. Lamborghini Aventadors for Sale in Portland, 1 OR. Lamborghini Aventadors for Sale in Washington, 2 DC. Lamborghini Aventadors for Sale in Raleigh, NC.	#N/A	0	How do successful food trucks choose their location ?	Many food truck owners have found that their sales increase when they sell in a food truck park or at an event attended by other food trucks because people are more likely to buy one thing from each truck so that they can sample everything.	4		What are some good locations for a pimped - out food truck ?	Food trucks have become a popular phenomenon in Tampa and St. Petersburg, Florida. Food trucks have a large following in and around downtown Tampa and have been supported by Tampa mayor Bob Buckhorn who organized a monthly food truck rally downtown. There is also an evening of food trucks and short movies (Flicks and Food Trucks) between downtown and the Channelside District. Food truck rallies d…	3		What makes a good location for a pimped - out food truck ?	Prior to opening a restaurant location, the business functioned primarily as a mobile kitchen or food truck. The trucks make scheduled stops in the mornings, afternoons and evenings in highly commercial areas, in areas that appeal to consumers in the white-collar workforce, in addition to manual laborers, the stereotypical customers for such establishments. Example stops include tech-industry hub…	4		37	FALSE	85_5_MARCO_1460029	MARCO_1460029	85_5_MARCO_7437390	MARCO_7437390	85_5_CAR_4225c1d6437458f2b7c99ca1d526f5452873b850	CAR_4225c1d6437458f2b7c99ca1d526f5452873b850		What makes a good food truck location?	CAR_c20a9ae9684abfa2b3400cd5c2ed10577c9b1e7d	85_5_CAR_c20a9ae9684abfa2b3400cd5c2ed10577c9b1e7d	The now-defunct Real Good Truck. There are many reasons why a food truck may not succeed. The first things that come to mind are the menu, bad locations, poor marketing and branding, problems with employees and staffing, or not have enough dough (and we donât mean the bakery kind).	4		#N/A	#N/A	#N/A
What is a typical day like running a food truck?	85_6	What are the daily routines of an owner of a Lamborghini ?	One owner secretly records their reactions. 1 Allen Wong made millions after he created a phone app called Radio 5-0. 2 He subsequently bought a 2012 Lamborghini Aventador worth Â£260,000. 3 But he claims to have been heavily abused while driving the flash car. So he decided to make a video filming the reactions he received.	#N/A	0	How is the day like running a pimped - out food truck ?	For the lunch rush, which is primarily where a food truck is going to be doing their business for the day, there's hours of prep, loading, parking, setup â¦ hours of cleaning and potentially prep for the next day, said Weber. You can easily work an eight- to 10-hour day for two hours of service..	3		What are some of the day - to - day activities of a pimped - out food truck ?	For the lunch rush, which is primarily where a food truck is going to be doing their business for the day, there's hours of prep, loading, parking, setup â¦ hours of cleaning and potentially prep for the next day, said Weber. You can easily work an eight- to 10-hour day for two hours of service..	3		What is a typical day like for a pimped - out food truck ?	For the lunch rush, which is primarily where a food truck is going to be doing their business for the day, there's hours of prep, loading, parking, setup â¦ hours of cleaning and potentially prep for the next day, said Weber. You can easily work an eight- to 10-hour day for two hours of service..	3		38	TRUE	85_6_MARCO_4119304	MARCO_4119304	85_6_MARCO_5768030	MARCO_5768030	85_6_MARCO_5768030	MARCO_5768030		What is a typical day like running a food truck?	MARCO_5768030	85_6_MARCO_5768030	Running a food truck is easy. To run a food truck, you need to be on the streets six or seven days a week serving lunch and dinner, not to mention the need to be present at any food truck event that pops up. Owning a food truck means working a majority of your waking hours, especially at the start of your business.	3		#N/A	#N/A	#N/A
What is a typical day like running a food truck?	85_6	What are the daily routines of an owner of a Lamborghini ?	The Gallardo is the most practical of the Lamborghinis (as far as Lambos go) and, some might argue, the prettiest as well.It certainly warms the cockles of your heart to see a Spyder standing in the sun-but if you're on a budget, get the two-wheel drive coupe, it will cost you less.Compare. Compare.ccording to reports the yet unidentified owner of INR 2.5-crore Italian super car escaped the fatef…	#N/A	0	How is the day like running a pimped - out food truck ?	Running a food truck is easy. To run a food truck, you need to be on the streets six or seven days a week serving lunch and dinner, not to mention the need to be present at any food truck event that pops up. Owning a food truck means working a majority of your waking hours, especially at the start of your business.	4		What are some of the day - to - day activities of a pimped - out food truck ?	Running a food truck is easy. To run a food truck, you need to be on the streets six or seven days a week serving lunch and dinner, not to mention the need to be present at any food truck event that pops up. Owning a food truck means working a majority of your waking hours, especially at the start of your business.	4		What is a typical day like for a pimped - out food truck ?	Running a food truck is easy. To run a food truck, you need to be on the streets six or seven days a week serving lunch and dinner, not to mention the need to be present at any food truck event that pops up. Owning a food truck means working a majority of your waking hours, especially at the start of your business.	4		38	TRUE	85_6_MARCO_6602788	MARCO_6602788	85_6_MARCO_5768036	MARCO_5768036	85_6_MARCO_5768036	MARCO_5768036		What is a typical day like running a food truck?	MARCO_5768036	85_6_MARCO_5768036	For the lunch rush, which is primarily where a food truck is going to be doing their business for the day, there's hours of prep, loading, parking, setup â¦ hours of cleaning and potentially prep for the next day, said Weber. You can easily work an eight- to 10-hour day for two hours of service..	4		#N/A	#N/A	#N/A
What is a typical day like running a food truck?	85_6	What are the daily routines of an owner of a Lamborghini ?	Lamborghini's increasing wealth allowed him to purchase faster, more expensive cars than the tiny Fiats he had tinkered with during his youth. He owned cars such as Alfa Romeos and Lancias during the early 1950s, and at one point, had enough cars to use a different one every day of the week, adding a Mercedes-Benz 300SL, a Jaguar E-Type coupé, and two Maserati 3500 GTs. Of the latter, Lamborghini…	0		How is the day like running a pimped - out food truck ?	Later that day, they meet Donna (K.D. Aubert) and Money Mike (Katt Williams), who run a fledgling shop called 'Pimps and Hoes.' The shopping center is also the home of a BBQ rib restaurant called 'Bros. BBQ', owned by the cousins' fathers, Willie (John Witherspoon) and Elroy (Don "D.C." Curry).	#N/A	0	What are some of the day - to - day activities of a pimped - out food truck ?	A food truck, mobile kitchen, mobile canteen, roach coach, gut truck, catering truck, or (in Austin, Texas) food trailer, is a mobile venue that transports and sells food. Some, including ice cream trucks, sell frozen or prepackaged food; others resemble restaurants on wheels. Some may cater to specific meals, such as the breakfast truck, lunch truck or lunch wagon, snack truck, kebab trailer (UK…	0		What is a typical day like for a pimped - out food truck ?	A food truck is a large vehicle equipped to cook and sell food. Some, including ice cream trucks, sell frozen or prepackaged food; others have on-board kitchens and prepare food from scratch. Sandwiches, hamburgers, french fries, and other regional fast food fare is common. In recent years, associated with the pop-up restaurant phenomenon, food trucks offering gourmet cuisine and a variety of spe…	1		38	TRUE	85_6_CAR_4a9d6b869b6ffcec6c3b9c2f5e28a00a5e913d82	CAR_4a9d6b869b6ffcec6c3b9c2f5e28a00a5e913d82	85_6_CAR_8a7d5d5bca68a715dc73516bfb45509df6d508f1	CAR_8a7d5d5bca68a715dc73516bfb45509df6d508f1	85_6_CAR_ea1a6b99547ea31a93b5ea59a1ef85280be744dc	CAR_ea1a6b99547ea31a93b5ea59a1ef85280be744dc		What is a typical day like running a food truck?	CAR_f5eb3f15079fafbea5cb667595db6064e4a325cc	85_6_CAR_f5eb3f15079fafbea5cb667595db6064e4a325cc	A food truck is a large vehicle equipped to cook and sell food. Some, including ice cream trucks, sell frozen or prepackaged food; others have on-board kitchens and prepare food from scratch. Sandwiches, hamburgers, french fries, and other regional fast food fare is common. In recent years, associated with the pop-up restaurant phenomenon, food trucks offering gourmet cuisine and a variety of spe…	1		#N/A	#N/A	#N/A
How can I run a successful food truck?	85_7	How can I manage a Lamborghini successfully ?	There’s also a ‘Lamborghini Dinamica Veicolo Attiva’ (LDVA) control unit, to manage all of the new systems. Using sensors all over the car to determine the best set-up for all conditions. You can choose from four chassis modes that changes the torque/ESC interface - Sport, Strada, Corsa and Ego (the latter being of course, individual). It’s Sport you want, as that sends 90 per cent of the torque …	#N/A	0	How do you run a food truck well ?	Running a food truck is easy. To run a food truck, you need to be on the streets six or seven days a week serving lunch and dinner, not to mention the need to be present at any food truck event that pops up. Owning a food truck means working a majority of your waking hours, especially at the start of your business.	3		What factors influenced a pimped - out food truck 's success ?	A modern-day food truck isn't just an ordinary taco truck one might find at a construction site. In 2009, New York magazine noted that the food truck had "largely transcended its roach-coach classification and is now a respectable venue for aspiring chefs to launch careers." These gourmet trucks' menus run the gamut of ethnic and fusion cuisine. Often focusing on limited but creative dishes at re…	1		How can I run a pimped - out food truck successfully ?	Here are nine tips for potential food truck operators: 1 How to find your food truck. 2 You can get a food truck for as little as $25,000 and for as much as $125,000.3 But donât cut corners on your build, says Chris Johnston, owner and founder of Cheesie's Pub & Grub and food truck in Chicago.ere are nine tips for potential food truck operators: 1 How to find your food truck. 2 Secure a commiss…	2		39	FALSE	85_7_CAR_20cd6b7a46afaa70fe87737383144a376f41fbb1	CAR_20cd6b7a46afaa70fe87737383144a376f41fbb1	85_7_MARCO_5768036	MARCO_5768036	85_7_CAR_847f5f133e932d11811a87814c9040bb685fee74	CAR_847f5f133e932d11811a87814c9040bb685fee74		How can I run a successful food truck?	MARCO_8598009	85_7_MARCO_8598009	Talk with someone who already owns a food truck and negotiate a lease or a rental agreement. Start with a low-cost, used cart or trailer. Start selling at a farmers market, art fair booth or pop-up. Talk to a successful restaurant owner about running a food truck for the ownerês business.	2		#N/A	#N/A	#N/A
How can I run a successful food truck?	85_7	How can I manage a Lamborghini successfully ?	In the beginning, God created heaven and earth and the Ferrari. And then he created Ferruccio Lamborghini, a man convinced he could have done a better job of just about all of it. Ferruccio is long gone, but Lamborghini management, under the watchful eye of Audi, carries the same conviction.	#N/A	0	How do you run a food truck well ?	1 Running a food truck is easy. 2 Youâll get rich running a food truck. 3 If you love to cook, you should open a food truck. Because youâve worked in a food truck, youâre ready to run the 1 show. Youâre going to become a celebrity chef. Food trucks compete unfairly with 1 restaurants. Food trucks donât pay 2 rent. Food trucks go only to trendy areas.	1		What factors influenced a pimped - out food truck 's success ?	Well, every visual aspect of your food truck businessâall the way from the font used in your logo to the colors that appear on your menu boardâcan have an impact on the way people perceive you. With that in mind, itâs essential to choose colors, fonts, and images that integrate with your brand identity.olor. Color is an integral part of your food truckâs design, and it can communicate som…	#N/A	1	How can I run a pimped - out food truck successfully ?	Running a food truck is easy. To run a food truck, you need to be on the streets six or seven days a week serving lunch and dinner, not to mention the need to be present at any food truck event that pops up. Owning a food truck means working a majority of your waking hours, especially at the start of your business.	3		39	FALSE	85_7_MARCO_584976	MARCO_584976	85_7_MARCO_5768031	MARCO_5768031	85_7_MARCO_6153990	MARCO_6153990		How can I run a successful food truck?	MARCO_5768036	85_7_MARCO_5768036	Running a food truck is easy. To run a food truck, you need to be on the streets six or seven days a week serving lunch and dinner, not to mention the need to be present at any food truck event that pops up. Owning a food truck means working a majority of your waking hours, especially at the start of your business.	3		#N/A	#N/A	#N/A
How can I run a successful food truck?	85_7	How can I manage a Lamborghini successfully ?	Horacio Pagani, who formerly managed Lamborghini 's composites, founded Pagani Composite Research in 1988. This new company worked with Lamborghini on numerous projects, including the restyling of the 25th Anniversary Countach, the Lamborghini LM002, the P140 design concept, and the Diablo.In the late 1980s, Pagani began designing his own car, then referred to as the C8 Project.Pagani planned to …	#N/A	0	How do you run a food truck well ?	Here are nine tips for potential food truck operators: 1 How to find your food truck. 2 You can get a food truck for as little as $25,000 and for as much as $125,000.3 But donât cut corners on your build, says Chris Johnston, owner and founder of Cheesie's Pub & Grub and food truck in Chicago.ere are nine tips for potential food truck operators: 1 How to find your food truck. 2 Secure a commiss…	2		What factors influenced a pimped - out food truck 's success ?	Food trucks fail for the same reason restaurants fail, lack of planning and finance. People have no idea how much hard work and how little pay there is. They tend to only look at the surface of a false glamorous profitable lifestyle.	#N/A	1	How can I run a pimped - out food truck successfully ?	1 How to find your food truck. 2 You can get a food truck for as little as $25,000 and for as much as $125,000. 3 But donât cut corners on your build, says Chris Johnston, owner and founder of Cheesie's Pub & Grub and food truck in Chicago. 4 Itâs the only chance you have to create an efficient mobile unit for your business.ere are nine tips for potential food truck operators: 1 How to find y…	2		39	FALSE	85_7_MARCO_8241525	MARCO_8241525	85_7_MARCO_8598009	MARCO_8598009	85_7_MARCO_6213687	MARCO_6213687		How can I run a successful food truck?	MARCO_8598008	85_7_MARCO_8598008	âFood trucks must face many barriers in order to break through and find success. These include overcoming a lack of physical location, meeting governmental regulations, finding a way to achieve operational efficiencies, and meeting the needs of mobile consumers.	2	3	#N/A	#N/A	#N/A
What are some good examples of successful food trucks to learn from?	85_8	What are the best examples of successful Lamborghini owners to emulate ?	One owner secretly records their reactions. 1 Allen Wong made millions after he created a phone app called Radio 5-0. 2 He subsequently bought a 2012 Lamborghini Aventador worth Â£260,000. 3 But he claims to have been heavily abused while driving the flash car. So he decided to make a video filming the reactions he received.	#N/A	0	What are the best examples of a successful food truck ?	GCG has become an example of "highly successful" food carts. Lonely Planet considers the GCG to be one of the top food carts of Portland. In 2009, the GCG won the People's Choice trophy at the Eat Mobile, Willamette Week's annual food cart contest.	3		What are some profitable cases to study for a pimped - out food truck ?	Food Truck Case Study â This is a case study with Anthony Salvagno that takes you through the full-process of starting a food truck in real time. Thereâs a full episode on how much was invested in the food truck. If you want a real-world example of how to start a food truck this series is it.	1		What are some good examples to learn from for a pimped - out food truck ?	Food Truck Case Study â This is a case study with Anthony Salvagno that takes you through the full-process of starting a food truck in real time. Thereâs a full episode on how much was invested in the food truck. If you want a real-world example of how to start a food truck this series is it.	1		40	TRUE	85_8_MARCO_4119304	MARCO_4119304	85_8_CAR_2d9953a5bd700cef7d28682e80ae42ef33d56f82	CAR_2d9953a5bd700cef7d28682e80ae42ef33d56f82	85_8_MARCO_1091420	MARCO_1091420		What are some good examples of successful food trucks to learn from?	MARCO_1091420	85_8_MARCO_1091420	Food Truck Case Study â This is a case study with Anthony Salvagno that takes you through the full-process of starting a food truck in real time. Thereâs a full episode on how much was invested in the food truck. If you want a real-world example of how to start a food truck this series is it.	1		#N/A	#N/A	#N/A
What are some good examples of successful food trucks to learn from?	85_8	What are the best examples of successful Lamborghini owners to emulate ?	Gautam Hari Singhania the Chairman & Managing Director of the Raymond Group. ref:- lamborghini owners in india. Prateek Madan real estate businessman. ref:- lamborghini owners in india. Views Â· View Upvotes.	#N/A	0	What are the best examples of a successful food truck ?	An Eat St. app for iPhone was released in 2011. It allows users to discover the food trucks in their area, as well as share tips and photos with others on their favourite street food destinations. The Eat St. app has been relaunched from its original version in a new and improved version 2.0. The app has been used by over 300,000 food lovers across North America, allowing them to weigh in on thei…	3		What are some profitable cases to study for a pimped - out food truck ?	Launch an Empire. Food Truck Empire is here to inspire and help you run a more profitable mobile food business. Enter Your Email To Receive Five Ways Successful Food Truck Owners Increase Profit (Without More Customers).	0		What are some good examples to learn from for a pimped - out food truck ?	The service is similar; the truck carries a stock of prepared foods that customers can buy. Ice cream vans are a familiar example of a catering truck in Canada, the United States and United Kingdom. A food truck or mobile kitchen is a modified van with a built-in barbecue grill, deep fryer, or other cooking equipment.	0		40	TRUE	85_8_MARCO_4119309	MARCO_4119309	85_8_CAR_8db2e3a7ec460617aa253e35571515043e47ac3a	CAR_8db2e3a7ec460617aa253e35571515043e47ac3a	85_8_MARCO_8460574	MARCO_8460574		What are some good examples of successful food trucks to learn from?	MARCO_1790525	85_8_MARCO_1790525	An Eat St. app for iPhone was released in 2011. It allows users to discover the food trucks in their area, as well as share tips and photos with others on their favourite street food destinations. The Eat St. app has been relaunched from its original version in a new and improved version 2.0. The app has been used by over 300,000 food lovers across North America, allowing them to weigh in on thei…	0		#N/A	#N/A	#N/A
What are some good examples of successful food trucks to learn from?	85_8	What are the best examples of successful Lamborghini owners to emulate ?	Before establishing his reputation as an artist, Patrick Mimran was active as a businessman. After Lamborghini went bankrupt in 1978, Mimran purchased the company with his brother Jean Claude. He served as CEO until 1987, engineering a successful turnaround and selling the company to Chrysler in 1987.	#N/A	0	What are the best examples of a successful food truck ?	The three drive the food truck across the country back to Los Angeles, serving top-quality Cuban sandwiches and yuca fries. Percy finds ways to promote the food truck on social media websites, and the truck becomes successful in New Orleans and Austin, Texas, where the daily specials include items made with local ingredients such as po' boys and barbecued brisket.	#N/A	1	What are some profitable cases to study for a pimped - out food truck ?	Research locations. With a food truck, you can travel to new locations and develop multiple customer bases. You should research prime selling spots, such as business parks, farmerâs markets or roaming food truck events. Zoning regulations and other restrictions may limit your options, however.	1		What are some good examples to learn from for a pimped - out food truck ?	Although food trucks are common at outdoor markets (For example, pizza trucks are common in Marseille and southern France since the 1960's), American-style trucks selling restaurant-quality food first appeared in Paris in 2012. Their owners needed to obtain permission from four separate government agencies, including the Prefecture of Police, but the trucks' offerings—including tacos and hamburge…	0		40	TRUE	85_8_CAR_5dd6a215338026fe4b07a68f4be7e8851f577787	CAR_5dd6a215338026fe4b07a68f4be7e8851f577787	85_8_CAR_8d575983dbb23ffd314c351e2b31558d0e08d52c	CAR_8d575983dbb23ffd314c351e2b31558d0e08d52c	85_8_MARCO_1490466	MARCO_1490466		What are some good examples of successful food trucks to learn from?	CAR_bbc444781a8d7a3d5c680d729a5bb664987f3c9a	85_8_CAR_bbc444781a8d7a3d5c680d729a5bb664987f3c9a	Basically owning a food truck is your life. Timothy from Flatiron Catering Group. The food truck world is just like a restaurant, itâs dog-eat-dog, and no one is going to help you figure it out. The way to succeed is to earn respect from your fellow food truckers. Paawan from The Chai Cart	0		#N/A	#N/A	#N/A
Besides inventive flavors, what made Kogi successful?	85_9	How did Lamborghini become such an amazing success ? Were just the flavors ?	Spurred on by his success in tractors, Ferruccio Lamborghini decided to start building exclusive luxury cars, and so the GT 400 Lamborghini e came out in 1962, followed by the MIURA in 1964.	0		What makes a food truck so different , excluding innovative dishes ?	Food carts are different from food trucks because they do not travel under their own power. Some food carts are towed by another vehicle, while some alternatively are pushed by a human or animal or bicycle.	#N/A	0	Besides the food , what made a pimped - out food truck so successful ?	A modern-day food truck isn't just an ordinary taco truck one might find at a construction site. In 2009, New York magazine noted that the food truck had "largely transcended its roach-coach classification and is now a respectable venue for aspiring chefs to launch careers." These gourmet trucks' menus run the gamut of ethnic and fusion cuisine. Often focusing on limited but creative dishes at re…	0		Besides inventive flavors , what made a food truck successful ?	Some vendors operate out of food trucks and food carts, which offer a low overhead for entrepreneurs and often serve a huge variety of cuisines. Like restaurants, they are regulated and subject to inspections by local municipal or county health departments. Food trucks surged in popularity after the success of the Korean–Mexican fusion truck Kogi Korean BBQ in Los Angeles in 2009. According to Sm…	0		41	FALSE	85_9_CAR_5fa406c1a9e09217d9d1360fc4ff8835106d977f	CAR_5fa406c1a9e09217d9d1360fc4ff8835106d977f	85_9_CAR_c698eb686faffdc90ac3350e8e37b9d242e446be	CAR_c698eb686faffdc90ac3350e8e37b9d242e446be	85_9_CAR_847f5f133e932d11811a87814c9040bb685fee74	CAR_847f5f133e932d11811a87814c9040bb685fee74		Besides inventive flavors, what made Kogi successful?	CAR_b883f1a3da907f244282172cfdbd01f3e3905d0e	85_9_CAR_b883f1a3da907f244282172cfdbd01f3e3905d0e	The attraction, however, depends only partly on the flavors. Media accounts emphasize the social aspect of eating at the ever-mobile Kogi. According to the New York Times, "The truck and its staff of merry makers have become a sort of roving party, bringing people to neighborhoods they might not normally go to, and allowing for interactions with strangers they might not otherwise talk to."	0		#N/A	#N/A	#N/A
Besides inventive flavors, what made Kogi successful?	85_9	How did Lamborghini become such an amazing success ? Were just the flavors ?	Based on the initial success of the Carioca, Lamborghini founded Lamborghini Trattori and began manufacturing tractors.	0		What makes a food truck so different , excluding innovative dishes ?	All food is prepared and cooked to order by the staff on the truck. Excepting their signature dishes, the menu remains flexible and rotates depending on its location. Additionally, the truck offers several secret off-menu items.	#N/A	1	Besides the food , what made a pimped - out food truck so successful ?	Some vendors operate out of food trucks and food carts, which offer a low overhead for entrepreneurs and often serve a huge variety of cuisines. Like restaurants, they are regulated and subject to inspections by local municipal or county health departments. Food trucks surged in popularity after the success of the Korean–Mexican fusion truck Kogi Korean BBQ in Los Angeles in 2009. According to Sm…	0		Besides inventive flavors , what made a food truck successful ?	Tracking food trucks has been made easy with social media like Facebook and Twitter, where a favorite gourmet truck can be located at any moment, with updates on specials, new menu items and location changes. In fact, it could be argued that social media was the biggest contributing factor to the breakthrough success of the gourmet food truck. In addition to social media, there are a number of fo…	4		41	FALSE	85_9_CAR_c564ff6a45cb38cd0635b6a0511f3ea0c7cb6341	CAR_c564ff6a45cb38cd0635b6a0511f3ea0c7cb6341	85_9_CAR_e1714357e688debb6f24f02dc465654e6b36cae3	CAR_e1714357e688debb6f24f02dc465654e6b36cae3	85_9_CAR_b883f1a3da907f244282172cfdbd01f3e3905d0e	CAR_b883f1a3da907f244282172cfdbd01f3e3905d0e		Besides inventive flavors, what made Kogi successful?	CAR_99a90e94458f757d9e662bbefa3a536d91be43de	85_9_CAR_99a90e94458f757d9e662bbefa3a536d91be43de	Some vendors operate out of food trucks and food carts, which offer a low overhead for entrepreneurs and often serve a huge variety of cuisines. Like restaurants, they are regulated and subject to inspections by local municipal or county health departments. Food trucks surged in popularity after the success of the Korean–Mexican fusion truck Kogi Korean BBQ in Los Angeles in 2009. According to Sm…	4		#N/A	#N/A	#N/A
Besides inventive flavors, what made Kogi successful?	85_9	How did Lamborghini become such an amazing success ? Were just the flavors ?	Ferruccio Elio Arturo Lamborghini (; April 28, 1916 – February 20, 1993) was an Italian industrialist. Born to grape farmers from the comune of Cento in the Emilia-Romagna region, his mechanical know-how led him to enter the business of tractor manufacturing in 1948, when he founded Lamborghini Trattori, which quickly became an important manufacturer of agricultural equipment in the midst of Ital…	#N/A	0	What makes a food truck so different , excluding innovative dishes ?	A modern-day food truck isn't just an ordinary taco truck one might find at a construction site. In 2009, New York magazine noted that the food truck had "largely transcended its roach-coach classification and is now a respectable venue for aspiring chefs to launch careers." These gourmet trucks' menus run the gamut of ethnic and fusion cuisine. Often focusing on limited but creative dishes at re…	0		Besides the food , what made a pimped - out food truck so successful ?	Many food truck owners have found that their sales increase when they sell in a food truck park or at an event attended by other food trucks because people are more likely to buy one thing from each truck so that they can sample everything.	0		Besides inventive flavors , what made a food truck successful ?	âFood trucks must face many barriers in order to break through and find success. These include overcoming a lack of physical location, meeting governmental regulations, finding a way to achieve operational efficiencies, and meeting the needs of mobile consumers.	0		41	FALSE	85_9_CAR_0a10fa34e219e7bb08568e2183947cfd405c9ca8	CAR_0a10fa34e219e7bb08568e2183947cfd405c9ca8	85_9_CAR_847f5f133e932d11811a87814c9040bb685fee74	CAR_847f5f133e932d11811a87814c9040bb685fee74	85_9_MARCO_7437390	MARCO_7437390		Besides inventive flavors, what made Kogi successful?	MARCO_3633611	85_9_MARCO_3633611	Kogi's first "big break" came when it got the idea outside of Green Door in Hollywood to contact food bloggers about trying the tacos who then wrote about Kogi. Its subsequent use of Twitter to announce its location led to considerable buzz on social networking services, leading Newsweek to proclaim Kogi "America's first viral eatery".	0		#N/A	#N/A	#N/A
What is the climate like in Utah?	86_1	What is the weather like in Utah ?	On average, Utah weather is quite temperate. Utah is a semiarid state with dry, high country air and plenty of sunshine. Generally speaking, Utah is best experienced with an extra bottle of water and some sunscreen.	2		What type of weather is in Utah ?	On average, Utah weather is quite temperate. Utah is a semiarid state with dry, high country air and plenty of sunshine. Generally speaking, Utah is best experienced with an extra bottle of water and some sunscreen.	2		What weather is Utah known for ?	On average, Utah weather is quite temperate. Utah is a semiarid state with dry, high country air and plenty of sunshine. Generally speaking, Utah is best experienced with an extra bottle of water and some sunscreen.	2		What is the climate like in Utah ?	Utah-Climate. The climate of Utah is generally semiarid to arid. Temperatures are favorable along the Wasatch Front, where there are relatively mild winters. At Salt Lake City, the normal daily mean temperature is 52Â°F (11Â°C), ranging from 28Â°F (â2Â°C) in January to 78Â°F (26Â°C) in July. The record high temperature, 117Â°F (47Â°C), was set at St. George on 5 July 1985; the record low temper…	2		42	TRUE	86_1_MARCO_4846168	MARCO_4846168	86_1_MARCO_4846168	MARCO_4846168	86_1_MARCO_4846168	MARCO_4846168		What is the climate like in Utah?	MARCO_3989944	86_1_MARCO_3989944	Utah-Climate. The climate of Utah is generally semiarid to arid. Temperatures are favorable along the Wasatch Front, where there are relatively mild winters. At Salt Lake City, the normal daily mean temperature is 52Â°F (11Â°C), ranging from 28Â°F (â2Â°C) in January to 78Â°F (26Â°C) in July. The record high temperature, 117Â°F (47Â°C), was set at St. George on 5 July 1985; the record low temper…	2		#N/A	#N/A	#N/A
What is the climate like in Utah?	86_1	What is the weather like in Utah ?	On average, Utah weather is quite temperate. Utah is a semiarid state with dry, high country air and plenty of sunshine. Generally speaking, Utah is best experienced with an extra bottle of water and some sunscreen. Stay hydrated and avoid altitude sickness.	2		What type of weather is in Utah ?	On average, Utah weather is quite temperate. Utah is a semiarid state with dry, high country air and plenty of sunshine. Generally speaking, Utah is best experienced with an extra bottle of water and some sunscreen. Stay hydrated and avoid altitude sickness.	2		What weather is Utah known for ?	On average, Utah weather is quite temperate. Utah is a semiarid state with dry, high country air and plenty of sunshine. Generally speaking, Utah is best experienced with an extra bottle of water and some sunscreen. Stay hydrated and avoid altitude sickness.	2		What is the climate like in Utah ?	Utah features a dry, semi-arid to desert climate, although its many mountains feature a large variety of climates, with the highest points in the Uinta Mountains being above the timberline. The dry weather is a result of the state's location in the rain shadow of the Sierra Nevada in California. The eastern half of the state lies in the rain shadow of the Wasatch Mountains. The primary source of …	3		42	TRUE	86_1_MARCO_2306242	MARCO_2306242	86_1_MARCO_2306242	MARCO_2306242	86_1_MARCO_2306242	MARCO_2306242		What is the climate like in Utah?	CAR_01ce0134d5848f3eb854adfb79151ff392045a38	86_1_CAR_01ce0134d5848f3eb854adfb79151ff392045a38	Utah features a dry, semi-arid to desert climate, although its many mountains feature a large variety of climates, with the highest points in the Uinta Mountains being above the timberline. The dry weather is a result of the state's location in the rain shadow of the Sierra Nevada in California. The eastern half of the state lies in the rain shadow of the Wasatch Mountains. The primary source of …	3		#N/A	#N/A	#N/A
What is the climate like in Utah?	86_1	What is the weather like in Utah ?	On average, Utah weather is quite temperate. Utah is a semiarid state with dry, high country air and plenty of sunshine. Generally speaking, Utah is best experienced with an extra bottle of water and some sunscreen. Stay hydrated and avoid altitude sickness. Your Indiana Jones adventure hat will be right at home at here as well. Should I Bring a Coat?	2		What type of weather is in Utah ?	On average, Utah weather is quite temperate. Utah is a semiarid state with dry, high country air and plenty of sunshine. Generally speaking, Utah is best experienced with an extra bottle of water and some sunscreen. Stay hydrated and avoid altitude sickness. Your Indiana Jones adventure hat will be right at home at here as well. Should I Bring a Coat?	2		What weather is Utah known for ?	Utah Weather. There's a saying here in Utah: If you don't like the weather, wait five minutes.. Our weather is as varied as our terrain. Some of our mountains receive over 500 inches of snow in the winter. In the summer, parts of the state can reach temperatures well over 100Â°F.	3		What is the climate like in Utah ?	Climate for Salt Lake City, Utah. Salt Lake City's coldest month is January when the average temperature overnight is 21.3Â°F. In July, the warmest month, the average day time temperature rises to 90.6Â°F. The driest month in Salt Lake City is July with 0.72 inches of precipitation, and with 2.09 inches May is the wettest month.	1		42	TRUE	86_1_MARCO_1685132	MARCO_1685132	86_1_MARCO_1685132	MARCO_1685132	86_1_MARCO_2811738	MARCO_2811738		What is the climate like in Utah?	MARCO_7234298	86_1_MARCO_7234298	While Utah is widely perceived to be a desert state, and statistically it is the second driest state in the nation, its climate, soils, and vegetation are as diverse as are its landforms. Utah has three climatic regions--humid, sub-humid or semi-arid, and arid--and each region covers about one-third of the state. The high mountains and plateaus are humid; the lower basins, valleys, and flatlands …	1		#N/A	#N/A	#N/A
How does the climate of Salt Lake City differ from Utah overall?	86_2	Why is the climate in Salt Lake City so special ?	The climate of Salt Lake City varies widely. Lying in the Salt Lake Valley, the city is surrounded by mountains and the Great Salt Lake. The city has four distinct seasons: a cold, snowy winter; a hot, dry summer; and two comfortable, relatively wet transition periods.The climate of the Salt Lake City area is generally subhumid, not semi-arid as often claimed.owever, the average sub-zero days in …	0		What makes Salt Lake City 's climate special ?	The climate of Salt Lake City varies widely. Lying in the Salt Lake Valley, the city is surrounded by mountains and the Great Salt Lake. The city has four distinct seasons: a cold, snowy winter; a hot, dry summer; and two relatively wet transition periods. The climate of the Salt Lake City area is generally subhumid, not semi-arid as often claimed. Under the KÃ¶ppen climate classification, Salt L…	0		Is Salt Lake City weather any different from other cities in Utah ?	Salt Lake City Weather. The weather in Salt Lake City, Utah is ideal for recreation in each of the four seasons. Ample snow in the winter make it a top destination for skiers from all over the world. Mild falls and springs are perfect for hiking, biking, fishing and more.	0		How does Salt Lake City differ from other cities in Utah ?	Salt Lake City is the cultural and political center of Utah. With a metro area of 1 million residents, Salt Lake is Utah's most populous city by a significant amount, yet remains remarkably pleasant and livable.	0		43	FALSE	86_2_MARCO_158598	MARCO_158598	86_2_MARCO_4888968	MARCO_4888968	86_2_MARCO_315217	MARCO_315217		How does the climate of Salt Lake City differ from Utah overall?	MARCO_7770830	86_2_MARCO_7770830	Utah-Climate. The climate of Utah is generally semiarid to arid. Temperatures are favorable along the Wasatch Front, where there are relatively mild winters. At Salt Lake City, the normal daily mean temperature is 52Â°F (11Â°C), ranging from 28Â°F (â2Â°C) in January to 78Â°F (26Â°C) in July. The record high temperature, 117Â°F (47Â°C), was set at St. George on 5 July 1985; the record low temper…	0		#N/A	#N/A	#N/A
How does the climate of Salt Lake City differ from Utah overall?	86_2	Why is the climate in Salt Lake City so special ?	The city has four distinct seasons: a cold, snowy winter; a hot, dry summer; and two relatively wet transition periods. The climate of the Salt Lake City area is generally subhumid, not semi-arid as often claimed. Under the Köppen climate classification, Salt Lake City has a hot-summer humid continental climate (Dfa), with relatively drier summers than the rest of the year. The Pacific Ocean is t…	0		What makes Salt Lake City 's climate special ?	Under the KÃ¶ppen climate classification, Salt Lake City has a hot-summer humid continental climate (Dfa), with relatively drier summers than the rest of the year. The Pacific Ocean is the primary influence on the weather, contributing storms from about October to May, with spring being the wettest season.	0		Is Salt Lake City weather any different from other cities in Utah ?	The climate of Salt Lake City varies widely. Lying in the Salt Lake Valley, the city is surrounded by mountains and the Great Salt Lake. The city has four distinct seasons: a cold, snowy winter; a hot, dry summer; and two relatively wet transition periods. The climate of the Salt Lake City area is generally subhumid, not semi-arid as often claimed.	0		How does Salt Lake City differ from other cities in Utah ?	Salt Lake City, Utah, Information. Salt Lake combines the amenities of a major metropolitan area with the friendliness of a small, western city. Hosting the Olympic Winter Games of 2002 enhanced the community's profile as a world-class travel destination, while showcasing Salt Lake as an unspoiled, family-friendly destination.	0		43	FALSE	86_2_CAR_5c03b15e90bdf11d9f6479c735f8d4628c430072	CAR_5c03b15e90bdf11d9f6479c735f8d4628c430072	86_2_MARCO_4080103	MARCO_4080103	86_2_MARCO_4589245	MARCO_4589245		How does the climate of Salt Lake City differ from Utah overall?	MARCO_5242497	86_2_MARCO_5242497	Climate of Salt Lake City. The climate of Salt Lake City varies widely. Lying in the Salt Lake Valley, the city is surrounded by mountains and the Great Salt Lake. The city has four distinct seasons: a cold, snowy winter; a hot, dry summer; and two relatively wet transition periods. The climate of the Salt Lake City area is generally subhumid, not semi-arid as often claimed.	0		#N/A	#N/A	#N/A
How does the climate of Salt Lake City differ from Utah overall?	86_2	Why is the climate in Salt Lake City so special ?	Climate of Salt Lake City. The climate of Salt Lake City varies widely. Lying in the Salt Lake Valley, the city is surrounded by mountains and the Great Salt Lake. The city has four distinct seasons: a cold, snowy winter; a hot, dry summer; and two relatively wet transition periods. The climate of the Salt Lake City area is generally subhumid, not semi-arid as often claimed.	0		What makes Salt Lake City 's climate special ?	The city has four distinct seasons: a cold, snowy winter; a hot, dry summer; and two relatively wet transition periods. The climate of the Salt Lake City area is generally subhumid, not semi-arid as often claimed. Under the Köppen climate classification, Salt Lake City has a hot-summer humid continental climate (Dfa), with relatively drier summers than the rest of the year. The Pacific Ocean is t…	0		Is Salt Lake City weather any different from other cities in Utah ?	The climate of Salt Lake City varies widely. Lying in the Salt Lake Valley, the city is surrounded by mountains and the Great Salt Lake. The city has four distinct seasons: a cold, snowy winter; a hot, dry summer; and two relatively wet transition periods. The climate of the Salt Lake City area is generally subhumid, not semi-arid as often claimed. Under the KÃ¶ppen climate classification, Salt L…	0		How does Salt Lake City differ from other cities in Utah ?	Salt Lake City is the largest retail and wholesale market in Utah, and the city supports a thriving tourism industry. The construction industry remains significant. Salt Lake City is the international headquarters of the Church of Jesus Christ of Latter-day Saints.	0		43	FALSE	86_2_MARCO_4705480	MARCO_4705480	86_2_CAR_5c03b15e90bdf11d9f6479c735f8d4628c430072	CAR_5c03b15e90bdf11d9f6479c735f8d4628c430072	86_2_MARCO_4888968	MARCO_4888968		How does the climate of Salt Lake City differ from Utah overall?	MARCO_6074717	86_2_MARCO_6074717	The climate of Salt Lake City varies widely. Lying in the Salt Lake Valley, the city is surrounded by mountains and the Great Salt Lake. The city has four distinct seasons: a cold, snowy winter; a hot, dry summer; and two relatively wet transition periods. The climate of the Salt Lake City area is generally subhumid, not semi-arid as often claimed. Under the KÃ¶ppen climate classification, Salt L…	0		#N/A	#N/A	#N/A
What is the main economic activity of Salt Lake City?	86_3	What are the daily business activities in Salt Lake City ?	Utah's location is very enticing to both companies and employees. With the Rocky Mountains very close, many activities are available year-round. Four distinct seasons offer year round activities including skiing, hiking, and rock climbing. Utah also has many national parks including Zions National Park, Bryce Canyon National Park, Canyonlands National Park. Salt Lake City is a Delta Airlines hub …	0		How does Salt Lake City make money ?	Salt Lake City, UT Salary. Salt Lake City, UT average salary is $71,754, median salary is $65,994 with a salary range from $20,176 to $675,000. Salt Lake City, UT salaries are collected from government agencies and companies. Each salary is associated with a real job position.	#N/A	0	What is Utah 's economy like ?	Area: 764 square miles. Population. County Seat: Salt Lake City (also the state capital) Where it got its name: named for the Great Salt Lake. Main cities and towns: Salt Lake City, West Valley City, Sandy, West Jordan, Murray. Economy: government, trade, manufacturing, services, transportation and communications, finance, mining, construction, tourism, agriculture.	1		What is Salt Lake City 's main economic activity ?	Salt Lake City was originally a farming community; it also depended on mining until the early 1980s when foreign competition began to erode profits from that industry. Today it has grown into a diverse economic region.	0		44	TRUE	86_3_CAR_3032f9961ad90d27775f4318bc7d928f741e3c58	CAR_3032f9961ad90d27775f4318bc7d928f741e3c58	86_3_MARCO_3076275	MARCO_3076275	86_3_MARCO_8366393	MARCO_8366393		What is the main economic activity of Salt Lake City?	MARCO_6074719	86_3_MARCO_6074719	Salt Lake City is the largest retail and wholesale market in Utah, and the city supports a thriving tourism industry. The construction industry remains significant. Salt Lake City is the international headquarters of the Church of Jesus Christ of Latter-day Saints.	0		#N/A	0	#N/A
What is the main economic activity of Salt Lake City?	86_3	What are the daily business activities in Salt Lake City ?	Tours/Activities. Free tours located in downtown Salt Lake City on the Historic Thirty Five Acres of Temple Square, are a must see in Utah and your visit to Salt Lake City. Small groups or families need not reserve tours, as Temple Square is open from 9 a.m. to 9 p.m. daily and tours can be hosted as you arrive.	#N/A	0	How does Salt Lake City make money ?	Salt Lake City is the largest retail and wholesale market in Utah, and the city supports a thriving tourism industry. The construction industry remains significant. Salt Lake City is the international headquarters of the Church of Jesus Christ of Latter-day Saints.	2		What is Utah 's economy like ?	The service sector produces the most jobs in the city, especially computer and health care services. Government employment is considerable, with the State of Utah, University of Utah, and Salt Lake County among the city's top employers. A number of national financial institutions have established branch offices in Salt Lake City, making it the center of banking and finance for the region.	2		What is Salt Lake City 's main economic activity ?	Salt Lake City is the largest retail and wholesale market in Utah, and the city supports a thriving tourism industry. The construction industry remains significant. Salt Lake City is the international headquarters of the Church of Jesus Christ of Latter-day Saints.	2		44	TRUE	86_3_MARCO_320548	MARCO_320548	86_3_MARCO_6074717	MARCO_6074717	86_3_MARCO_6074723	MARCO_6074723		What is the main economic activity of Salt Lake City?	MARCO_6074717	86_3_MARCO_6074717	Salt Lake City was originally a farming community; it also depended on mining until the early 1980s when foreign competition began to erode profits from that industry. Today it has grown into a diverse economic region.	2		0	#N/A	#N/A							0
What is the main economic activity of Salt Lake City?	86_3	What are the daily business activities in Salt Lake City ?	Historically known as the "Crossroads of the West" for its railroads, when nearby steel, mining and railroad operations provided a strong source of income with Silver King Coalition Mines, Geneva Steel, Bingham Canyon Mine, and oil refineries, Salt Lake City's modern economy is service-oriented. Today the city's major sectors are government, trade, transportation, utilities, and professional and …	3		How does Salt Lake City make money ?	The service sector produces the most jobs in the city, especially computer and health care services. Government employment is considerable, with the State of Utah, University of Utah, and Salt Lake County among the city's top employers. A number of national financial institutions have established branch offices in Salt Lake City, making it the center of banking and finance for the region.	2		What is Utah 's economy like ?	Salt Lake City is the largest retail and wholesale market in Utah, and the city supports a thriving tourism industry. The construction industry remains significant. Salt Lake City is the international headquarters of the Church of Jesus Christ of Latter-day Saints.	2		What is Salt Lake City 's main economic activity ?	Tourism is the main economic activity of the city although it has also become the regional hub for shopping, medical care, banking, etc.	0		44	TRUE	86_3_CAR_d23170c4239a4779abb475016eebcb919c4fd5ba	CAR_d23170c4239a4779abb475016eebcb919c4fd5ba	86_3_MARCO_6074723	MARCO_6074723	86_3_MARCO_6074717	MARCO_6074717		What is the main economic activity of Salt Lake City?	CAR_34f6658d45f8b70858a2e2d3ac14be0615fb3a67	86_3_CAR_34f6658d45f8b70858a2e2d3ac14be0615fb3a67	In eastern Utah petroleum production is a major industry. Near Salt Lake City, petroleum refining is done by a number of oil companies. In central Utah, coal production accounts for much of the mining activity.	0		#N/A	#N/A	#N/A
What was the impact of the 2002 olympic winter games on the economy of Salt Lake City?	86_4	How did Salt Lake City get affected after the Olympics ?	Salt Lake City was selected to host the 2002 Winter Olympics in 1995. The games were plagued with controversy. A bid scandal surfaced in 1998 alleging bribes had been offered to secure the city for the 2002 games location. During the games, other scandals erupted over contested judging scores and illegal drug use. Despite the controversies, the games were heralded as a financial success, being on…	3		What are the benefits of the 2002 Olympics in Salt Lake City ?	The 2002 Olympic Games also benefited the university economically since the Salt Lake 2002 Olympic Cauldron Park was elevated by the renovations that took place. Ice rinks were very scarce in Utah, but due to the Olympic Games, they became plentiful and offered several entertainment and training opportunities for hockey players and figure skaters. The Cauldron Park located at the University of Ut…	1		What effects do the 2002 Games have on Utah 's economy ?	Salt Lake City's 2002 Winter Olympics led to an economic boom for Utah's ski industry. Skier visits rose 42% from 2002-2011 including a 70% growth in out-of-state skiers from 2002-2011.<ref>Lee, Jason. "Economic Impact of 2002 Olympics Still Felt | KSL.com." Economic Impact of 2002 Olympics Still Felt | KSL.com. KSL, 8 Feb. 2012. Web. 22 Apr. 2015.	3		What was the impact of the 2002 games on Salt Lake City ?	Salt Lake City's 2002 Winter Olympics led to an economic boom for Utah's ski industry. Skier visits rose 42% from 2002-2011 including a 70% growth in out-of-state skiers from 2002-2011.<ref>Lee, Jason. "Economic Impact of 2002 Olympics Still Felt | KSL.com." Economic Impact of 2002 Olympics Still Felt | KSL.com. KSL, 8 Feb. 2012. Web. 22 Apr. 2015.	3		45	FALSE	86_4_CAR_d7615a178634d3633d60356f34a7539a41109370	CAR_d7615a178634d3633d60356f34a7539a41109370	86_4_CAR_51164241adeb889e0ff6f1c99c802a5a48ee6f9e	CAR_51164241adeb889e0ff6f1c99c802a5a48ee6f9e	86_4_CAR_85a400316f0e7e7a611d5ee779bbdd890df08e82	CAR_85a400316f0e7e7a611d5ee779bbdd890df08e82		What was the impact of the 2002 olympic winter games on the economy of Salt Lake City?	CAR_85a400316f0e7e7a611d5ee779bbdd890df08e82	86_4_CAR_85a400316f0e7e7a611d5ee779bbdd890df08e82	Salt Lake City's 2002 Winter Olympics led to an economic boom for Utah's ski industry. Skier visits rose 42% from 2002-2011 including a 70% growth in out-of-state skiers from 2002-2011.<ref>Lee, Jason. "Economic Impact of 2002 Olympics Still Felt | KSL.com." Economic Impact of 2002 Olympics Still Felt | KSL.com. KSL, 8 Feb. 2012. Web. 22 Apr. 2015.	3		#N/A	#N/A	#N/A
What was the impact of the 2002 olympic winter games on the economy of Salt Lake City?	86_4	How did Salt Lake City get affected after the Olympics ?	After Salt Lake City was awarded the 2002 Winter Olympics in 1995 it soon became obvious that Rice Stadium was not adequate to be the main stadium. With this in mind, the athletic department decided to completely overhaul the facility to bring it up to modern standards. After the 1997 season, virtually all of the old stadium was demolished to make way for Rice–Eccles Stadium. All that remains of …	#N/A	0	What are the benefits of the 2002 Olympics in Salt Lake City ?	Salt Lake City's 2002 Winter Olympics led to an economic boom for Utah's ski industry. Skier visits rose 42% from 2002-2011 including a 70% growth in out-of-state skiers from 2002-2011.<ref>Lee, Jason. "Economic Impact of 2002 Olympics Still Felt | KSL.com." Economic Impact of 2002 Olympics Still Felt | KSL.com. KSL, 8 Feb. 2012. Web. 22 Apr. 2015.	3		What effects do the 2002 Games have on Utah 's economy ?	The 2002 Olympic Games also benefited the university economically since the Salt Lake 2002 Olympic Cauldron Park was elevated by the renovations that took place. Ice rinks were very scarce in Utah, but due to the Olympic Games, they became plentiful and offered several entertainment and training opportunities for hockey players and figure skaters. The Cauldron Park located at the University of Ut…	1		What was the impact of the 2002 games on Salt Lake City ?	Salt Lake City was host to the 2002 Winter Olympics. At the time of the 2002 Olympics, Salt Lake City was the most populated area to hold a Winter Olympic Games. The event put Salt Lake City in the international spotlight and is regarded by many as one of the most successful Winter Olympics ever.	0		45	FALSE	86_4_CAR_43f648aa8c7ab7d004025f615f68f75596173fea	CAR_43f648aa8c7ab7d004025f615f68f75596173fea	86_4_CAR_85a400316f0e7e7a611d5ee779bbdd890df08e82	CAR_85a400316f0e7e7a611d5ee779bbdd890df08e82	86_4_CAR_51164241adeb889e0ff6f1c99c802a5a48ee6f9e	CAR_51164241adeb889e0ff6f1c99c802a5a48ee6f9e		What was the impact of the 2002 olympic winter games on the economy of Salt Lake City?	CAR_f3b7a443e934fdde49cef3aa6f351c30cf67bc8d	86_4_CAR_f3b7a443e934fdde49cef3aa6f351c30cf67bc8d	The economy of Salt Lake City, Utah is primarily service-oriented. While nearby Bingham Canyon Mine (the world's largest open-pit mine) provided a strong source of income during the 19th century, the city has evolved to an economy built on transit hubs, call centers, and seasonal tourism. The 2002 Olympic Winter Games gave a great boost to the area's economy. Many hotels and restaurants were buil…	0		#N/A	#N/A	#N/A
What was the impact of the 2002 olympic winter games on the economy of Salt Lake City?	86_4	How did Salt Lake City get affected after the Olympics ?	Terrorism affected the last two Olympic Games held in the United States. During the Summer Olympics in 1996 in Atlanta, Georgia, a bomb was detonated at the Centennial Olympic Park, which killed two and injured 111 others. The bomb was set by Eric Rudolph, an American domestic terrorist, who is currently serving a life sentence for the bombing. The 2002 Winter Olympics in Salt Lake City, Utah, to…	0		What are the benefits of the 2002 Olympics in Salt Lake City ?	Salt Lake City hosted the 2002 Winter Olympics. After early financial struggles and scandal, the 2002 Olympics eventually became among the most successful Winter Olympics in history from a marketing and financial standpoint. Watched by over 2 billion viewers, the Games ended up with a profit of $40 million.	0		What effects do the 2002 Games have on Utah 's economy ?	The economy of Salt Lake City, Utah is primarily service-oriented. While nearby Bingham Canyon Mine (the world's largest open-pit mine) provided a strong source of income during the 19th century, the city has evolved to an economy built on transit hubs, call centers, and seasonal tourism. The 2002 Olympic Winter Games gave a great boost to the area's economy. Many hotels and restaurants were buil…	3		What was the impact of the 2002 games on Salt Lake City ?	Salt Lake City was selected to host the 2002 Winter Olympics in 1995. The games were plagued with controversy. A bid scandal surfaced in 1998 alleging bribes had been offered to secure the city for the 2002 games location. During the games, other scandals erupted over contested judging scores and illegal drug use. Despite the controversies, the games were heralded as a financial success, being on…	3		45	FALSE	86_4_CAR_f1da65ab75d5b41d6bb7d6ed7c376c7b8a21b0fe	CAR_f1da65ab75d5b41d6bb7d6ed7c376c7b8a21b0fe	86_4_CAR_668a93d7ccba8a64556be498db111cdaf8d4fd87	CAR_668a93d7ccba8a64556be498db111cdaf8d4fd87	86_4_CAR_717b11440aba32158dba995d76fb5c6a4a9b5ccb	CAR_717b11440aba32158dba995d76fb5c6a4a9b5ccb		What was the impact of the 2002 olympic winter games on the economy of Salt Lake City?	CAR_d7615a178634d3633d60356f34a7539a41109370	86_4_CAR_d7615a178634d3633d60356f34a7539a41109370	Salt Lake City hosted the 2002 Winter Olympics. After early financial struggles and scandal, the 2002 Olympics eventually became among the most successful Winter Olympics in history from a marketing and financial standpoint. Watched by over 2 billion viewers, the Games ended up with a profit of $40 million.	3		#N/A	#N/A	#N/A
What were important ski locations used in the 2002 olympic winter games?	86_5	Where did the ski sports take place in Utah ?	The 2014 NCAA Skiing Championships were held in Park City, Utah and Midway, Utah on March 5–8, 2014. Utah hosted the event with alpine events at Park City Ski Resort and Nordic events taking place at Soldier Hollow in nearby Midway, UT. Utah hosted for the fourth time, all have happened in Park City, the other times being 1981, 1991 and 2000.	0		What were the most important ski locations for the 2002 Winter Olympics in Utah ?	Alpine skiing at the 2002 Winter Olympics consisted of ten events held near Salt Lake City, Utah, United States. The downhill, super-G and combined events were held at Snowbasin, the giant slalom at Park City, and the slalom at Deer Valley. The ten events took place 10–23 February 2002.	4		What were some of the famous ski resorts used for the 2002 Winter Olympics ?	Soldier Hollow is a cross-country ski resort located southeast of Salt Lake City in Wasatch Mountain State Park, Utah, United States. The resort was created for the 2002 Winter Olympics, and during the games it hosted the biathlon, cross-country skiing and the cross country skiing portion of the Nordic combined events. Since hosting the Olympics, it has been developed as a cross-country skiing, t…	2		What were important ski locations used for the 2002 games in Utah ?	The Utah Olympic Park is a winter sports park built for the 2002 Winter Olympics, and is located east of Salt Lake City near Park City, Utah, United States. During the 2002 games the park hosted the bobsleigh, skeleton, luge, ski jumping, and Nordic combined events. It still serves a training center for Olympic and development level athletes. Other facilities in addition to the ski jumps and bobs…	2		46	TRUE	86_5_CAR_5b04717555b31a88f3f20c0b2cbbca3a0f93a3bd	CAR_5b04717555b31a88f3f20c0b2cbbca3a0f93a3bd	86_5_CAR_9d1c4bfe75b0ebbd5274778abcb344b9fea4618d	CAR_9d1c4bfe75b0ebbd5274778abcb344b9fea4618d	86_5_CAR_1bbf5d444d33830a9fba3e166b2ac7783c902944	CAR_1bbf5d444d33830a9fba3e166b2ac7783c902944		What were important ski locations used in the 2002 olympic winter games?	CAR_93048ade533bb9963ee2c2cb0d5e568fcd838daa	86_5_CAR_93048ade533bb9963ee2c2cb0d5e568fcd838daa	Alpine skiing at the 2002 Winter Olympics consisted of ten events held near Salt Lake City, Utah, United States. The downhill, super-G and combined events were held at Snowbasin, the giant slalom at Park City, and the slalom at Deer Valley. The ten events took place 10–23 February 2002.	2		#N/A	#N/A	#N/A
What were important ski locations used in the 2002 olympic winter games?	86_5	Where did the ski sports take place in Utah ?	The 2003 FIS Freestyle World Ski Championships were held between January 31 and February 2 at the Deer Valley ski resort in northern Utah near Park City, United States. The World Championships featured both men's and women's events in the Moguls, Aerials and Dual Moguls.	#N/A	0	What were the most important ski locations for the 2002 Winter Olympics in Utah ?	The Utah Olympic Park is a winter sports park built for the 2002 Winter Olympics, and is located east of Salt Lake City near Park City, Utah, United States. During the 2002 games the park hosted the bobsleigh, skeleton, luge, ski jumping, and Nordic combined events. It still serves a training center for Olympic and development level athletes. Other facilities in addition to the ski jumps and bobs…	2		What were some of the famous ski resorts used for the 2002 Winter Olympics ?	Beginning in 1939, with the establishment of Alta Ski Area, Utah has become world-renowned for its skiing. The dry, powdery snow of the Wasatch Range is considered some of the best skiing in the world. Salt Lake City won the bid for the 2002 Winter Olympics in 1995, and this has served as a great boost to the economy. The ski resorts have increased in popularity, and many of the Olympic venues sc…	0		What were important ski locations used for the 2002 games in Utah ?	Soldier Hollow is a cross-country ski resort located southeast of Salt Lake City in Wasatch Mountain State Park, Utah, United States. The resort was created for the 2002 Winter Olympics, and during the games it hosted the biathlon, cross-country skiing and the cross country skiing portion of the Nordic combined events. Since hosting the Olympics, it has been developed as a cross-country skiing, t…	2		46	TRUE	86_5_CAR_31f492b10e4ff8da3bad1d231b4b8ddedfe50c24	CAR_31f492b10e4ff8da3bad1d231b4b8ddedfe50c24	86_5_CAR_93048ade533bb9963ee2c2cb0d5e568fcd838daa	CAR_93048ade533bb9963ee2c2cb0d5e568fcd838daa	86_5_CAR_42327cf47fa455267920b346a862e59c307d2da1	CAR_42327cf47fa455267920b346a862e59c307d2da1		What were important ski locations used in the 2002 olympic winter games?	CAR_1bbf5d444d33830a9fba3e166b2ac7783c902944	86_5_CAR_1bbf5d444d33830a9fba3e166b2ac7783c902944	The Utah Olympic Park is a winter sports park built for the 2002 Winter Olympics, and is located east of Salt Lake City near Park City, Utah, United States. During the 2002 games the park hosted the bobsleigh, skeleton, luge, ski jumping, and Nordic combined events. It still serves a training center for Olympic and development level athletes. Other facilities in addition to the ski jumps and bobs…	2		#N/A	#N/A	#N/A
What were important ski locations used in the 2002 olympic winter games?	86_5	Where did the ski sports take place in Utah ?	The men's Ski cross competition of the FIS Freestyle World Ski Championships 2011 was held at Deer Valley, Utah, United States between February 3 and 4, 2011 (qualifications and finals).	#N/A	0	What were the most important ski locations for the 2002 Winter Olympics in Utah ?	Soldier Hollow is a cross-country ski resort located southeast of Salt Lake City in Wasatch Mountain State Park, Utah, United States. The resort was created for the 2002 Winter Olympics, and during the games it hosted the biathlon, cross-country skiing and the cross country skiing portion of the Nordic combined events. Since hosting the Olympics, it has been developed as a cross-country skiing, t…	2		What were some of the famous ski resorts used for the 2002 Winter Olympics ?	Alpine skiing at the 2002 Winter Olympics consisted of ten events held near Salt Lake City, Utah, United States. The downhill, super-G and combined events were held at Snowbasin, the giant slalom at Park City, and the slalom at Deer Valley. The ten events took place 10–23 February 2002.	4		What were important ski locations used for the 2002 games in Utah ?	Alpine skiing at the 2002 Winter Olympics consisted of ten events held near Salt Lake City, Utah, United States. The downhill, super-G and combined events were held at Snowbasin, the giant slalom at Park City, and the slalom at Deer Valley. The ten events took place 10–23 February 2002.	4		46	TRUE	86_5_CAR_da1de2cf9cb89780fd6fad71136dcd31eafdad08	CAR_da1de2cf9cb89780fd6fad71136dcd31eafdad08	86_5_CAR_1bbf5d444d33830a9fba3e166b2ac7783c902944	CAR_1bbf5d444d33830a9fba3e166b2ac7783c902944	86_5_CAR_9d1c4bfe75b0ebbd5274778abcb344b9fea4618d	CAR_9d1c4bfe75b0ebbd5274778abcb344b9fea4618d		What were important ski locations used in the 2002 olympic winter games?	CAR_9d1c4bfe75b0ebbd5274778abcb344b9fea4618d	86_5_CAR_9d1c4bfe75b0ebbd5274778abcb344b9fea4618d	Nordic combined at the 2002 Winter Olympics, consisted of three events held over ten days, from 9 February to 22 February. The ski jumping part took place in Park City, while the cross-country part took place in Soldier Hollow. This was the first Winter Olympics to have two individual Nordic Combined events: the 10 km individual normal hill (sprint) and the 10 km individual large hill (individual…	4	3	#N/A	#N/A	#N/A
What are the important non-ski events that happen in Salt Lake City?	86_6	What events occurred in Salt Lake City other than skiing ?	Many of Salt Lake City's cultural events take place at Washington Square, and often 200 East Street between it and Library Square is blocked off to create one large event plaza. Events that take place in this space include Utah Pride Festival, the Utah Arts Festival, and Salt Lake City Jazz Festival and the Living Traditions Festival that celebrates all the different cultures that reside within t…	4		What are non - skiing events that happen in Salt Lake City ?	Many of Salt Lake City's cultural events take place at Washington Square, and often 200 East Street between it and Library Square is blocked off to create one large event plaza. Events that take place in this space include Utah Pride Festival, the Utah Arts Festival, and Salt Lake City Jazz Festival and the Living Traditions Festival that celebrates all the different cultures that reside within t…	4		What are some non - ski events held in Salt Lake City ?	Many of Salt Lake City's cultural events take place at Washington Square, and often 200 East Street between it and Library Square is blocked off to create one large event plaza. Events that take place in this space include Utah Pride Festival, the Utah Arts Festival, and Salt Lake City Jazz Festival and the Living Traditions Festival that celebrates all the different cultures that reside within t…	4		What are the important non - ski events that happen in Salt Lake City ?	Many of Salt Lake City's cultural events take place at Washington Square, and often 200 East Street between it and Library Square is blocked off to create one large event plaza. Events that take place in this space include Utah Pride Festival, the Utah Arts Festival, and Salt Lake City Jazz Festival and the Living Traditions Festival that celebrates all the different cultures that reside within t…	4		47	FALSE	86_6_CAR_61aceaf6d0bb903abfa76da6fa70c74df1ad0e0f	CAR_61aceaf6d0bb903abfa76da6fa70c74df1ad0e0f	86_6_CAR_61aceaf6d0bb903abfa76da6fa70c74df1ad0e0f	CAR_61aceaf6d0bb903abfa76da6fa70c74df1ad0e0f	86_6_CAR_61aceaf6d0bb903abfa76da6fa70c74df1ad0e0f	CAR_61aceaf6d0bb903abfa76da6fa70c74df1ad0e0f		What are the important non-ski events that happen in Salt Lake City?	CAR_61aceaf6d0bb903abfa76da6fa70c74df1ad0e0f	86_6_CAR_61aceaf6d0bb903abfa76da6fa70c74df1ad0e0f	Many of Salt Lake City's cultural events take place at Washington Square, and often 200 East Street between it and Library Square is blocked off to create one large event plaza. Events that take place in this space include Utah Pride Festival, the Utah Arts Festival, and Salt Lake City Jazz Festival and the Living Traditions Festival that celebrates all the different cultures that reside within t…	4		#N/A	#N/A	#N/A
What are the important non-ski events that happen in Salt Lake City?	86_6	What events occurred in Salt Lake City other than skiing ?	Salt Lake City has begun to host its own events in the last few years, most notably the Friday Night Flicks, free movies in the city's parks, as well as the Mayor's health and fitness awareness program, Salt Lake City Gets Fit.	3		What are non - skiing events that happen in Salt Lake City ?	Salt Lake City has begun to host its own events in the last few years, most notably the Friday Night Flicks, free movies in the city's parks, as well as the Mayor's health and fitness awareness program, Salt Lake City Gets Fit.	3		What are some non - ski events held in Salt Lake City ?	Salt Lake City has begun to host its own events in the last few years, most notably the Friday Night Flicks, free movies in the city's parks, as well as the Mayor's health and fitness awareness program, Salt Lake City Gets Fit.	3		What are the important non - ski events that happen in Salt Lake City ?	Salt Lake City has begun to host its own events in the last few years, most notably the Friday Night Flicks, free movies in the city's parks, as well as the Mayor's health and fitness awareness program, Salt Lake City Gets Fit.	3		47	FALSE	86_6_CAR_521afedd8202569bfd3e2eaf3b391e6a67b3077e	CAR_521afedd8202569bfd3e2eaf3b391e6a67b3077e	86_6_CAR_521afedd8202569bfd3e2eaf3b391e6a67b3077e	CAR_521afedd8202569bfd3e2eaf3b391e6a67b3077e	86_6_CAR_521afedd8202569bfd3e2eaf3b391e6a67b3077e	CAR_521afedd8202569bfd3e2eaf3b391e6a67b3077e		What are the important non-ski events that happen in Salt Lake City?	CAR_521afedd8202569bfd3e2eaf3b391e6a67b3077e	86_6_CAR_521afedd8202569bfd3e2eaf3b391e6a67b3077e	Salt Lake City has begun to host its own events in the last few years, most notably the Friday Night Flicks, free movies in the city's parks, as well as the Mayor's health and fitness awareness program, Salt Lake City Gets Fit.	3		#N/A	#N/A	#N/A
What are the important non-ski events that happen in Salt Lake City?	86_6	What events occurred in Salt Lake City other than skiing ?	The Assembly Hall was often the site of tension between Mormons, non-Mormons, and federal troops, but possibly the most dramatic event occurred in August 1874; Mayor Daniel H. Wells declared martial law from the balcony of City Hall. This was in response to US Marshal arrests of several Salt Lake City police officers in concert with taking over the polls for election of a Utah representative to c…	#N/A	0	What are non - skiing events that happen in Salt Lake City ?	Sandy, another suburb of Salt Lake City, holds a Hot Air Balloon Festival at the end of summer. The main event includes several waves of hot air balloons which rise into the sky for an afternoon and evening show. The festival includes food and entertainment.	2		What are some non - ski events held in Salt Lake City ?	Salt Lake City also hosts portions of the Sundance Film Festival. The festival, which is held each year, brings many cultural icons, movie stars, celebrities, and thousands of film buffs to see the largest independent film festival in the United States. The headquarters of the event is in nearby Park City.	2		What are the important non - ski events that happen in Salt Lake City ?	Salt Lake City also hosts portions of the Sundance Film Festival. The festival, which is held each year, brings many cultural icons, movie stars, celebrities, and thousands of film buffs to see the largest independent film festival in the United States. The headquarters of the event is in nearby Park City.	2		47	FALSE	86_6_CAR_330989c8df351086973ed7dfe2317bc823c44a38	CAR_330989c8df351086973ed7dfe2317bc823c44a38	86_6_CAR_2048981a1bf1ca35b91a3dc2cd3a61081f5f02c1	CAR_2048981a1bf1ca35b91a3dc2cd3a61081f5f02c1	86_6_CAR_b9687fe09c6536bcd05ae7df38ff3f67e90ac368	CAR_b9687fe09c6536bcd05ae7df38ff3f67e90ac368		What are the important non-ski events that happen in Salt Lake City?	CAR_b9687fe09c6536bcd05ae7df38ff3f67e90ac368	86_6_CAR_b9687fe09c6536bcd05ae7df38ff3f67e90ac368	Salt Lake City also hosts portions of the Sundance Film Festival. The festival, which is held each year, brings many cultural icons, movie stars, celebrities, and thousands of film buffs to see the largest independent film festival in the United States. The headquarters of the event is in nearby Park City.	2		#N/A	#N/A	#N/A
What are some popular non-winter things to do in the Salt Lake City area?	86_7	What are fun things to do and see in Salt Lake City if you do n't like the cold ?	From festivals to farmers' markets, there's always something to do in Salt Lake City. Whether you live or visit here, let us help you discover the dozens of great things to do year-round and help you find the services and resources to make life even better.	2		What are some fun summery things to do around Salt Lake City ?	Salt Lake City Map. Whether you want to go skiing in the Salt Lake City mountains or you prefer warm weather activities such as hiking and mountain biking, heading to one of the area resorts can be an excellent idea. These resorts are mostly found in the Wasatch Front Salt Lake City canyons, and they include Alta and Brighton, to name a couple.	2		What are the most well - known non - winter things to do in Salt Lake City ?	Salt Lake City Map. Whether you want to go skiing in the Salt Lake City mountains or you prefer warm weather activities such as hiking and mountain biking, heading to one of the area resorts can be an excellent idea. These resorts are mostly found in the Wasatch Front Salt Lake City canyons, and they include Alta and Brighton, to name a couple.	2		What are some popular non - winter things to do in the Salt Lake City area ?	Winter sports, such as skiing and snowboarding, are popular activities in the Wasatch Mountains east of Salt Lake City. Eight ski resorts lie within of the city. Alta, Brighton, Solitude, and Snowbird all lie directly to the southeast in the Wasatch Mountains, while nearby Park City contains three more resorts. The popularity of the ski resorts has increased nearly 29 percent since the 2002 Winte…	4		48	TRUE	86_7_MARCO_3516991	MARCO_3516991	86_7_MARCO_3967988	MARCO_3967988	86_7_MARCO_3967988	MARCO_3967988		What are some popular non-winter things to do in the Salt Lake City area?	CAR_c10e2ccd9e152afc277d3034b940619f2c9949c0	86_7_CAR_c10e2ccd9e152afc277d3034b940619f2c9949c0	Winter sports, such as skiing and snowboarding, are popular activities in the Wasatch Mountains east of Salt Lake City. Eight ski resorts lie within of the city. Alta, Brighton, Solitude, and Snowbird all lie directly to the southeast in the Wasatch Mountains, while nearby Park City contains three more resorts. The popularity of the ski resorts has increased nearly 29 percent since the 2002 Winte…	4		#N/A	#N/A	#N/A
What are some popular non-winter things to do in the Salt Lake City area?	86_7	What are fun things to do and see in Salt Lake City if you do n't like the cold ?	Salt Lake Temple and Tabernacle in Salt Lake City, Utah Like at other Latter-day Saints temples, you'll need to get baptized and meet with a bishop before you go inside. Once you do, 10 acres of one of Brigham Young's first churches are yours to explore.	#N/A	0	What are some fun summery things to do around Salt Lake City ?	From festivals to farmers' markets, there's always something to do in Salt Lake City. Whether you live or visit here, let us help you discover the dozens of great things to do year-round and help you find the services and resources to make life even better.	2		What are the most well - known non - winter things to do in Salt Lake City ?	From festivals to farmers' markets, there's always something to do in Salt Lake City. Whether you live or visit here, let us help you discover the dozens of great things to do year-round and help you find the services and resources to make life even better.	2		What are some popular non - winter things to do in the Salt Lake City area ?	Kayaking on the Great Salt Lake is a great way to see some of the areas that you normally wouldn't see. With 10,000 miles of shoreline it can be one of the most rewarding places to paddle in North America. Mountain biking is popular on excellent trails on Antelope and Stansbury islands.	1		48	TRUE	86_7_MARCO_7643722	MARCO_7643722	86_7_MARCO_3516991	MARCO_3516991	86_7_MARCO_3516991	MARCO_3516991		What are some popular non-winter things to do in the Salt Lake City area?	MARCO_16902	86_7_MARCO_16902	Kayaking on the Great Salt Lake is a great way to see some of the areas that you normally wouldn't see. With 10,000 miles of shoreline it can be one of the most rewarding places to paddle in North America. Mountain biking is popular on excellent trails on Antelope and Stansbury islands.	1		#N/A	#N/A	#N/A
What are some popular non-winter things to do in the Salt Lake City area?	86_7	What are fun things to do and see in Salt Lake City if you do n't like the cold ?	1 United Statesâº. 2 Utah (UT)âº. 3 Salt Lake Cityâº. 4 Things to Do in Salt Lake Cityâº. Utah Museum of Fine Arts.	#N/A	0	What are some fun summery things to do around Salt Lake City ?	The list of sights and things to do in Orem year-round make it an enticing getaway for residents of Salt Lake City, 39 miles north, and for visitors to central Utah. Juneâs annual Summerfest packs a Saturday and Sunday with music, food and fun.	1		What are the most well - known non - winter things to do in Salt Lake City ?	Leading attractions in Salt Lake City are focused on the cityâs founding by Mormon pioneers in the mid-19th century. Temple Square, located on 35 acres in downtown Salt Lake City, includes approximately 20 attractions, with Salt Lake Temple at its center.	#N/A	1	What are some popular non - winter things to do in the Salt Lake City area ?	From festivals to farmers' markets, there's always something to do in Salt Lake City. Whether you live or visit here, let us help you discover the dozens of great things to do year-round and help you find the services and resources to make life even better.	2		48	TRUE	86_7_MARCO_7542929	MARCO_7542929	86_7_MARCO_8451913	MARCO_8451913	86_7_MARCO_5347793	MARCO_5347793		What are some popular non-winter things to do in the Salt Lake City area?	MARCO_3516991	86_7_MARCO_3516991	Salt Lake City Map. Whether you want to go skiing in the Salt Lake City mountains or you prefer warm weather activities such as hiking and mountain biking, heading to one of the area resorts can be an excellent idea. These resorts are mostly found in the Wasatch Front Salt Lake City canyons, and they include Alta and Brighton, to name a couple.	2		#N/A	#N/A	#N/A
What are the different types of orange trees?	87_1	What are the different types of orange trees ? What makes them different ?	Sweet Orange Citrus sinenis Family: Rutaceae. Clementine, Mandarin, Tangerine, Satsuma Citrus reticulata, Family: Rutaceae. Description & storage Orange: Round thick skinned juicy edible fruit that is a reddish-yellow color when ripe. Mandarin types: type of small orange with loose skin. Store them at 12 degrees Celcius (=57o F) or if you like in the refrigerator. This is nice when you use them f…	2		How many varieties of orange trees are there ? How are orange trees unique ?	Bibile Sweet, is the most popular variety unique to the area. However, it is a matter of concern that black spots caused by a fungus affected the fruits on the verge of harvest. Thousands of rotten oranges are found under the trees. The trees should be exposed to the sun to prevent the spread of the pest. Trees in shady gardens are more susceptible to the pest. The affected trees should be pruned…	#N/A	0	What are the various kinds of orange trees ?	1 Common orange â There are many varieties of common orange and it is widely grown. 2 The most common varieties of common oranges are the Valencia, Hartâs Tardiff Valencia, and the Hamlin, but there are dozens of other types.	2		What are the different types of orange trees ?	Below, check out our guide to nine different types of oranges -- clementines, tangerines, honey tangerines, cara caras, tangelos, navels, juice oranges, blood oranges and Satsumas.	3		49	FALSE	87_1_MARCO_7161299	MARCO_7161299	87_1_CAR_f39e9f8833f9e412b223273951c5b1bd1a485b48	CAR_f39e9f8833f9e412b223273951c5b1bd1a485b48	87_1_MARCO_7016257	MARCO_7016257		What are the different types of orange trees?	MARCO_2866939	87_1_MARCO_2866939	Below, check out our guide to nine different types of oranges -- clementines, tangerines, honey tangerines, cara caras, tangelos, navels, juice oranges, blood oranges and Satsumas.	3		#N/A	0	#N/A
What are the different types of orange trees?	87_1	What are the different types of orange trees ? What makes them different ?	Below, check out our guide to nine different types of oranges -- clementines, tangerines, honey tangerines, cara caras, tangelos, navels, juice oranges, blood oranges and Satsumas. Next time you're at the store, try something new! What's your favorite kind of orange? Leave us a comment below.	3		How many varieties of orange trees are there ? How are orange trees unique ?	1 Common orange â There are many varieties of common orange and it is widely grown. 2 The most common varieties of common oranges are the Valencia, Hartâs Tardiff Valencia, and the Hamlin, but there are dozens of other types.	2		What are the various kinds of orange trees ?	Different names have been given to the many varieties of the genus. Orange applies primarily to the sweet orange – Citrus sinensis (L.) Osbeck. The orange tree is an evergreen, flowering tree, with an average height of , although some very old specimens can reach . Its oval leaves, alternately arranged, are long and have crenulate margins. Although the sweet orange presents different sizes and sh…	2		What are the different types of orange trees ?	The most common varieties of common oranges are the Valencia, Hartâs Tardiff Valencia, and the Hamlin, but there are dozens of other types. Blood or pigmented orange â The blood orange consists of two types: the light blood orange and the deep blood orange. Blood oranges are a natural mutation of C. sinensis.	3		49	FALSE	87_1_MARCO_8513155	MARCO_8513155	87_1_MARCO_7016257	MARCO_7016257	87_1_CAR_b02209357410c50f8025bff46b97b8a3fd68a07b	CAR_b02209357410c50f8025bff46b97b8a3fd68a07b		What are the different types of orange trees?	MARCO_8513150	87_1_MARCO_8513150	The most common varieties of common oranges are the Valencia, Hartâs Tardiff Valencia, and the Hamlin, but there are dozens of other types. Blood or pigmented orange â The blood orange consists of two types: the light blood orange and the deep blood orange. Blood oranges are a natural mutation of C. sinensis.	3		#N/A	#N/A	#N/A
What are the different types of orange trees?	87_1	What are the different types of orange trees ? What makes them different ?	From Europe, orange trees were taken to the United States, South America, Africa and Australia, which all grow oranges for sale. There are several different types of sweet orange. One of the most common types is called the Valencia orange, which comes from Spain and is also grown in Africa and Australia.	1		How many varieties of orange trees are there ? How are orange trees unique ?	Blood Oranges. A Blood Orange is a unique hybrid orange citrus fruit, with a dark-red interior colored fruit. What is unique about a blood orange is the color inside â it is a red, crimson, blood-colored flesh.Blood oranges also tend to be a much smaller citrus fruit than an average orange.nique Oranges â Ortaniques. Unique Oranges are also called âOrtaniques,â representing a hybrid blend…	#N/A	2	What are the various kinds of orange trees ?	Other citrus groups also known as oranges are: 1 Bitter orange (Citrus aurantium), also known as Seville orange, sour orange (especially when used as rootstock for a sweet orange tree), bigarade orange and marmalade orange. Like the sweet orange, it is a pomelo x mandarin hybrid.	3		What are the different types of orange trees ?	1 The most common varieties of common oranges are the Valencia, Hartâs Tardiff Valencia, and the Hamlin, but there are dozens of other types. 2 Blood or pigmented orange â The blood orange consists of two types: the light blood orange and the deep blood orange.	2		49	FALSE	87_1_MARCO_7016261	MARCO_7016261	87_1_MARCO_6315743	MARCO_6315743	87_1_MARCO_4984109	MARCO_4984109		What are the different types of orange trees?	MARCO_7016258	87_1_MARCO_7016258	1 The most common varieties of common oranges are the Valencia, Hartâs Tardiff Valencia, and the Hamlin, but there are dozens of other types. 2 Blood or pigmented orange â The blood orange consists of two types: the light blood orange and the deep blood orange.	2		#N/A	2	#N/A
How can you tell different types of orange trees apart?	87_2	How do you tell the different orange trees apart ?	Best Answer: It's really hard to tell what kind is your Orange tree is at this point. For the spikes, it's usually normal for oranges to have those no matter what kind they maybe.Especially that you pruned it so drastically short like that. Young trees or branches sport those spikes. Upon looking at the pictures I have a good feeling that it might be the bigger variety of oranges.est Answer: It's…	1		How do you determine the different varieties of orange trees ?	Commercially grown orange trees are propagated asexually by grafting a mature cultivar onto a suitable seedling rootstock to ensure the same yield, identical fruit characteristics, and resistance to diseases throughout the years. Propagation involves two stages: first, a rootstock is grown from seed. Then, when it is approximately one year old, the leafy top is cut off and a bud taken from a spec…	#N/A	0	How do you tell which kinds of orange trees are distinct ?	Best Answer: It's really hard to tell what kind is your Orange tree is at this point. For the spikes, it's usually normal for oranges to have those no matter what kind they maybe.Especially that you pruned it so drastically short like that. Young trees or branches sport those spikes. Upon looking at the pictures I have a good feeling that it might be the bigger variety of oranges.est Answer: It's…	1		How can you tell the different types of orange trees apart ?	Best Answer: It's really hard to tell what kind is your Orange tree is at this point. For the spikes, it's usually normal for oranges to have those no matter what kind they maybe.Especially that you pruned it so drastically short like that. Young trees or branches sport those spikes. Upon looking at the pictures I have a good feeling that it might be the bigger variety of oranges.est Answer: It's…	1		50	TRUE	87_2_MARCO_6314847	MARCO_6314847	87_2_CAR_bd051e55bc2e824d3aed6f5d86d36907c969fc87	CAR_bd051e55bc2e824d3aed6f5d86d36907c969fc87	87_2_MARCO_6314847	MARCO_6314847		How can you tell different types of orange trees apart?	MARCO_6314847	87_2_MARCO_6314847	Best Answer: It's really hard to tell what kind is your Orange tree is at this point. For the spikes, it's usually normal for oranges to have those no matter what kind they maybe.Especially that you pruned it so drastically short like that. Young trees or branches sport those spikes. Upon looking at the pictures I have a good feeling that it might be the bigger variety of oranges.est Answer: It's…	1		#N/A	#N/A	#N/A
How can you tell different types of orange trees apart?	87_2	How do you tell the different orange trees apart ?	Sweet Orange Citrus sinenis Family: Rutaceae. Clementine, Mandarin, Tangerine, Satsuma Citrus reticulata, Family: Rutaceae. Description & storage Orange: Round thick skinned juicy edible fruit that is a reddish-yellow color when ripe. Mandarin types: type of small orange with loose skin. Store them at 12 degrees Celcius (=57o F) or if you like in the refrigerator. This is nice when you use them f…	0		How do you determine the different varieties of orange trees ?	Different names have been given to the many varieties of the genus. Orange applies primarily to the sweet orange – Citrus sinensis (L.) Osbeck. The orange tree is an evergreen, flowering tree, with an average height of , although some very old specimens can reach . Its oval leaves, alternately arranged, are long and have crenulate margins. Although the sweet orange presents different sizes and sh…	0		How do you tell which kinds of orange trees are distinct ?	Different names have been given to the many varieties of the genus. Orange applies primarily to the sweet orange – Citrus sinensis (L.) Osbeck. The orange tree is an evergreen, flowering tree, with an average height of , although some very old specimens can reach . Its oval leaves, alternately arranged, are long and have crenulate margins. Although the sweet orange presents different sizes and sh…	0		How can you tell the different types of orange trees apart ?	Examining the tree's leaves, fruit and blossoms will help identify it. Citrus treesâ characteristic dark, shiny leaves make them easy to identify from other types of fruiting and nonfruiting trees, but it can be difficult to tell the difference between various types of citrus trees. There are several varieties of citrus trees, such as a Perrine tree, that are a hybrid of a lemon and a lime plan…	0		50	TRUE	87_2_MARCO_7161299	MARCO_7161299	87_2_CAR_b02209357410c50f8025bff46b97b8a3fd68a07b	CAR_b02209357410c50f8025bff46b97b8a3fd68a07b	87_2_CAR_b02209357410c50f8025bff46b97b8a3fd68a07b	CAR_b02209357410c50f8025bff46b97b8a3fd68a07b		How can you tell different types of orange trees apart?	MARCO_1378432	87_2_MARCO_1378432	Examining the tree's leaves, fruit and blossoms will help identify it. Citrus treesâ characteristic dark, shiny leaves make them easy to identify from other types of fruiting and nonfruiting trees, but it can be difficult to tell the difference between various types of citrus trees. There are several varieties of citrus trees, such as a Perrine tree, that are a hybrid of a lemon and a lime plan…	0		#N/A	#N/A	#N/A
How can you tell different types of orange trees apart?	87_2	How do you tell the different orange trees apart ?	Orange trees generally are grafted. The bottom of the tree, including the roots and trunk, is called rootstock, while the fruit-bearing top has two different names: budwood (when referring to the process of grafting) and scion (when mentioning the variety of orange).	0		How do you determine the different varieties of orange trees ?	Semi-dwarf varieties are 10 to 15 feet tall at their mature height, while dwarf orange trees are 5 to 10 feet tall. Orange trees can bear fruit well before they reach their full height. Age and growing conditions, not whether a tree has reached its full height, determine whether and how quickly a tree will bear fruit.	2		How do you tell which kinds of orange trees are distinct ?	(Redirected from Orange tree). For other fruit called orange, see List of plants known as orange. Citrus Ã sinensis, also known as the Citrus aurantium Sweet Orange Group, includes the commonly cultivated sweet orange, blood oranges, and navel oranges.ses [edit]. The orange fruit is an important agricultural product, used for both the juicy fruit pulp, and the aromatic peel (rind). Orange blosso…	0		How can you tell the different types of orange trees apart ?	Different names have been given to the many varieties of the genus. Orange applies primarily to the sweet orange – Citrus sinensis (L.) Osbeck. The orange tree is an evergreen, flowering tree, with an average height of , although some very old specimens can reach . Its oval leaves, alternately arranged, are long and have crenulate margins. Although the sweet orange presents different sizes and sh…	0		50	TRUE	87_2_CAR_cb795bc6653c7b9dbc7079f78491aada921b68d9	CAR_cb795bc6653c7b9dbc7079f78491aada921b68d9	87_2_MARCO_5694950	MARCO_5694950	87_2_MARCO_7799628	MARCO_7799628		How can you tell different types of orange trees apart?	CAR_b02209357410c50f8025bff46b97b8a3fd68a07b	87_2_CAR_b02209357410c50f8025bff46b97b8a3fd68a07b	Different names have been given to the many varieties of the genus. Orange applies primarily to the sweet orange – Citrus sinensis (L.) Osbeck. The orange tree is an evergreen, flowering tree, with an average height of , although some very old specimens can reach . Its oval leaves, alternately arranged, are long and have crenulate margins. Although the sweet orange presents different sizes and sh…	0		#N/A	#N/A	#N/A
What type of orange tree has thorns?	87_3	Which variety of orange tree has thorns and why ?	Sweet orange trees can definitely have thorns. I have a pineapple orange tree, (in the ground 10 years) that has some wicked thorns, especially on new growth. I've got a cara-cara red navel that also has thorns on new growth. I like what you've done to your yard and how you've taken care of this tree, (2nd picture).	4		What varieties of orange trees grow thorns ?	Sweet orange trees can definitely have thorns. I have a pineapple orange tree, (in the ground 10 years) that has some wicked thorns, especially on new growth. I've got a cara-cara red navel that also has thorns on new growth. I like what you've done to your yard and how you've taken care of this tree, (2nd picture).	4		What types of orange trees come with thorns ?	Sweet orange trees can definitely have thorns. I have a pineapple orange tree, (in the ground 10 years) that has some wicked thorns, especially on new growth. I've got a cara-cara red navel that also has thorns on new growth. I like what you've done to your yard and how you've taken care of this tree, (2nd picture).	4		What type of orange tree has thorns ?	Sweet orange trees can definitely have thorns. I have a pineapple orange tree, (in the ground 10 years) that has some wicked thorns, especially on new growth. I've got a cara-cara red navel that also has thorns on new growth. I like what you've done to your yard and how you've taken care of this tree, (2nd picture).	4		51	FALSE	87_3_MARCO_5272302	MARCO_5272302	87_3_MARCO_5272302	MARCO_5272302	87_3_MARCO_5272302	MARCO_5272302		What type of orange tree has thorns?	MARCO_5272302	87_3_MARCO_5272302	Sweet orange trees can definitely have thorns. I have a pineapple orange tree, (in the ground 10 years) that has some wicked thorns, especially on new growth. I've got a cara-cara red navel that also has thorns on new growth. I like what you've done to your yard and how you've taken care of this tree, (2nd picture).	4		#N/A	#N/A	#N/A
What type of orange tree has thorns?	87_3	Which variety of orange tree has thorns and why ?	Besides the distinctive fruit and orange-yellow wood, Osage orange trees are known for their long, tire-flattening thorns. The male trees produce the pollen, and the female trees produce the fruit. Botanists are working on development of a male, thornless variety, for more friendly, modern landscaping. Even though you can't eat them, Osage oranges have many uses.	4		What varieties of orange trees grow thorns ?	Pittosporum lancifolium, known as the Narrow-leaved Orange Thorn or Sticky Orange Thorn, is a shrub or tree growing in eastern Australia. Often found at altitudes above 500 metres above sea level; from Mallanganee National Park in New South Wales in the south to Yarraman in south east Queensland in the north.	0		What types of orange trees come with thorns ?	Pittosporum lancifolium, known as the Narrow-leaved Orange Thorn or Sticky Orange Thorn, is a shrub or tree growing in eastern Australia. Often found at altitudes above 500 metres above sea level; from Mallanganee National Park in New South Wales in the south to Yarraman in south east Queensland in the north.	0		What type of orange tree has thorns ?	Pittosporum lancifolium, known as the Narrow-leaved Orange Thorn or Sticky Orange Thorn, is a shrub or tree growing in eastern Australia. Often found at altitudes above 500 metres above sea level; from Mallanganee National Park in New South Wales in the south to Yarraman in south east Queensland in the north.	0		51	FALSE	87_3_MARCO_7099398	MARCO_7099398	87_3_CAR_6840a7bc4c3c5bc654045c8b8e2ffce3ec26f389	CAR_6840a7bc4c3c5bc654045c8b8e2ffce3ec26f389	87_3_CAR_6840a7bc4c3c5bc654045c8b8e2ffce3ec26f389	CAR_6840a7bc4c3c5bc654045c8b8e2ffce3ec26f389		What type of orange tree has thorns?	CAR_6840a7bc4c3c5bc654045c8b8e2ffce3ec26f389	87_3_CAR_6840a7bc4c3c5bc654045c8b8e2ffce3ec26f389	Pittosporum lancifolium, known as the Narrow-leaved Orange Thorn or Sticky Orange Thorn, is a shrub or tree growing in eastern Australia. Often found at altitudes above 500 metres above sea level; from Mallanganee National Park in New South Wales in the south to Yarraman in south east Queensland in the north.	0		#N/A	#N/A	#N/A
What type of orange tree has thorns?	87_3	Which variety of orange tree has thorns and why ?	Today, most varieties are either thornless or have thin, blunt, flexible thorns found only at the base of the leaves. Oranges that are bitter and not commonly consumed, however, may have large thorns. The hardy or trifoliate orange tree, for example, features sharp, 2-inch long thorns and sour fruit.he thorns are the tree's way of protecting itself against hungry animals that want to nibble on th…	4		What varieties of orange trees grow thorns ?	Today, most varieties are either thornless or have thin, blunt, flexible thorns found only at the base of the leaves. Oranges that are bitter and not commonly consumed, however, may have large thorns. The hardy or trifoliate orange tree, for example, features sharp, 2-inch long thorns and sour fruit.he thorns are the tree's way of protecting itself against hungry animals that want to nibble on th…	4		What types of orange trees come with thorns ?	Today, most varieties are either thornless or have thin, blunt, flexible thorns found only at the base of the leaves. Oranges that are bitter and not commonly consumed, however, may have large thorns. The hardy or trifoliate orange tree, for example, features sharp, 2-inch long thorns and sour fruit.he thorns are the tree's way of protecting itself against hungry animals that want to nibble on th…	4		What type of orange tree has thorns ?	Pittosporum multiflorum, known as the orange thorn, is a shrub growing in eastern Australia. The dense foliage provides a habitat for small birds and animals. It grows on shales or volcanic soils, from Eden, New South Wales north to Queensland. Usually in or near rainforest areas.	0		51	FALSE	87_3_MARCO_6314853	MARCO_6314853	87_3_MARCO_6314853	MARCO_6314853	87_3_MARCO_6314853	MARCO_6314853		What type of orange tree has thorns?	CAR_10b90a297d1850e5ceb34c050a60f86da5062f43	87_3_CAR_10b90a297d1850e5ceb34c050a60f86da5062f43	Pittosporum multiflorum, known as the orange thorn, is a shrub growing in eastern Australia. The dense foliage provides a habitat for small birds and animals. It grows on shales or volcanic soils, from Eden, New South Wales north to Queensland. Usually in or near rainforest areas.	0		#N/A	#N/A	#N/A
Where do orange trees originally come from?	87_4	Where have orange trees evolved from ?	History of Oranges. January 2017 - The first wild ancestors of oranges and lemons probably evolved in Australia and New Guinea, where the first people probably began eating them soon after they arrived there, about 30,000 BC. As early as the Stone Age, people were eating citron fruits in China, too.	2		What region did orange trees originate from ?	The most recent research indicates an origin in Australia, New Caledonia and New Guinea. Some researchers believe that the origin is in the part of Southeast Asia bordered by Northeast India, Burma (Myanmar) and the Yunnan province of China, and it is in this region that some commercial species such as oranges, mandarins, and lemons originated. Citrus fruit has been cultivated in an ever-widening…	#N/A	2	What is the history of orange trees ?	According to a 1917 study by Palemon Dorsett, Archibald Dixon Shamel and Wilson Popenoe of the United States Department of Agriculture (USDA), a single mutation in a Selecta orange tree planted on the grounds of a monastery near Bahia, Brazil, probably yielded the first navel orange between 1810 and 1820. Nevertheless, a researcher at the University of California, Riverside, has suggested that th…	3		Where do orange trees originally come from ?	In 1873 Eliza Tibbets received two new grafted orange trees to grow and test, from the botanist William Saunders, the Director of the new U.S. Department of Agriculture in Washington, D.C.. He had ordered the original cuttings from Bahia, Brazil.	3		52	TRUE	87_4_MARCO_28181	MARCO_28181	87_4_CAR_e96fb987ad39d55838b6b94aa2922c3c1906f32c	CAR_e96fb987ad39d55838b6b94aa2922c3c1906f32c	87_4_CAR_17818109b7a798085b34d528c7ab7b62cd95f945	CAR_17818109b7a798085b34d528c7ab7b62cd95f945		Where do orange trees originally come from?	CAR_c929f039ae5071891773bddc9e3a2ac56d0624e1	87_4_CAR_c929f039ae5071891773bddc9e3a2ac56d0624e1	The fruit came first. The English word orange has made quite a journey to get here. The fruit originally came from China â the German word Apfelsine and the Dutch sinaasappel (Chinese apple) reflect this â but our word ultimately comes from the Old Persian narang.	3		#N/A	#N/A	#N/A
Where do orange trees originally come from?	87_4	Where have orange trees evolved from ?	Seville orange trees transplanted on Curaçao from Spain in 1527 did not thrive in the arid climate and soil of this Southern Caribbean island. As the trees were then abandoned, the fruit evolved from a bright orange color and sweet taste into the green and inedible bitter laraha. The dried peels of the laraha, however, were discovered to be pleasantly aromatic, and experimentation with the extrac…	2		What region did orange trees originate from ?	The orange is the fruit made from Spain, through Valencia, and spreading throughout the rest of the world. In Greek mythology the The Garden of the Hesperides is a mythological grove where apples grew tended to by nymphs and a dragon. Hercules, the hero of classical literature, killed the guardian, entered the garden and plucked those golden apples –In later years it was thought that the "golden …	3		What is the history of orange trees ?	Ribera Alta has a long orange farming tradition. The economy and population boomed in the area in the 18th century, and Ribera Alta profited from an expansion that also affected a sector as important as agriculture. Orange farming was introduced in this context. According to the historical records, in 1781 priest Vicente Monzó, notary Maseres and pharmacist Bodí, planted the first fields of orang…	#N/A	2	Where do orange trees originally come from ?	The fruit came first. The English word orange has made quite a journey to get here. The fruit originally came from China â the German word Apfelsine and the Dutch sinaasappel (Chinese apple) reflect this â but our word ultimately comes from the Old Persian narang.	1		52	TRUE	87_4_CAR_db777b1b580b9c124f8607c5c5644ad5ecdc4db2	CAR_db777b1b580b9c124f8607c5c5644ad5ecdc4db2	87_4_CAR_76e66882fa789b8e1b88153c9321ea308d94912c	CAR_76e66882fa789b8e1b88153c9321ea308d94912c	87_4_CAR_a4adff3b9f4d4afea464ed75680b6187b1529aa3	CAR_a4adff3b9f4d4afea464ed75680b6187b1529aa3		Where do orange trees originally come from?	MARCO_7410040	87_4_MARCO_7410040	In 1873 Eliza Tibbets received two new grafted orange trees to grow and test, from the botanist William Saunders, the Director of the new U.S. Department of Agriculture in Washington, D.C.. He had ordered the original cuttings from Bahia, Brazil.	1		#N/A	#N/A	#N/A
Where do orange trees originally come from?	87_4	Where have orange trees evolved from ?	The large citrus fruit of today evolved originally from small, edible berries over millions of years. Citrus plants diverged from a common ancestor about 15 million years ago, which was about when it diverged from the closely related severinia, for example the Chinese box orange. About 7 million years ago, citrus plants diverged into two groups, the main citrus genus and the ancestors of the Trif…	#N/A	4	What region did orange trees originate from ?	The orange is the fruit of the citrus sinensis or aurantium, a tree that first appeared in China and other southern areas of the Asian continent. The fruit made its way from the Far East to the European continent, reaching Spain, through Valencia, and spreading throughout the rest of the world. In Greek mythology the The Garden of the Hesperides is a mythological grove where apples grew tended to…	3		What is the history of orange trees ?	Word Origin & History. orange c.1300, from O.Fr. orenge (12c.), from M.L. pomum de orenge, from It. arancia, originally narancia (Venetian naranza), alt. of Arabic naranj, from Pers. narang, from Skt. naranga-s orange tree, of uncertain origin.	0		Where do orange trees originally come from ?	The first orange trees were planted in 1871, but the citrus industry Riverside is famous for beginning three years later (1874) when Eliza Tibbetts received three Brazilian navel orange trees sent to her by a personal friend, William Saunders who was a horticulturist at the United States Department of Agriculture in Washington, D.C. The trees came from Bahia, Brazil. The Bahia orange did not do w…	3		52	TRUE	87_4_CAR_ca323fe3edfe898ac1ee6d60a932d7ac40591b6c	CAR_ca323fe3edfe898ac1ee6d60a932d7ac40591b6c	87_4_CAR_e329b876005e0edde984c7e8c8303f8573749a56	CAR_e329b876005e0edde984c7e8c8303f8573749a56	87_4_MARCO_657766	MARCO_657766		Where do orange trees originally come from?	CAR_d1598d76471296a28069f367a73907c476b5020e	87_4_CAR_d1598d76471296a28069f367a73907c476b5020e	The first orange trees were planted in 1871, but the citrus industry Riverside is famous for beginning three years later (1874) when Eliza Tibbetts received three Brazilian navel orange trees sent to her by a personal friend, William Saunders who was a horticulturist at the United States Department of Agriculture in Washington, D.C. The trees came from Bahia, Brazil. The Bahia orange did not do w…	3		4	#N/A	#N/A							4
Tell me about the Hamlin orange variety.	87_5	What is the Hamlin ?	Hamlin is a village in Salem Township, Wayne County, Pennsylvania. Hamlin is located at the intersection of Pennsylvania Route 191/Pennsylvania Route 196 and Pennsylvania Route 590.	#N/A	0	What are some facts about the Hamlin variety of orange trees ?	Trees from groves in hammocks or areas covered with pine forest are budded on sour orange trees, a method that gives a high solids content. On sand, they are grafted on rough lemon rootstock. The Hamlin orange is one of the most popular juice oranges in Florida and replaces the Parson Brown variety as the principal early-season juice orange. This cultivar is now the leading early orange in Florid…	4		What are some features of the Hamlin variety of orange trees ?	Trees from groves in hammocks or areas covered with pine forest are budded on sour orange trees, a method that gives a high solids content. On sand, they are grafted on rough lemon rootstock. The Hamlin orange is one of the most popular juice oranges in Florida and replaces the Parson Brown variety as the principal early-season juice orange. This cultivar is now the leading early orange in Florid…	4		Tell me about the Hamlin variety of orange trees .	Trees from groves in hammocks or areas covered with pine forest are budded on sour orange trees, a method that gives a high solids content. On sand, they are grafted on rough lemon rootstock. The Hamlin orange is one of the most popular juice oranges in Florida and replaces the Parson Brown variety as the principal early-season juice orange. This cultivar is now the leading early orange in Florid…	4		53	FALSE	87_5_CAR_b5ecce543361ce4532da34e0ab4bf8a1139d2b8c	CAR_b5ecce543361ce4532da34e0ab4bf8a1139d2b8c	87_5_CAR_324a662bc5882c7008be352a502ab559cd54bada	CAR_324a662bc5882c7008be352a502ab559cd54bada	87_5_CAR_324a662bc5882c7008be352a502ab559cd54bada	CAR_324a662bc5882c7008be352a502ab559cd54bada		Tell me about the Hamlin orange variety.	CAR_324a662bc5882c7008be352a502ab559cd54bada	87_5_CAR_324a662bc5882c7008be352a502ab559cd54bada	Trees from groves in hammocks or areas covered with pine forest are budded on sour orange trees, a method that gives a high solids content. On sand, they are grafted on rough lemon rootstock. The Hamlin orange is one of the most popular juice oranges in Florida and replaces the Parson Brown variety as the principal early-season juice orange. This cultivar is now the leading early orange in Florid…	4		#N/A	#N/A	#N/A
Tell me about the Hamlin orange variety.	87_5	What is the Hamlin ?	Hamlin, originally named "Hamline," is a town in Lincoln County, West Virginia, United States, along the Mud River. The population was recorded as 1,142 at the 2010 census. It is the county seat of Lincoln County. Hamlin is a part of the Huntington-Ashland, WV-KY-OH, Metropolitan Statistical Area (MSA). As of the 2010 census, the MSA had a population of 287,702. New definitions from February 28, …	#N/A	0	What are some facts about the Hamlin variety of orange trees ?	Citrus Products. Florida growers produce several types of Florida citrus, including oranges, grapefruit and speciality fruit including Temple oranges, tangerines and tangelos. Here are some fun facts about Florida oranges: The primary varieties are Navel, Hamlin, Pineapple, Ambersweet and Valencia.	1		What are some features of the Hamlin variety of orange trees ?	Ambersweet Orange. Tastes like a mild tangerine; easy to peel and section. Excellent source of Vitamin C and fiber, containing more fiber than an English muffin. Hamlin Orange. Medium size, round to oval, deep yellow to orange color with a smooth, thin peel.	3		Tell me about the Hamlin variety of orange trees .	1 Common orange â There are many varieties of common orange and it is widely grown. 2 The most common varieties of common oranges are the Valencia, Hartâs Tardiff Valencia, and the Hamlin, but there are dozens of other types.	1		53	FALSE	87_5_CAR_48c48f5d47732bbb1c026fe5d70b80f41762adf3	CAR_48c48f5d47732bbb1c026fe5d70b80f41762adf3	87_5_MARCO_5154347	MARCO_5154347	87_5_MARCO_8215197	MARCO_8215197		Tell me about the Hamlin orange variety.	MARCO_7016257	87_5_MARCO_7016257	Ambersweet Orange. Tastes like a mild tangerine; easy to peel and section. Excellent source of Vitamin C and fiber, containing more fiber than an English muffin. Hamlin Orange. Medium size, round to oval, deep yellow to orange color with a smooth, thin peel.	1		#N/A	#N/A	#N/A
Tell me about the Hamlin orange variety.	87_5	What is the Hamlin ?	Hamlin is an unincorporated community in Audubon County, Iowa, United States.	0		What are some facts about the Hamlin variety of orange trees ?	Facts About Orange blossom. 1 The sweet orange tree, which bears the orange blossom, is a compact evergreen tree, 20-30 tall with a rounded, symmetrical crown spreading 15-20 or so. 2 The Orange twigs on many cultivars are thorny. The bark of the orange tree is greenish-brown color, having axillary spines on the branches.	#N/A	0	What are some features of the Hamlin variety of orange trees ?	1 Common orange â There are many varieties of common orange and it is widely grown. 2 The most common varieties of common oranges are the Valencia, Hartâs Tardiff Valencia, and the Hamlin, but there are dozens of other types.	1		Tell me about the Hamlin variety of orange trees .	Ambersweet Orange. Tastes like a mild tangerine; easy to peel and section. Excellent source of Vitamin C and fiber, containing more fiber than an English muffin. Hamlin Orange. Medium size, round to oval, deep yellow to orange color with a smooth, thin peel.	3		53	FALSE	87_5_CAR_a63466d559a6ab2c1d8e2427e92ac31fed5d3bb9	CAR_a63466d559a6ab2c1d8e2427e92ac31fed5d3bb9	87_5_MARCO_4060467	MARCO_4060467	87_5_MARCO_7016257	MARCO_7016257		Tell me about the Hamlin orange variety.	MARCO_8215197	87_5_MARCO_8215197	1 Common orange â There are many varieties of common orange and it is widely grown. 2 The most common varieties of common oranges are the Valencia, Hartâs Tardiff Valencia, and the Hamlin, but there are dozens of other types.	3		#N/A	0	#N/A
Why did the Hamlin orange replace the Parson Brown variety?	87_6	Why did the Hamlin take the place of PB ?	Although Hamlin climbed out of the car right after the crash, he immediately collapsed and lay on the track. He was airlifted to the hospital as a precaution. When lying in the hospital Hamlin interpreted Logano's post race words about their battle as Logano saying that he held a grudge against Hamlin and retaliated against Hamlin. It was announced the next day that Hamlin had suffered a massive …	#N/A		Why did the Hamlin variety substitute the PB ?	Trees from groves in hammocks or areas covered with pine forest are budded on sour orange trees, a method that gives a high solids content. On sand, they are grafted on rough lemon rootstock. The Hamlin orange is one of the most popular juice oranges in Florida and replaces the Parson Brown variety as the principal early-season juice orange. This cultivar is now the leading early orange in Florid…	#N/A		Why is the Hamlin variety superior to the PB ?	Trees from groves in hammocks or areas covered with pine forest are budded on sour orange trees, a method that gives a high solids content. On sand, they are grafted on rough lemon rootstock. The Hamlin orange is one of the most popular juice oranges in Florida and replaces the Parson Brown variety as the principal early-season juice orange. This cultivar is now the leading early orange in Florid…	#N/A		Why did the Hamlin variety replace PB ?	Trees from groves in hammocks or areas covered with pine forest are budded on sour orange trees, a method that gives a high solids content. On sand, they are grafted on rough lemon rootstock. The Hamlin orange is one of the most popular juice oranges in Florida and replaces the Parson Brown variety as the principal early-season juice orange. This cultivar is now the leading early orange in Florid…	#N/A		54	TRUE	87_6_CAR_5fc306f32b00ddba23cac1605a5a681931c8dc47	CAR_5fc306f32b00ddba23cac1605a5a681931c8dc47	87_6_CAR_324a662bc5882c7008be352a502ab559cd54bada	CAR_324a662bc5882c7008be352a502ab559cd54bada	87_6_CAR_324a662bc5882c7008be352a502ab559cd54bada	CAR_324a662bc5882c7008be352a502ab559cd54bada		Why did the Hamlin orange replace the Parson Brown variety?	CAR_324a662bc5882c7008be352a502ab559cd54bada	87_6_CAR_324a662bc5882c7008be352a502ab559cd54bada	Trees from groves in hammocks or areas covered with pine forest are budded on sour orange trees, a method that gives a high solids content. On sand, they are grafted on rough lemon rootstock. The Hamlin orange is one of the most popular juice oranges in Florida and replaces the Parson Brown variety as the principal early-season juice orange. This cultivar is now the leading early orange in Florid…	#N/A	1	#N/A	#N/A	#N/A
Why did the Hamlin orange replace the Parson Brown variety?	87_6	Why did the Hamlin take the place of PB ?	By lap 60, Johnson built up a 1.5 second lead over Kurt Busch, while Hamlin moved into the third position. Green flag pit stops took place from lap 65 to 73; Kurt Busch reclaimed the lead at the end of the cycle. On lap 90, Johnson passed Kurt Busch to take over the lead position. One lap later, Hamlin took over fifth position. On the 102nd lap, Martin and Gordon moved into third and fourth respe…	#N/A		Why did the Hamlin variety substitute the PB ?	At Charlotte, for the Coca-Cola 600, Hamlin clinched a pole position with a record speed of , breaking the previous speed of set by Greg Biffle. During the race, Hamlin led six laps and finished in the fourth position.	#N/A		Why is the Hamlin variety superior to the PB ?	When looking into which variety has more protein, 40 percent of conversation around natural peanut butter mentions protein, compared to 18 percent of conversation around regular peanut butter. Natural PB comes out on top with the topic of overall health as well.	#N/A		Why did the Hamlin variety replace PB ?	The MG TA Midget replaced the PB in 1936. It was an evolution of the previous car and was wider in its track at and longer in its wheelbase at .	#N/A		54	TRUE	87_6_CAR_df2947389263c16a1d08ca4d7cec63bc46657127	CAR_df2947389263c16a1d08ca4d7cec63bc46657127	87_6_CAR_69060ba6f777410b8ddc4f694143d25df2780cbb	CAR_69060ba6f777410b8ddc4f694143d25df2780cbb	87_6_MARCO_6813064	MARCO_6813064		Why did the Hamlin orange replace the Parson Brown variety?	CAR_cd9ba53684a41370f21db95bdc6ef921e2aad827	87_6_CAR_cd9ba53684a41370f21db95bdc6ef921e2aad827	In 1931, she and her husband Ausker Hughes, a chemist, moved to Lake County, Florida, where they both worked on citrus research. By 1935, they had 75 acres of test groves under production. Together they developed a number of new orange strains that are precursors of widely planted present-day varieties, working especially with nucellar seedlings of Parson Brown and Valencia oranges.	#N/A	0	#N/A	#N/A	#N/A
Why did the Hamlin orange replace the Parson Brown variety?	87_6	Why did the Hamlin take the place of PB ?	At the 2015 Food City 500, Erik Jones replaced Hamlin after the latter suffered neck spasms. Jones took the car to a 26th-place finish, but Hamlin started the race and was credited with the finish.	#N/A		Why did the Hamlin variety substitute the PB ?	Hamlin did a variety of engravings (technically etchings), most of which were done on order such as membership certificates, bank notes, bookplates, watch papers, portraits and Providence buildings. Portraits of George Washington is his most enduring legacy. He did four engravings of Washington for the 1800 publication "Memory of Washington" by Oliver Farnsworth. They became the object of public …	#N/A		Why is the Hamlin variety superior to the PB ?	By the turn of the 20th century, the Golden Age of the Piano was in full force and the most illustrious concert artists of the day aligned themselves with piano manufacturers including Sergei Rachmaninoff whose 1924 recording of his Second Piano Concerto was made using a Mason & Hamlin. Composer Maurice Ravel said of Mason & Hamlin pianos, "While preserving all the qualities of the percussion ins…	#N/A		Why did the Hamlin variety replace PB ?	At the spring Bristol race, Hamlin was replaced by Erik Jones after 22 laps due to suffering from neck spasms.	#N/A		54	TRUE	87_6_CAR_ad8ef5ee9505af29ccfc1d3d56b1398f86e91e9a	CAR_ad8ef5ee9505af29ccfc1d3d56b1398f86e91e9a	87_6_CAR_1fadf14ba7a84e4efee4628b3e7d78faf0beab49	CAR_1fadf14ba7a84e4efee4628b3e7d78faf0beab49	87_6_CAR_377acf3b8a8d50a83698db56296986729cef7648	CAR_377acf3b8a8d50a83698db56296986729cef7648		Why did the Hamlin orange replace the Parson Brown variety?	CAR_27407d5b1cf3da6f4ab5793c07be4e922a63445e	87_6_CAR_27407d5b1cf3da6f4ab5793c07be4e922a63445e	In the 2014 Auto Club 400, Sam Hornish, Jr. replaced Hamlin due to Hamlin having what was thought to be sinus infection, but later revealed to be a piece of metal in his eye that impaired his vision. Hornish, who was actually on standby for teammate Matt Kenseth, finished a solid 17th in his return to Cup.	#N/A	0	#N/A	#N/A	#N/A
What are the different types of navel oranges?	87_7	How many different sorts of navels are there ?	Below, check out our guide to nine different types of oranges -- clementines, tangerines, honey tangerines, cara caras, tangelos, navels, juice oranges, blood oranges and Satsumas.	1		Are all navels the same ? What types are there of orange trees ?	1 Of the navels, the most common types are the Cara cara, Bahia, Dream navel, Late Navel and Washington or California Navel. 2 Acid-less orange â Acid-less oranges have very little acid, hence little flavor. 3 Acid-less oranges are early season fruit and are also called âsweetâ oranges.	3		What are the kinds of navels available from orange trees ?	1 Of the navels, the most common types are the Cara cara, Bahia, Dream navel, Late Navel and Washington or California Navel. 2 Acid-less orange â Acid-less oranges have very little acid, hence little flavor. 3 Acid-less oranges are early season fruit and are also called âsweetâ oranges.	3		What are the different types of navels ?	1 Of the navels, the most common types are the Cara cara, Bahia, Dream navel, Late Navel and Washington or California Navel. 2 Acid-less orange â Acid-less oranges have very little acid, hence little flavor. 3 Acid-less oranges are early season fruit and are also called âsweetâ oranges.	3		55	FALSE	87_7_MARCO_2866939	MARCO_2866939	87_7_MARCO_7016262	MARCO_7016262	87_7_MARCO_7016262	MARCO_7016262		What are the different types of navel oranges?	MARCO_7016262	87_7_MARCO_7016262	1 Of the navels, the most common types are the Cara cara, Bahia, Dream navel, Late Navel and Washington or California Navel. 2 Acid-less orange â Acid-less oranges have very little acid, hence little flavor. 3 Acid-less oranges are early season fruit and are also called âsweetâ oranges.	3		#N/A	#N/A	#N/A
What are the different types of navel oranges?	87_7	How many different sorts of navels are there ?	Below, check out our guide to nine different types of oranges -- clementines, tangerines, honey tangerines, cara caras, tangelos, navels, juice oranges, blood oranges and Satsumas. Next time you're at the store, try something new! What's your favorite kind of orange? Leave us a comment below.	0		Are all navels the same ? What types are there of orange trees ?	Today, navel oranges continue to be propagated through cutting and grafting. This does not allow for the usual selective breeding methodologies, and so all navel oranges can be considered fruits from that single, nearly two-hundred-year-old tree: they have exactly the same genetic make-up as the original tree and are, therefore, clones. This case is similar to that of the common yellow seedless b…	#N/A	0	What are the kinds of navels available from orange trees ?	WASHINGTON NAVEL ORANGE (Citrus sinensis âWashington Navelâ). The Washington Navel is the most popular backyard orange grown in Australia. It is a small to medium sized tree that produces oranges ripening in mid winter.Oranges are medium to large, (depending on the quantity of fruit set), and very sweet and juicy.ANES LATE NAVEL ORANGE (Citrus sinensis âLanes Late Navelâ). Almost identica…	2		What are the different types of navels ?	The researchers at North Carolina State University discovered that while it was difficult to predict every strain of bacteria in the microbiome of the navel that they could predict which strains would be prevalent and which strains of bacteria would be quite rare in the microbiome. It was found that the navel microbiomes only contained a few prevalent types of bacteria (Staphylococcus, Corynebact…	0		55	FALSE	87_7_MARCO_8513155	MARCO_8513155	87_7_CAR_888cd19336a8d1663bf6df6f8dfbe1d6932b075e	CAR_888cd19336a8d1663bf6df6f8dfbe1d6932b075e	87_7_MARCO_4879350	MARCO_4879350		What are the different types of navel oranges?	CAR_ab15995208a85dd9dd502284aef5f1da43a0b61b	87_7_CAR_ab15995208a85dd9dd502284aef5f1da43a0b61b	Oranges: There are different types of oranges: navel oranges, Valencia oranges and blood oranges are the most cultivated races. Tangelos: a tangelo is a crossing between a tangerine, a grapefruit and an orange.	0		#N/A	0	#N/A
What are the different types of navel oranges?	87_7	How many different sorts of navels are there ?	The researchers at North Carolina State University discovered that while it was difficult to predict every strain of bacteria in the microbiome of the navel that they could predict which strains would be prevalent and which strains of bacteria would be quite rare in the microbiome. It was found that the navel microbiomes only contained a few prevalent types of bacteria (Staphylococcus, Corynebact…	0		Are all navels the same ? What types are there of orange trees ?	Oranges: There are different types of oranges: navel oranges, Valencia oranges and blood oranges are the most cultivated races. Tangelos: a tangelo is a crossing between a tangerine, a grapefruit and an orange.	0		What are the kinds of navels available from orange trees ?	1 In the blood orange category, varieties of orange fruit include: Maltese, Moro, Sanguinelli, Scarlet Navel and Tarocco. 2 Navel orange â The navel orange is of great commercial import and we know it well as the most common orange sold at the grocers.	0		What are the different types of navels ?	Staphylococcus and Corynebacterium were among the most common types of bacteria found in the navels of this project’s volunteers and these types of bacteria have been found to be the most common types of bacteria found on the human skin in larger studies of the skin microbiome (of which the Belly Button Biodiversity Project is a part). (In these larger studies it has been found that females gener…	0		55	FALSE	87_7_CAR_ab15995208a85dd9dd502284aef5f1da43a0b61b	CAR_ab15995208a85dd9dd502284aef5f1da43a0b61b	87_7_MARCO_7016263	MARCO_7016263	87_7_MARCO_7016264	MARCO_7016264		What are the different types of navel oranges?	CAR_30fb6070c3a5b8860a18f975bee53df4190fee8c	87_7_CAR_30fb6070c3a5b8860a18f975bee53df4190fee8c	Featured Item: Cara Cara Navel Oranges: Cara cara navel oranges, are a variety of navel oranges. They were first discovered in 1976 at Hacienda Cara Cara in Venezuela and later introduced in Florida and then in California during the 1980s.	0		#N/A	#N/A	#N/A
Which type of navel orange is the most delicious?	87_8	What kind of navel is the best ?	Navel California navel oranges are considered by many to be the best oranges in the world for eating out of hand. They have a meaty flesh, their thick rinds are easy to peel, the segments separate easily, and they have no seeds.	3		What 's the best orange tree ?	The best pick for homegrown citrus is a dwarf variety, a plant that is grafted onto special rootstock that prevents the tree from growing too large. Many citrus trees can be grown as dwarves, including Meyer lemon, kaffir lime, and 'Trovita' and calamondin oranges, which are amenable to indoor cultivation.	#N/A	0	What kinds of navels are best for eating ?	The navel orange actually grows a second âtwinâ fruit opposite its stem. The second fruit remains underdeveloped, but from the outside, it looks like a human navelâhence the name. Navels are part of the winter citrus family. Theyâre seedless, peel easily, and are thought to be one of the worldâs best-tasting oranges.	0		Which of the different types of navels is the most delicious ?	The progeny trees derived from this parent source tree continues to be the most popular navel grown in California. In the estimation of many, the fruit of the Washington navel remains the finest in size, flavor, quality, lack of seed, low rag and excellent holding capacity when the fruit is held on the tree. The navel orange remains as one of the most popular of all of the varieties of fresh frui…	3		56	TRUE	87_8_MARCO_2448406	MARCO_2448406	87_8_MARCO_5754847	MARCO_5754847	87_8_MARCO_2866936	MARCO_2866936		Which type of navel orange is the most delicious?	CAR_01e19910d85aefe38d9823c2a2fe2afe230782cd	87_8_CAR_01e19910d85aefe38d9823c2a2fe2afe230782cd	The progeny trees derived from this parent source tree continues to be the most popular navel grown in California. In the estimation of many, the fruit of the Washington navel remains the finest in size, flavor, quality, lack of seed, low rag and excellent holding capacity when the fruit is held on the tree. The navel orange remains as one of the most popular of all of the varieties of fresh frui…	3		#N/A	#N/A	#N/A
Which type of navel orange is the most delicious?	87_8	What kind of navel is the best ?	The progeny trees derived from this parent source tree continues to be the most popular navel grown in California. In the estimation of many, the fruit of the Washington navel remains the finest in size, flavor, quality, lack of seed, low rag and excellent holding capacity when the fruit is held on the tree. The navel orange remains as one of the most popular of all of the varieties of fresh frui…	3		What 's the best orange tree ?	Orange trees (Citrus sinensis), known also as sweet orange or round orange, are one of the most fragrant plants and flowers. The orange tree displays round fruit and sweet, fragrant, white orange blossoms that measure approximately 2 inches in width. The evergreen leaves are a source of fragrance.	0		What kinds of navels are best for eating ?	Cool areas can still have fresh oranges if you grow a small tree in a container and keep it protected over winter. There are many kinds of oranges to choose from, each with their own unique flavor. Navel oranges are good for fresh eating, and Valencia are usually grown for their sweet juice.	#N/A	0	Which of the different types of navels is the most delicious ?	1 Of the navels, the most common types are the Cara cara, Bahia, Dream navel, Late Navel and Washington or California Navel. 2 Acid-less orange â Acid-less oranges have very little acid, hence little flavor. 3 Acid-less oranges are early season fruit and are also called âsweetâ oranges.	1		56	TRUE	87_8_CAR_01e19910d85aefe38d9823c2a2fe2afe230782cd	CAR_01e19910d85aefe38d9823c2a2fe2afe230782cd	87_8_MARCO_3305252	MARCO_3305252	87_8_MARCO_6122606	MARCO_6122606		Which type of navel orange is the most delicious?	MARCO_7016262	87_8_MARCO_7016262	Navel California navel oranges are considered by many to be the best oranges in the world for eating out of hand. They have a meaty flesh, their thick rinds are easy to peel, the segments separate easily, and they have no seeds.	1		#N/A	#N/A	#N/A
Which type of navel orange is the most delicious?	87_8	What kind of navel is the best ?	The two most familiar varieties are navel and Valencia oranges, which are very good, but if you limit yourself to them, you're missing out on some real treats. Navel California navel oranges are considered by many to be the best oranges in the world for eating out of hand.	3		What 's the best orange tree ?	The best pick for homegrown citrus is a dwarf variety, a plant that is grafted onto special rootstock that prevents the tree from growing too large. Many citrus trees can be grown as dwarves, including Meyer lemon, kaffir lime, and 'Trovita' and calamondin oranges, which are amenable to indoor cultivation. Soon enough, you could be harvesting oranges for marmalade, preparing desserts with Meyer l…	#N/A	0	What kinds of navels are best for eating ?	Winter and summer oranges. Navel oranges (the winter orange) and Valencia oranges (the summer orange) are similar in flavor and appearance, but what distinguishes one from the other?	#N/A	0	Which of the different types of navels is the most delicious ?	The two most familiar varieties are navel and Valencia oranges, which are very good, but if you limit yourself to them, you're missing out on some real treats. Navel California navel oranges are considered by many to be the best oranges in the world for eating out of hand.	3		56	TRUE	87_8_MARCO_2866937	MARCO_2866937	87_8_MARCO_6545384	MARCO_6545384	87_8_MARCO_2866935	MARCO_2866935		Which type of navel orange is the most delicious?	MARCO_2866937	87_8_MARCO_2866937	The two most familiar varieties are navel and Valencia oranges, which are very good, but if you limit yourself to them, you're missing out on some real treats. Navel California navel oranges are considered by many to be the best oranges in the world for eating out of hand.	3		#N/A	#N/A	#N/A
How do cara cara oranges compare with blood oranges?	87_9	What are some similarities and differences between navels and blood oranges ?	Blood oranges possess a distinctive flavor compared to other sweet oranges like navels. This citrus variety is considered less acidic in taste than the navel and often contains overtones of berries such as raspberry or strawberry. The blood orange is considered an eating and juicing orange, while the navel is more of an eating orange.	1		What is the difference between navels and blood oranges ?	Blood oranges possess a distinctive flavor compared to other sweet oranges like navels. This citrus variety is considered less acidic in taste than the navel and often contains overtones of berries such as raspberry or strawberry. The blood orange is considered an eating and juicing orange, while the navel is more of an eating orange.	1		How do navel oranges contrast with blood oranges ?	Blood oranges possess a distinctive flavor compared to other sweet oranges like navels. This citrus variety is considered less acidic in taste than the navel and often contains overtones of berries such as raspberry or strawberry. The blood orange is considered an eating and juicing orange, while the navel is more of an eating orange.	1		How do navels compare with blood oranges ?	Blood oranges possess a distinctive flavor compared to other sweet oranges like navels. This citrus variety is considered less acidic in taste than the navel and often contains overtones of berries such as raspberry or strawberry. The blood orange is considered an eating and juicing orange, while the navel is more of an eating orange.	1		57	FALSE	87_9_MARCO_6897852	MARCO_6897852	87_9_MARCO_6897852	MARCO_6897852	87_9_MARCO_6897852	MARCO_6897852		How do cara cara oranges compare with blood oranges?	MARCO_6897852	87_9_MARCO_6897852	While also pigmented, Cara cara navels and Vainiglia Sanguignos have pigmentation based on lycopene, not anthocyanins like blood oranges. Moro. The 'Moro' is the most colorful of the blood oranges, with a deep red flesh and a rind with a bright red blush. The flavor is stronger and the aroma is more intense than a normal orange.	1		#N/A	#N/A	#N/A
How do cara cara oranges compare with blood oranges?	87_9	What are some similarities and differences between navels and blood oranges ?	The blood orange does not possess this feature, and the skin in general is thinner than that of the thick-skinned navel. The fruit flesh of the blood orange is usually pink or red in color, hence its name. The juice of the blood orange is also red, unlike the orange-colored juice of the navel fruit.	1		What is the difference between navels and blood oranges ?	The blood orange does not possess this feature, and the skin in general is thinner than that of the thick-skinned navel. The fruit flesh of the blood orange is usually pink or red in color, hence its name. The juice of the blood orange is also red, unlike the orange-colored juice of the navel fruit.	1		How do navel oranges contrast with blood oranges ?	The blood orange does not possess this feature, and the skin in general is thinner than that of the thick-skinned navel. The fruit flesh of the blood orange is usually pink or red in color, hence its name. The juice of the blood orange is also red, unlike the orange-colored juice of the navel fruit.	1		How do navels compare with blood oranges ?	The blood orange does not possess this feature, and the skin in general is thinner than that of the thick-skinned navel. The fruit flesh of the blood orange is usually pink or red in color, hence its name. The juice of the blood orange is also red, unlike the orange-colored juice of the navel fruit.	1		57	FALSE	87_9_MARCO_6897846	MARCO_6897846	87_9_MARCO_6897846	MARCO_6897846	87_9_MARCO_6897846	MARCO_6897846		How do cara cara oranges compare with blood oranges?	MARCO_6897846	87_9_MARCO_6897846	Blood oranges possess a distinctive flavor compared to other sweet oranges like navels. This citrus variety is considered less acidic in taste than the navel and often contains overtones of berries such as raspberry or strawberry. The blood orange is considered an eating and juicing orange, while the navel is more of an eating orange.	1		#N/A	#N/A	#N/A
How do cara cara oranges compare with blood oranges?	87_9	What are some similarities and differences between navels and blood oranges ?	Blood and navel oranges are both citrus fruits. They can be used similarly in desserts, as a snack or as an ingredient in a salad or recipe. However, these two types of oranges are significantly different in appearance, taste and nutritional values.	1		What is the difference between navels and blood oranges ?	While also pigmented, Cara cara navels and Vainiglia Sanguignos have pigmentation based on lycopene, not anthocyanins like blood oranges. Moro. The 'Moro' is the most colorful of the blood oranges, with a deep red flesh and a rind with a bright red blush. The flavor is stronger and the aroma is more intense than a normal orange.	2		How do navel oranges contrast with blood oranges ?	Blood oranges, also known as raspberry oranges and Sanguinelli oranges, are somewhat less sweet than a navel orange and have a more complex flavor than a Valencia. I like to mix Valencia juice with blood orange juice. ...However, I hate to be the bearer of bad tidings: the bulk of the Blood oranges produced in the US are grown in California, and this is the time of the year when the crop is ripen…	0		How do navels compare with blood oranges ?	Blood oranges, also known as raspberry oranges and Sanguinelli oranges, are somewhat less sweet than a navel orange and have a more complex flavor than a Valencia. I like to mix Valencia juice with blood orange juice. ...However, I hate to be the bearer of bad tidings: the bulk of the Blood oranges produced in the US are grown in California, and this is the time of the year when the crop is ripen…	0		57	FALSE	87_9_MARCO_6897850	MARCO_6897850	87_9_MARCO_7415576	MARCO_7415576	87_9_MARCO_4542055	MARCO_4542055		How do cara cara oranges compare with blood oranges?	MARCO_4542055	87_9_MARCO_4542055	Blood oranges tend to be a bit smaller than other types of oranges, with a thick, pitted skin that may or may not have a reddish blush, but generally look like regular oranges from the outside -- but then you cut them open and the difference is striking indeed.	0		#N/A	#N/A	#N/A
[truncated: 477 more rows]

## Sheet: MAN_TEST_Passage_Analysis
MANUAL TESTS														Paraphrased
R1,R2 and R3 are random Paraphrase Test sets.		Overall Results										[R1+R2+R3]									[ORG]				[QREL]
ORG is the original CAsT Turn Baseline.		Manual							Statistics:				SCORED Passages:				NEW #N/A Passages:				ORG Passages:				Full QREL file:
#N/A are passages not included in original QREL file.			Before new QREL addition	R1	R2	R3	ORG		# of Topics		25		Total Passages:	1872			QREL Additon:				Original QREL:
New #N/A passages are scored according to CAsT guidelines.			NDCG@3	0.4897	0.4669	0.4581	0.6002		# of Turns:		216		#N/A [no score]	328	0.175214	new!	Total [Duplicate]	328			Total	624			Original QREL:
			Recall@1000	0.6199	0.6309	0.6226	0.7304		# of Assesed Turns		208		Total Scored:	1544	0.824786		Total [unique]	278	0.847561		#N/A [no score]	12	0.0192308		Total	40451
			Map	0.3108	0.3014	0.2988	0.4083						0 -not relevant	425	0.275259		0 -not relevant	184	0.661871		0 -not relevant	153	0.245192	4	0 -not relevant	33781	0.835109
[truncated: 665 more rows]

## Sheet: Human Evaluation
	Semantic Similarity																Expression Diversity																Raw Semantic Similarity																Conversational Entailment
[truncated: 2,560 more rows]
[truncated: 27 more columns]
